# Supplementary material
Source: publisher figshare collection journal article supplement (https://springernature.figshare.com/ndownloader/files/22062960)
Supplement: Supplementary file 1 [file 22062960]

SUBJECT_ID	SESSION_ID	CLASS_LABEL	CLASS_LABEL_DETAILED	SEX	AGE	HEIGHT	BODY_WEIGHT	BODY_MASS	SHOE_SIZE	AFFECTED_SIDE	SHOD_CONDITION	ORTHOPEDIC_INSOLE	SPEED	READMISSION	SESSION_TYPE	SESSION_DATE	TRAIN	TRAIN_BALANCED	TEST
1	29885	HC	HC	1	18	173	516.1	52.6	42	NaN	1	0	2	0	1	29.01.2015	0	0	1
1	29886	HC	HC	1	18	173	516.2	52.6	42	NaN	1	0	1	0	1	29.01.2015	0	0	1
1	29888	HC	HC	1	18	173	516.1	52.6	42	NaN	1	0	3	0	1	29.01.2015	0	0	1
2	888812549	HC	HC	1	51	182	752.1	76.7	44	NaN	1	0	1	0	1	03.08.2017	1	0	0
2	888812550	HC	HC	1	51	182	752.4	76.7	44	NaN	1	0	3	0	1	03.08.2017	1	0	0
2	888812548	HC	HC	1	51	182	751.9	76.6	44	NaN	1	0	2	0	1	03.08.2017	1	1	0
3	19709	HC	HC	1	26	183	689.2	70.3	42	NaN	0	0	2	0	1	03.05.2012	1	0	0
3	19710	HC	HC	1	26	183	689.2	70.3	42	NaN	0	0	3	0	1	03.05.2012	1	0	0
3	19711	HC	HC	1	26	183	689.2	70.3	42	NaN	0	0	1	0	1	03.05.2012	1	0	0
3	19712	HC	HC	1	26	183	693.1	70.7	42	NaN	1	0	2	0	1	03.05.2012	1	1	0
3	19713	HC	HC	1	26	183	693.1	70.7	42	NaN	1	0	3	0	1	03.05.2012	1	0	0
3	19714	HC	HC	1	26	183	693.1	70.7	42	NaN	1	0	1	0	1	03.05.2012	1	0	0
4	19569	HC	HC	0	28	175	547.7	55.8	39	NaN	0	0	2	0	1	25.04.2012	1	0	0
4	19570	HC	HC	0	28	175	547.7	55.8	39	NaN	0	0	3	0	1	25.04.2012	1	0	0
4	19571	HC	HC	0	28	175	547.7	55.8	39	NaN	0	0	1	0	1	25.04.2012	1	0	0
4	19572	HC	HC	0	28	175	553.2	56.4	39	NaN	1	0	2	0	1	25.04.2012	1	1	0
4	19573	HC	HC	0	28	175	553.2	56.4	39	NaN	1	0	3	0	1	25.04.2012	1	0	0
4	19574	HC	HC	0	28	175	553.2	56.4	39	NaN	1	0	1	0	1	25.04.2012	1	0	0
5	19861	HC	HC	0	40	170	613.6	62.5	38	NaN	1	0	2	0	1	10.05.2012	1	1	0
5	19862	HC	HC	0	40	170	613.6	62.5	38	NaN	1	0	3	0	1	10.05.2012	1	0	0
5	19863	HC	HC	0	40	170	613.6	62.5	38	NaN	1	0	1	0	1	10.05.2012	1	0	0
5	19864	HC	HC	0	40	170	607.6	61.9	38	NaN	0	0	2	0	1	10.05.2012	1	0	0
5	19865	HC	HC	0	40	170	607.6	61.9	38	NaN	0	0	3	0	1	10.05.2012	1	0	0
5	19866	HC	HC	0	40	170	607.6	61.9	38	NaN	0	0	1	0	1	10.05.2012	1	0	0
6	19407	HC	HC	0	51	171	786.4	80.2	39	NaN	1	0	2	0	1	19.04.2012	0	0	1
6	19409	HC	HC	0	51	171	786.4	80.2	39	NaN	1	0	3	0	1	19.04.2012	0	0	1
6	19410	HC	HC	0	51	171	786.4	80.2	39	NaN	1	0	1	0	1	19.04.2012	0	0	1
6	19411	HC	HC	0	51	171	781.5	79.7	39	NaN	0	0	2	0	1	19.04.2012	0	0	1
6	19412	HC	HC	0	51	171	781.5	79.7	39	NaN	0	0	3	0	1	19.04.2012	0	0	1
6	19413	HC	HC	0	51	171	781.5	79.7	39	NaN	0	0	1	0	1	19.04.2012	0	0	1
7	29846	HC	HC	1	19	175	938.5	95.7	43	NaN	1	0	2	0	1	28.01.2015	0	0	1
7	29847	HC	HC	1	19	175	939.1	95.7	43	NaN	1	0	1	0	1	28.01.2015	0	0	1
7	29848	HC	HC	1	19	175	938.1	95.6	43	NaN	1	0	3	0	1	28.01.2015	0	0	1
8	29874	HC	HC	1	17	192	758.2	77.3	45	NaN	1	0	2	0	1	29.01.2015	1	1	0
8	29876	HC	HC	1	17	192	759.8	77.5	45	NaN	1	0	1	0	1	29.01.2015	1	0	0
8	29877	HC	HC	1	17	192	760.1	77.5	45	NaN	1	0	3	0	1	29.01.2015	1	0	0
9	20261	HC	HC	0	19	164	640.1	65.2	40	NaN	1	0	2	0	1	13.06.2012	1	1	0
9	20262	HC	HC	0	19	164	640.1	65.2	40	NaN	1	0	3	0	1	13.06.2012	1	0	0
9	20263	HC	HC	0	19	164	640.1	65.2	40	NaN	1	0	1	0	1	13.06.2012	1	0	0
9	20264	HC	HC	0	19	164	633	64.5	40	NaN	0	0	2	0	1	13.06.2012	1	0	0
9	20265	HC	HC	0	19	164	633	64.5	40	NaN	0	0	3	0	1	13.06.2012	1	0	0
9	20266	HC	HC	0	19	164	633	64.5	40	NaN	0	0	1	0	1	13.06.2012	1	0	0
10	19590	HC	HC	1	27	179	747.4	76.2	44	NaN	1	0	2	0	1	25.04.2012	0	0	1
10	19591	HC	HC	1	27	179	747.4	76.2	44	NaN	1	0	3	0	1	25.04.2012	0	0	1
10	19592	HC	HC	1	27	179	747.4	76.2	44	NaN	1	0	1	0	1	25.04.2012	0	0	1
10	19593	HC	HC	1	27	179	739.7	75.4	44	NaN	0	0	2	0	1	25.04.2012	0	0	1
10	19594	HC	HC	1	27	179	739.7	75.4	44	NaN	0	0	3	0	1	25.04.2012	0	0	1
10	19595	HC	HC	1	27	179	739.7	75.4	44	NaN	0	0	1	0	1	25.04.2012	0	0	1
11	29825	HC	HC	1	20	180	658.1	67.1	43	NaN	1	0	2	0	1	28.01.2015	0	0	1
11	29826	HC	HC	1	20	180	660.2	67.3	43	NaN	1	0	1	0	1	28.01.2015	0	0	1
11	29827	HC	HC	1	20	180	660.4	67.3	43	NaN	1	0	3	0	1	28.01.2015	0	0	1
12	30882	HC	HC	0	62	155	794.7	81	37	NaN	1	0	2	0	1	14.04.2015	1	1	0
12	30883	HC	HC	0	62	155	794.5	81	37	NaN	1	0	3	0	1	14.04.2015	1	0	0
12	30884	HC	HC	0	62	155	793.3	80.9	37	NaN	1	0	1	0	1	14.04.2015	1	0	0
13	19610	HC	HC	0	37	160	1018	103.8	38	NaN	1	0	2	0	1	26.04.2012	0	0	1
13	19611	HC	HC	0	37	160	1018	103.8	38	NaN	1	0	3	0	1	26.04.2012	0	0	1
13	19612	HC	HC	0	37	160	1018	103.8	38	NaN	1	0	1	0	1	26.04.2012	0	0	1
13	19613	HC	HC	0	37	160	1012	103.2	38	NaN	0	0	2	0	1	26.04.2012	0	0	1
13	19614	HC	HC	0	37	160	1012	103.2	38	NaN	0	0	3	0	1	26.04.2012	0	0	1
13	19615	HC	HC	0	37	160	1012	103.2	38	NaN	0	0	1	0	1	26.04.2012	0	0	1
14	19694	HC	HC	1	54	173	1263.6	128.8	43	NaN	1	0	2	0	1	03.05.2012	1	1	0
14	19695	HC	HC	1	54	173	1263.6	128.8	43	NaN	1	0	3	0	1	03.05.2012	1	0	0
14	19696	HC	HC	1	54	173	1263.6	128.8	43	NaN	1	0	1	0	1	03.05.2012	1	0	0
14	19697	HC	HC	1	54	173	1255.5	128	43	NaN	0	0	2	0	1	03.05.2012	1	0	0
14	19698	HC	HC	1	54	173	1255.5	128	43	NaN	0	0	3	0	1	03.05.2012	1	0	0
14	19699	HC	HC	1	54	173	1255.5	128	43	NaN	0	0	1	0	1	03.05.2012	1	0	0
15	30472	HC	HC	0	44	160	535	54.5	38	NaN	1	0	2	0	1	12.03.2015	1	1	0
15	30474	HC	HC	0	44	160	535	54.5	38	NaN	1	0	1	0	1	12.03.2015	1	0	0
15	30475	HC	HC	0	44	160	535	54.5	38	NaN	1	0	3	0	1	12.03.2015	1	0	0
16	30197	HC	HC	0	52	166	990	100.9	41	NaN	1	0	2	0	1	24.02.2015	0	0	1
16	30198	HC	HC	0	52	166	989.2	100.8	41	NaN	1	0	3	0	1	24.02.2015	0	0	1
16	30199	HC	HC	0	52	166	990.2	100.9	41	NaN	1	0	1	0	1	24.02.2015	0	0	1
17	19749	HC	HC	0	50	169	617.1	62.9	40	NaN	1	0	2	0	1	07.05.2012	1	1	0
17	19750	HC	HC	0	50	169	617.1	62.9	40	NaN	1	0	3	0	1	07.05.2012	1	0	0
17	19751	HC	HC	0	50	169	617.1	62.9	40	NaN	1	0	1	0	1	07.05.2012	1	0	0
18	30036	HC	HC	1	18	187	791	80.6	44	NaN	1	0	2	0	1	10.02.2015	1	1	0
18	30037	HC	HC	1	18	187	791.1	80.6	44	NaN	1	0	3	0	1	10.02.2015	1	0	0
18	30038	HC	HC	1	18	187	791.2	80.7	44	NaN	1	0	1	0	1	10.02.2015	1	0	0
19	30354	HC	HC	1	51	168	977.7	99.7	43	NaN	1	0	2	0	1	04.03.2015	0	0	1
19	30355	HC	HC	1	51	168	978	99.7	43	NaN	1	0	1	0	1	04.03.2015	0	0	1
19	30356	HC	HC	1	51	168	978	99.7	43	NaN	1	0	3	0	1	04.03.2015	0	0	1
20	29843	HC	HC	1	18	175	664.3	67.7	42	NaN	1	0	2	0	1	28.01.2015	1	1	0
20	29844	HC	HC	1	18	175	664.4	67.7	42	NaN	1	0	1	0	1	28.01.2015	1	0	0
20	29845	HC	HC	1	18	175	665.1	67.8	42	NaN	1	0	3	0	1	28.01.2015	1	0	0
21	29805	HC	HC	1	41	174	995.5	101.5	43	NaN	1	0	2	0	1	27.01.2015	1	1	0
21	29806	HC	HC	1	41	174	995.5	101.5	43	NaN	1	0	1	0	1	27.01.2015	1	0	0
21	29807	HC	HC	1	41	174	995.5	101.5	43	NaN	1	0	3	0	1	27.01.2015	1	0	0
22	30018	HC	HC	1	18	184	761.6	77.6	46	NaN	1	0	2	0	1	10.02.2015	0	0	1
22	30019	HC	HC	1	18	184	761.1	77.6	46	NaN	1	0	3	0	1	10.02.2015	0	0	1
22	30020	HC	HC	1	18	184	763.7	77.8	46	NaN	1	0	1	0	1	10.02.2015	0	0	1
23	19625	HC	HC	0	28	171	811.7	82.7	41	NaN	1	0	2	0	1	26.04.2012	1	1	0
23	19626	HC	HC	0	28	171	811.7	82.7	41	NaN	1	0	3	0	1	26.04.2012	1	0	0
23	19627	HC	HC	0	28	171	811.7	82.7	41	NaN	1	0	1	0	1	26.04.2012	1	0	0
23	19628	HC	HC	0	28	171	803.2	81.9	41	NaN	0	0	2	0	1	26.04.2012	1	0	0
23	19629	HC	HC	0	28	171	803.2	81.9	41	NaN	0	0	3	0	1	26.04.2012	1	0	0
23	19630	HC	HC	0	28	171	803.2	81.9	41	NaN	0	0	1	0	1	26.04.2012	1	0	0
24	39726	HC	HC	0	44	173	667.9	68.1	40	NaN	1	0	1	0	1	28.07.2017	1	0	0
24	39727	HC	HC	0	44	173	667.9	68.1	40	NaN	1	0	3	0	1	28.07.2017	1	0	0
24	39725	HC	HC	0	44	173	667.9	68.1	40	NaN	1	0	2	0	1	28.07.2017	1	1	0
25	30399	HC	HC	1	19	184	778.1	79.3	45	NaN	1	0	2	0	1	06.03.2015	1	1	0
25	30402	HC	HC	1	19	184	778	79.3	45	NaN	1	0	1	0	1	06.03.2015	1	0	0
25	30403	HC	HC	1	19	184	778	79.3	45	NaN	1	0	3	0	1	06.03.2015	1	0	0
26	19487	HC	HC	0	37	163	633.2	64.5	37	NaN	1	0	2	0	1	23.04.2012	0	0	1
26	19488	HC	HC	0	37	163	633.2	64.5	37	NaN	1	0	3	0	1	23.04.2012	0	0	1
26	19489	HC	HC	0	37	163	633.2	64.5	37	NaN	1	0	1	0	1	23.04.2012	0	0	1
26	19490	HC	HC	0	37	163	626.3	63.8	37	NaN	0	0	2	0	1	23.04.2012	0	0	1
26	19491	HC	HC	0	37	163	626.3	63.8	37	NaN	0	0	3	0	1	23.04.2012	0	0	1
26	19492	HC	HC	0	37	163	626.3	63.8	37	NaN	0	0	1	0	1	23.04.2012	0	0	1
27	19584	HC	HC	0	25	167	611.4	62.3	38	NaN	0	0	2	0	1	25.04.2012	1	0	0
27	19585	HC	HC	0	25	167	611.4	62.3	38	NaN	0	0	3	0	1	25.04.2012	1	0	0
27	19586	HC	HC	0	25	167	611.4	62.3	38	NaN	0	0	1	0	1	25.04.2012	1	0	0
27	19587	HC	HC	0	25	167	615.4	62.7	38	NaN	1	0	2	0	1	25.04.2012	1	1	0
27	19588	HC	HC	0	25	167	615.4	62.7	38	NaN	1	0	3	0	1	25.04.2012	1	0	0
27	19589	HC	HC	0	25	167	615.4	62.7	38	NaN	1	0	1	0	1	25.04.2012	1	0	0
28	19414	HC	HC	0	29	165	609	62.1	37	NaN	1	0	2	0	1	19.04.2012	1	1	0
28	19415	HC	HC	0	29	165	609	62.1	37	NaN	1	0	3	0	1	19.04.2012	1	0	0
28	19416	HC	HC	0	29	165	609	62.1	37	NaN	1	0	1	0	1	19.04.2012	1	0	0
28	19417	HC	HC	0	29	165	603.9	61.6	37	NaN	0	0	2	0	1	19.04.2012	1	0	0
28	19419	HC	HC	0	29	165	603.9	61.6	37	NaN	0	0	1	0	1	19.04.2012	1	0	0
28	19420	HC	HC	0	29	165	603.9	61.6	37	NaN	0	0	3	0	1	19.04.2012	1	0	0
29	29878	HC	HC	0	44	164	584.8	59.6	38	NaN	1	0	2	0	1	29.01.2015	1	1	0
29	29879	HC	HC	0	44	164	584.8	59.6	38	NaN	1	0	1	0	1	29.01.2015	1	0	0
29	29880	HC	HC	0	44	164	584.8	59.6	38	NaN	1	0	3	0	1	29.01.2015	1	0	0
29	30046	HC	HC	0	44	164	574.3	58.5	38	NaN	1	0	3	0	1	29.01.2015	1	0	0
30	29483	HC	HC	0	51	164	627.5	64	39	NaN	1	0	2	0	1	17.12.2014	0	0	1
30	29484	HC	HC	0	51	164	628	64	39	NaN	1	0	1	0	1	17.12.2014	0	0	1
30	29485	HC	HC	0	51	164	628	64	39	NaN	1	0	3	0	1	17.12.2014	0	0	1
31	30021	HC	HC	1	17	189	1404.5	143.2	39	NaN	1	0	2	0	1	10.02.2015	0	0	1
31	30022	HC	HC	1	17	189	1404.2	143.1	39	NaN	1	0	3	0	1	10.02.2015	0	0	1
31	30023	HC	HC	1	17	189	1404.3	143.1	39	NaN	1	0	1	0	1	10.02.2015	0	0	1
32	30280	HC	HC	1	51	175	979.4	99.8	43	NaN	1	0	2	0	1	26.02.2015	1	1	0
32	30281	HC	HC	1	51	175	981.6	100.1	43	NaN	1	0	3	0	1	26.02.2015	1	0	0
32	30282	HC	HC	1	51	175	980.6	100	43	NaN	1	0	1	0	1	26.02.2015	1	0	0
33	39723	HC	HC	1	55	186	897.9	91.5	43	NaN	1	0	1	0	1	28.07.2017	1	0	0
33	39724	HC	HC	1	55	186	897.9	91.5	43	NaN	1	0	3	0	1	28.07.2017	1	0	0
33	39722	HC	HC	1	55	186	897.9	91.5	43	NaN	1	0	2	0	1	28.07.2017	1	1	0
34	30689	HC	HC	0	16	160	598.9	61	38	NaN	1	0	2	0	1	30.03.2015	0	0	1
34	30690	HC	HC	0	16	160	598.9	61	38	NaN	1	0	1	0	1	30.03.2015	0	0	1
34	30692	HC	HC	0	16	160	599	61.1	38	NaN	1	0	3	0	1	30.03.2015	0	0	1
35	19421	HC	HC	0	35	173	633.5	64.6	40	NaN	1	0	2	0	1	19.04.2012	1	1	0
35	19422	HC	HC	0	35	173	633.5	64.6	40	NaN	1	0	3	0	1	19.04.2012	1	0	0
35	19423	HC	HC	0	35	173	633.5	64.6	40	NaN	1	0	1	0	1	19.04.2012	1	0	0
35	19424	HC	HC	0	35	173	628	64	40	NaN	0	0	2	0	1	19.04.2012	1	0	0
35	19425	HC	HC	0	35	173	628	64	40	NaN	0	0	3	0	1	19.04.2012	1	0	0
35	19426	HC	HC	0	35	173	628	64	40	NaN	0	0	1	0	1	19.04.2012	1	0	0
36	19729	HC	HC	1	54	176	806.7	82.2	40	NaN	1	0	2	0	1	04.05.2012	1	1	0
36	19730	HC	HC	1	54	176	806.7	82.2	40	NaN	1	0	3	0	1	04.05.2012	1	0	0
36	19731	HC	HC	1	54	176	806.7	82.2	40	NaN	1	0	1	0	1	04.05.2012	1	0	0
36	19732	HC	HC	1	54	176	798.8	81.4	40	NaN	0	0	2	0	1	04.05.2012	1	0	0
36	19733	HC	HC	1	54	176	798.8	81.4	40	NaN	0	0	3	0	1	04.05.2012	1	0	0
36	19734	HC	HC	1	54	176	798.8	81.4	40	NaN	0	0	1	0	1	04.05.2012	1	0	0
37	40009	HC	HC	0	33	165	613.6	62.5	38	NaN	1	0	1	0	1	25.08.2017	1	0	0
37	40010	HC	HC	0	33	165	613.6	62.5	38	NaN	1	0	3	0	1	25.08.2017	1	0	0
37	40008	HC	HC	0	33	165	613.6	62.5	38	NaN	1	0	2	0	1	25.08.2017	1	1	0
38	30024	HC	HC	1	17	178	721.4	73.5	43	NaN	1	0	2	0	1	10.02.2015	0	0	1
38	30025	HC	HC	1	17	178	724.2	73.8	43	NaN	1	0	3	0	1	10.02.2015	0	0	1
38	30026	HC	HC	1	17	178	724.9	73.9	43	NaN	1	0	1	0	1	10.02.2015	0	0	1
39	19957	HC	HC	0	29	163	965.4	98.4	40	NaN	1	0	2	0	1	15.05.2012	1	1	0
39	19958	HC	HC	0	29	163	965.4	98.4	40	NaN	1	0	3	0	1	15.05.2012	1	0	0
39	19959	HC	HC	0	29	163	965.4	98.4	40	NaN	1	0	1	0	1	15.05.2012	1	0	0
39	19960	HC	HC	0	29	163	958.5	97.7	40	NaN	0	0	2	0	1	15.05.2012	1	0	0
39	19961	HC	HC	0	29	163	958.5	97.7	40	NaN	0	0	3	0	1	15.05.2012	1	0	0
39	19962	HC	HC	0	29	163	958.5	97.7	40	NaN	0	0	1	0	1	15.05.2012	1	0	0
40	39897	HC	HC	1	35	182	804.8	82	48	NaN	1	0	1	0	1	16.08.2017	1	0	0
40	39896	HC	HC	1	35	182	804.8	82	48	NaN	1	0	3	0	1	16.08.2017	1	0	0
40	39895	HC	HC	1	35	182	804.8	82	48	NaN	1	0	2	0	1	16.08.2017	1	1	0
41	19480	HC	HC	0	24	163	699	71.3	39	NaN	1	0	2	0	1	23.04.2012	1	1	0
41	19482	HC	HC	0	24	163	699	71.3	39	NaN	1	0	3	0	1	23.04.2012	1	0	0
41	19483	HC	HC	0	24	163	699	71.3	39	NaN	1	0	1	0	1	23.04.2012	1	0	0
41	19484	HC	HC	0	24	163	694.7	70.8	39	NaN	0	0	1	0	1	23.04.2012	1	0	0
41	19485	HC	HC	0	24	163	694.7	70.8	39	NaN	0	0	2	0	1	23.04.2012	1	0	0
41	19486	HC	HC	0	24	163	694.7	70.8	39	NaN	0	0	3	0	1	23.04.2012	1	0	0
42	30825	HC	HC	0	67	160	770.2	78.5	38	NaN	1	0	2	0	1	09.04.2015	1	1	0
42	30826	HC	HC	0	67	160	770	78.5	38	NaN	1	0	3	0	1	09.04.2015	1	0	0
42	30827	HC	HC	0	67	160	770.1	78.5	38	NaN	1	0	1	0	1	09.04.2015	1	0	0
43	39703	HC	HC	1	55	178	824.7	84.1	43	NaN	1	0	1	0	1	27.07.2017	0	0	1
43	39704	HC	HC	1	55	178	824.7	84.1	43	NaN	1	0	3	0	1	27.07.2017	0	0	1
43	39702	HC	HC	1	55	178	824.7	84.1	43	NaN	1	0	2	0	1	27.07.2017	0	0	1
44	30042	HC	HC	1	17	180	617.9	63	44	NaN	1	0	2	0	1	10.02.2015	0	0	1
44	30043	HC	HC	1	17	180	618	63	44	NaN	1	0	3	0	1	10.02.2015	0	0	1
44	30044	HC	HC	1	17	180	618.7	63.1	44	NaN	1	0	1	0	1	10.02.2015	0	0	1
45	19837	HC	HC	0	29	165	623.4	63.5	37	NaN	1	0	2	0	1	09.05.2012	1	1	0
45	19838	HC	HC	0	29	165	623.4	63.5	37	NaN	1	0	3	0	1	09.05.2012	1	0	0
45	19839	HC	HC	0	29	165	623.4	63.5	37	NaN	1	0	1	0	1	09.05.2012	1	0	0
45	19840	HC	HC	0	29	165	618.6	63.1	37	NaN	0	0	2	0	1	09.05.2012	1	0	0
45	19841	HC	HC	0	29	165	618.6	63.1	37	NaN	0	0	3	0	1	09.05.2012	1	0	0
45	19842	HC	HC	0	29	165	618.6	63.1	37	NaN	0	0	1	0	1	09.05.2012	1	0	0
46	30822	HC	HC	1	71	176	780.3	79.5	44	NaN	1	0	2	0	1	09.04.2015	1	1	0
46	30823	HC	HC	1	71	176	779.7	79.5	44	NaN	1	0	3	0	1	09.04.2015	1	0	0
46	30824	HC	HC	1	71	176	780.5	79.6	44	NaN	1	0	1	0	1	09.04.2015	1	0	0
47	29500	HC	HC	1	37	182	883.3	90	44	NaN	1	0	2	0	1	18.12.2014	0	0	1
47	29501	HC	HC	1	37	182	883	90	44	NaN	1	0	1	0	1	18.12.2014	0	0	1
47	29502	HC	HC	1	37	182	883	90	44	NaN	1	0	3	0	1	18.12.2014	0	0	1
48	19440	HC	HC	1	37	175	889.9	90.7	43	NaN	1	0	2	0	1	19.04.2012	1	1	0
48	19441	HC	HC	1	37	175	889.9	90.7	43	NaN	1	0	3	0	1	19.04.2012	1	0	0
48	19442	HC	HC	1	37	175	889.9	90.7	43	NaN	1	0	1	0	1	19.04.2012	1	0	0
48	19443	HC	HC	1	37	175	881.9	89.9	43	NaN	0	0	2	0	1	19.04.2012	1	0	0
48	19444	HC	HC	1	37	175	881.9	89.9	43	NaN	0	0	3	0	1	19.04.2012	1	0	0
48	19445	HC	HC	1	37	175	881.9	89.9	43	NaN	0	0	1	0	1	19.04.2012	1	0	0
49	30253	HC	HC	0	27	175	677.3	69	41	NaN	1	0	2	0	1	26.02.2015	1	1	0
49	30255	HC	HC	0	27	175	677	69	41	NaN	1	0	1	0	1	26.02.2015	1	0	0
49	30256	HC	HC	0	27	175	677	69	41	NaN	1	0	3	0	1	26.02.2015	1	0	0
50	39690	HC	HC	1	57	176	955.8	97.4	43	NaN	1	0	1	0	1	27.07.2017	0	0	1
50	39691	HC	HC	1	57	176	955.8	97.4	43	NaN	1	0	3	0	1	27.07.2017	0	0	1
50	39689	HC	HC	1	57	176	956.2	97.5	43	NaN	1	0	2	0	1	27.07.2017	0	0	1
51	30294	HC	HC	1	39	184	909.9	92.8	43	NaN	1	0	2	0	1	27.02.2015	1	1	0
51	30295	HC	HC	1	39	184	909.9	92.8	43	NaN	1	0	1	0	1	27.02.2015	1	0	0
51	30297	HC	HC	1	39	184	909.9	92.8	43	NaN	1	0	3	0	1	27.02.2015	1	0	0
52	30599	HC	HC	0	24	165	578.7	59	39	NaN	1	0	2	0	1	23.03.2015	1	1	0
52	30601	HC	HC	0	24	165	578.7	59	39	NaN	1	0	1	0	1	23.03.2015	1	0	0
52	30602	HC	HC	0	24	165	578.7	59	39	NaN	1	0	3	0	1	23.03.2015	1	0	0
53	19575	HC	HC	0	49	160	552.4	56.3	38	NaN	1	0	2	0	1	25.04.2012	1	1	0
53	19576	HC	HC	0	49	160	552.4	56.3	38	NaN	1	0	3	0	1	25.04.2012	1	0	0
53	19577	HC	HC	0	49	160	552.4	56.3	38	NaN	1	0	1	0	1	25.04.2012	1	0	0
53	19578	HC	HC	0	49	160	545	55.6	38	NaN	0	0	2	0	1	25.04.2012	1	0	0
53	19579	HC	HC	0	49	160	545	55.6	38	NaN	0	0	3	0	1	25.04.2012	1	0	0
53	19580	HC	HC	0	49	160	545	55.6	38	NaN	0	0	1	0	1	25.04.2012	1	0	0
54	20056	HC	HC	1	50	186	977.6	99.7	46	NaN	1	0	2	0	1	23.05.2012	0	0	1
54	20057	HC	HC	1	50	186	977.6	99.7	46	NaN	1	0	3	0	1	23.05.2012	0	0	1
54	20059	HC	HC	1	50	186	970.4	98.9	46	NaN	0	0	2	0	1	23.05.2012	0	0	1
54	20060	HC	HC	1	50	186	970.4	98.9	46	NaN	0	0	3	0	1	23.05.2012	0	0	1
54	20061	HC	HC	1	50	186	970.4	98.9	46	NaN	0	0	1	0	1	23.05.2012	0	0	1
55	30283	HC	HC	0	53	172	779.6	79.5	39	NaN	1	0	2	0	1	26.02.2015	1	1	0
55	30284	HC	HC	0	53	172	778.8	79.4	39	NaN	1	0	3	0	1	26.02.2015	1	0	0
55	30285	HC	HC	0	53	172	777.9	79.3	39	NaN	1	0	1	0	1	26.02.2015	1	0	0
56	30286	HC	HC	1	52	180	1028.8	104.9	43	NaN	1	0	2	0	1	26.02.2015	0	0	1
56	30287	HC	HC	1	52	180	1028.1	104.8	43	NaN	1	0	3	0	1	26.02.2015	0	0	1
56	30288	HC	HC	1	52	180	1029.6	105	43	NaN	1	0	1	0	1	26.02.2015	0	0	1
57	20050	HC	HC	1	23	181	794.9	81	44.5	NaN	1	0	2	0	1	23.05.2012	1	1	0
57	20051	HC	HC	1	23	181	794.9	81	44.5	NaN	1	0	3	0	1	23.05.2012	1	0	0
57	20052	HC	HC	1	23	181	794.9	81	44.5	NaN	1	0	1	0	1	23.05.2012	1	0	0
57	20053	HC	HC	1	23	181	788	80.3	44.5	NaN	0	0	2	0	1	23.05.2012	1	0	0
57	20054	HC	HC	1	23	181	788	80.3	44.5	NaN	0	0	3	0	1	23.05.2012	1	0	0
57	20055	HC	HC	1	23	181	788	80.3	44.5	NaN	0	0	1	0	1	23.05.2012	1	0	0
58	30381	HC	HC	1	36	185	909.5	92.7	43	NaN	1	0	2	0	1	05.03.2015	0	0	1
58	30382	HC	HC	1	36	185	910	92.8	43	NaN	1	0	1	0	1	05.03.2015	0	0	1
58	30383	HC	HC	1	36	185	910	92.8	43	NaN	1	0	3	0	1	05.03.2015	0	0	1
59	888812543	HC	HC	1	55	186	832.8	84.9	44	NaN	1	0	1	0	1	03.08.2017	0	0	1
59	888812544	HC	HC	1	55	186	826.5	84.3	44	NaN	1	0	3	0	1	03.08.2017	0	0	1
59	888812542	HC	HC	1	55	186	833.4	85	44	NaN	1	0	2	0	1	03.08.2017	0	0	1
60	30174	HC	HC	0	28	175	641.2	65.4	39	NaN	1	0	2	0	1	23.02.2015	1	1	0
60	30176	HC	HC	0	28	175	641.2	65.4	39	NaN	1	0	1	0	1	23.02.2015	1	0	0
60	30177	HC	HC	0	28	175	641.2	65.4	39	NaN	1	0	3	0	1	23.02.2015	1	0	0
61	30405	HC	HC	1	43	182	728.8	74.3	42	NaN	1	0	2	0	1	06.03.2015	1	1	0
61	30406	HC	HC	1	43	182	729	74.3	42	NaN	1	0	1	0	1	06.03.2015	1	0	0
61	30407	HC	HC	1	43	182	729	74.3	42	NaN	1	0	3	0	1	06.03.2015	1	0	0
62	29890	HC	HC	1	17	176	696.6	71	43	NaN	1	0	2	0	1	29.01.2015	1	1	0
62	29891	HC	HC	1	17	176	695.8	70.9	43	NaN	1	0	1	0	1	29.01.2015	1	0	0
62	29892	HC	HC	1	17	176	697.2	71.1	43	NaN	1	0	3	0	1	29.01.2015	1	0	0
63	29786	HC	HC	0	26	176	645.7	65.8	40	NaN	1	0	2	0	1	26.01.2015	1	1	0
63	29787	HC	HC	0	26	176	645.7	65.8	40	NaN	1	0	1	0	1	26.01.2015	1	0	0
63	29788	HC	HC	0	26	176	645.7	65.8	40	NaN	1	0	3	0	1	26.01.2015	1	0	0
64	29884	HC	HC	0	45	162	553	56.4	36	NaN	1	0	2	0	1	29.01.2015	1	1	0
64	29887	HC	HC	0	45	162	552.7	56.3	36	NaN	1	0	1	0	1	29.01.2015	1	0	0
64	29889	HC	HC	0	45	162	552.7	56.3	36	NaN	1	0	3	0	1	29.01.2015	1	0	0
65	30563	HC	HC	0	15	166	557.3	56.8	39	NaN	1	0	2	0	1	20.03.2015	0	0	1
65	30564	HC	HC	0	15	166	557.3	56.8	39	NaN	1	0	1	0	1	20.03.2015	0	0	1
65	30565	HC	HC	0	15	166	557.3	56.8	39	NaN	1	0	3	0	1	20.03.2015	0	0	1
66	30566	HC	HC	0	17	172	591	60.2	39	NaN	1	0	2	0	1	20.03.2015	1	1	0
66	30567	HC	HC	0	17	172	591	60.2	39	NaN	1	0	1	0	1	20.03.2015	1	0	0
66	30569	HC	HC	0	17	172	591	60.2	39	NaN	1	0	3	0	1	20.03.2015	1	0	0
67	19645	HC	HC	1	28	172	674.9	68.8	42	NaN	1	0	2	0	1	27.04.2012	0	0	1
67	19646	HC	HC	1	28	172	674.9	68.8	42	NaN	1	0	3	0	1	27.04.2012	0	0	1
67	19647	HC	HC	1	28	172	674.9	68.8	42	NaN	1	0	1	0	1	27.04.2012	0	0	1
67	19648	HC	HC	1	28	172	667.3	68	42	NaN	0	0	2	0	1	27.04.2012	0	0	1
67	19649	HC	HC	1	28	172	667.3	68	42	NaN	0	0	3	0	1	27.04.2012	0	0	1
67	19650	HC	HC	1	28	172	667.3	68	42	NaN	0	0	1	0	1	27.04.2012	0	0	1
68	888812546	HC	HC	0	55	172	599.5	61.1	39	NaN	1	0	1	0	1	03.08.2017	1	0	0
68	888812547	HC	HC	0	55	172	600.2	61.2	39	NaN	1	0	3	0	1	03.08.2017	1	0	0
68	888812545	HC	HC	0	55	172	599.9	61.2	39	NaN	1	0	2	0	1	03.08.2017	1	1	0
69	19945	HC	HC	0	43	176	629.2	64.1	41	NaN	1	0	2	0	1	15.05.2012	1	1	0
69	19946	HC	HC	0	43	176	629.2	64.1	41	NaN	1	0	3	0	1	15.05.2012	1	0	0
69	19947	HC	HC	0	43	176	629.2	64.1	41	NaN	1	0	1	0	1	15.05.2012	1	0	0
69	19948	HC	HC	0	43	176	620.4	63.2	41	NaN	0	0	2	0	1	15.05.2012	1	0	0
69	19949	HC	HC	0	43	176	620.4	63.2	41	NaN	0	0	3	0	1	15.05.2012	1	0	0
69	19950	HC	HC	0	43	176	620.4	63.2	41	NaN	0	0	1	0	1	15.05.2012	1	0	0
70	20255	HC	HC	0	26	166.5	660	67.3	40	NaN	1	0	2	0	1	13.06.2012	1	1	0
70	20256	HC	HC	0	26	166.5	660	67.3	40	NaN	1	0	3	0	1	13.06.2012	1	0	0
70	20257	HC	HC	0	26	166.5	660	67.3	40	NaN	1	0	1	0	1	13.06.2012	1	0	0
70	20258	HC	HC	0	26	166.5	653.5	66.6	40	NaN	0	0	2	0	1	13.06.2012	1	0	0
70	20259	HC	HC	0	26	166.5	653.5	66.6	40	NaN	0	0	3	0	1	13.06.2012	1	0	0
70	20260	HC	HC	0	26	166.5	653.5	66.6	40	NaN	0	0	1	0	1	13.06.2012	1	0	0
71	888812540	HC	HC	1	33	187	883.2	90	44	NaN	1	0	1	0	1	03.08.2017	1	0	0
71	888812541	HC	HC	1	33	187	883.6	90.1	44	NaN	1	0	3	0	1	03.08.2017	1	0	0
71	888812539	HC	HC	1	33	187	884.2	90.1	44	NaN	1	0	2	0	1	03.08.2017	1	1	0
72	29863	HC	HC	0	17	173	646.6	65.9	39	NaN	1	0	2	0	1	29.01.2015	0	0	1
72	29865	HC	HC	0	17	173	645.6	65.8	39	NaN	1	0	1	0	1	29.01.2015	0	0	1
72	29866	HC	HC	0	17	173	647.6	66	39	NaN	1	0	3	0	1	29.01.2015	0	0	1
73	30015	HC	HC	1	18	184	681.8	69.5	42	NaN	1	0	2	0	1	10.02.2015	0	0	1
73	30016	HC	HC	1	18	184	682.5	69.6	42	NaN	1	0	3	0	1	10.02.2015	0	0	1
73	30017	HC	HC	1	18	184	683.3	69.7	42	NaN	1	0	1	0	1	10.02.2015	0	0	1
74	30202	HC	HC	1	29	178	709.2	72.3	43	NaN	1	0	2	0	1	24.02.2015	1	1	0
74	30203	HC	HC	1	29	178	709.2	72.3	43	NaN	1	0	1	0	1	24.02.2015	1	0	0
74	30204	HC	HC	1	29	178	709.2	72.3	43	NaN	1	0	3	0	1	24.02.2015	1	0	0
75	29881	HC	HC	0	18	165	619.6	63.2	37	NaN	1	0	2	0	1	29.01.2015	1	1	0
75	29882	HC	HC	0	18	165	620	63.2	37	NaN	1	0	1	0	1	29.01.2015	1	0	0
75	29883	HC	HC	0	18	165	618.7	63.1	37	NaN	1	0	3	0	1	29.01.2015	1	0	0
76	30267	HC	HC	0	20	162	570.4	58.1	37	NaN	1	0	2	0	1	26.02.2015	1	1	0
76	30268	HC	HC	0	20	162	570.1	58.1	37	NaN	1	0	3	0	1	26.02.2015	1	0	0
76	30269	HC	HC	0	20	162	570.8	58.2	37	NaN	1	0	1	0	1	26.02.2015	1	0	0
77	30638	HC	HC	0	48	168	541	55.1	38	NaN	1	0	2	0	1	25.03.2015	1	1	0
77	30639	HC	HC	0	48	168	541	55.1	38	NaN	1	0	1	0	1	25.03.2015	1	0	0
77	30640	HC	HC	0	48	168	541	55.1	38	NaN	1	0	3	0	1	25.03.2015	1	0	0
78	30641	HC	HC	0	19	165	644.4	65.7	38	NaN	1	0	2	0	1	25.03.2015	1	1	0
78	30642	HC	HC	0	19	165	644.4	65.7	38	NaN	1	0	1	0	1	25.03.2015	1	0	0
78	30643	HC	HC	0	19	165	644.4	65.7	38	NaN	1	0	3	0	1	25.03.2015	1	0	0
79	19700	HC	HC	1	39	175	660.5	67.3	43	NaN	1	0	2	0	1	03.05.2012	1	1	0
79	19701	HC	HC	1	39	175	660.5	67.3	43	NaN	1	0	3	0	1	03.05.2012	1	0	0
79	19702	HC	HC	1	39	175	660.5	67.3	43	NaN	1	0	1	0	1	03.05.2012	1	0	0
79	19703	HC	HC	1	39	175	652.9	66.6	43	NaN	0	0	2	0	1	03.05.2012	1	0	0
79	19704	HC	HC	1	39	175	652.9	66.6	43	NaN	0	0	3	0	1	03.05.2012	1	0	0
79	19705	HC	HC	1	39	175	652.9	66.6	43	NaN	0	0	1	0	1	03.05.2012	1	0	0
80	30875	HC	HC	0	65	171	627.8	64	40	NaN	1	0	2	0	1	13.04.2015	1	1	0
80	30877	HC	HC	0	65	171	628.1	64	40	NaN	1	0	3	0	1	13.04.2015	1	0	0
80	30878	HC	HC	0	65	171	628.9	64.1	40	NaN	1	0	1	0	1	13.04.2015	1	0	0
81	19809	HC	HC	0	29	162	566.7	57.8	38	NaN	1	0	2	0	1	08.05.2012	1	1	0
81	19810	HC	HC	0	29	162	566.7	57.8	38	NaN	1	0	3	0	1	08.05.2012	1	0	0
81	19811	HC	HC	0	29	162	566.7	57.8	38	NaN	1	0	1	0	1	08.05.2012	1	0	0
81	19812	HC	HC	0	29	162	558.8	57	38	NaN	0	0	2	0	1	08.05.2012	1	0	0
81	19813	HC	HC	0	29	162	558.8	57	38	NaN	0	0	3	0	1	08.05.2012	1	0	0
81	19814	HC	HC	0	29	162	558.8	57	38	NaN	0	0	1	0	1	08.05.2012	1	0	0
82	19550	HC	HC	1	25	175	699.4	71.3	42	NaN	1	0	2	0	1	24.04.2012	1	1	0
82	19551	HC	HC	1	25	175	699.4	71.3	42	NaN	1	0	3	0	1	24.04.2012	1	0	0
82	19552	HC	HC	1	25	175	699.4	71.3	42	NaN	1	0	1	0	1	24.04.2012	1	0	0
82	19553	HC	HC	1	25	175	691.3	70.5	42	NaN	0	0	2	0	1	24.04.2012	1	0	0
82	19554	HC	HC	1	25	175	691.3	70.5	42	NaN	0	0	3	0	1	24.04.2012	1	0	0
82	19555	HC	HC	1	25	175	691.3	70.5	42	NaN	0	0	1	0	1	24.04.2012	1	0	0
83	20027	HC	HC	1	52	191	876.8	89.4	46.5	NaN	1	0	2	0	1	22.05.2012	1	1	0
83	20028	HC	HC	1	52	191	876.8	89.4	46.5	NaN	1	0	3	0	1	22.05.2012	1	0	0
83	20029	HC	HC	1	52	191	876.8	89.4	46.5	NaN	1	0	1	0	1	22.05.2012	1	0	0
83	20030	HC	HC	1	52	191	868.6	88.5	46.5	NaN	0	0	2	0	1	22.05.2012	1	0	0
83	20031	HC	HC	1	52	191	868.6	88.5	46.5	NaN	0	0	3	0	1	22.05.2012	1	0	0
83	20032	HC	HC	1	52	191	868.6	88.5	46.5	NaN	0	0	1	0	1	22.05.2012	1	0	0
84	30270	HC	HC	0	19	165	548.8	55.9	38	NaN	1	0	2	0	1	26.02.2015	1	1	0
84	30271	HC	HC	0	19	165	549.3	56	38	NaN	1	0	3	0	1	26.02.2015	1	0	0
84	30272	HC	HC	0	19	165	549.5	56	38	NaN	1	0	1	0	1	26.02.2015	1	0	0
85	39963	HC	HC	0	47	165	780.2	79.5	39	NaN	1	0	1	0	1	22.08.2017	1	0	0
85	39964	HC	HC	0	47	165	780.2	79.5	39	NaN	1	0	3	0	1	22.08.2017	1	0	0
85	39962	HC	HC	0	47	165	780.2	79.5	39	NaN	1	0	2	0	1	22.08.2017	1	1	0
86	29729	HC	HC	1	32	173	726.3	74	43	NaN	1	0	2	0	1	21.01.2015	1	1	0
86	29730	HC	HC	1	32	173	724	73.8	43	NaN	1	0	1	0	1	21.01.2015	1	0	0
86	29731	HC	HC	1	32	173	724	73.8	43	NaN	1	0	3	0	1	21.01.2015	1	0	0
87	30657	HC	HC	0	39	164	561.4	57.2	37	NaN	1	0	2	0	1	26.03.2015	1	1	0
87	30658	HC	HC	0	39	164	561.4	57.2	37	NaN	1	0	1	0	1	26.03.2015	1	0	0
87	30659	HC	HC	0	39	164	561.4	57.2	37	NaN	1	0	3	0	1	26.03.2015	1	0	0
88	30027	HC	HC	1	17	180	806.1	82.2	45	NaN	1	0	2	0	1	10.02.2015	1	1	0
88	30028	HC	HC	1	17	180	805.3	82.1	45	NaN	1	0	3	0	1	10.02.2015	1	0	0
88	30029	HC	HC	1	17	180	806.1	82.2	45	NaN	1	0	1	0	1	10.02.2015	1	0	0
89	30519	HC	HC	0	35	165	612.7	62.5	38	NaN	1	0	2	0	1	17.03.2015	0	0	1
89	30520	HC	HC	0	35	165	612.7	62.5	38	NaN	1	0	1	0	1	17.03.2015	0	0	1
89	30521	HC	HC	0	35	165	612.7	62.5	38	NaN	1	0	3	0	1	17.03.2015	0	0	1
90	30571	HC	HC	0	17	166	646.8	65.9	39	NaN	1	0	2	0	1	20.03.2015	1	1	0
90	30572	HC	HC	0	17	166	646.8	65.9	39	NaN	1	0	1	0	1	20.03.2015	1	0	0
90	30573	HC	HC	0	17	166	646.8	65.9	39	NaN	1	0	3	0	1	20.03.2015	1	0	0
91	30334	HC	HC	1	57	176	930.9	94.9	42	NaN	1	0	2	0	1	03.03.2015	1	1	0
91	30335	HC	HC	1	57	176	930.9	94.9	42	NaN	1	0	1	0	1	03.03.2015	1	0	0
91	30336	HC	HC	1	57	176	930.9	94.9	42	NaN	1	0	3	0	1	03.03.2015	1	0	0
92	30574	HC	HC	0	17	164	553.8	56.5	36	NaN	1	0	2	0	1	20.03.2015	1	1	0
92	30575	HC	HC	0	17	164	553.8	56.5	36	NaN	1	0	1	0	1	20.03.2015	1	0	0
92	30576	HC	HC	0	17	164	553.8	56.5	36	NaN	1	0	3	0	1	20.03.2015	1	0	0
93	999910375	HC	HC	0	53	178	670.9	68.4	40	NaN	0	0	3	0	1	28.08.2017	1	0	0
93	999910374	HC	HC	0	53	178	672.1	68.5	40	NaN	0	0	1	0	1	28.08.2017	1	0	0
93	999910373	HC	HC	0	53	178	672.6	68.6	40	NaN	0	0	2	0	1	28.08.2017	1	0	0
94	29476	HC	HC	0	53	169	758.2	77.3	39	NaN	1	0	2	0	1	17.12.2014	1	1	0
94	29478	HC	HC	0	53	169	758	77.3	39	NaN	1	0	3	0	1	17.12.2014	1	0	0
95	19815	HC	HC	0	52	170	1060.5	108.1	41	NaN	1	0	2	0	1	08.05.2012	1	1	0
95	19816	HC	HC	0	52	170	1060.5	108.1	41	NaN	1	0	3	0	1	08.05.2012	1	0	0
95	19818	HC	HC	0	52	170	1054.7	107.5	41	NaN	0	0	2	0	1	08.05.2012	1	0	0
95	19819	HC	HC	0	52	170	1054.7	107.5	41	NaN	0	0	3	0	1	08.05.2012	1	0	0
96	999910370	HC	HC	0	33	155	475.8	48.5	36	NaN	0	0	3	0	1	28.08.2017	1	0	0
96	999910369	HC	HC	0	33	155	476.2	48.5	36	NaN	0	0	1	0	1	28.08.2017	1	0	0
96	999910368	HC	HC	0	33	155	405.1	41.3	36	NaN	0	0	2	0	1	28.08.2017	1	0	0
97	19795	HC	HC	0	27	164	575.2	58.6	37	NaN	1	0	2	0	1	08.05.2012	1	1	0
97	19796	HC	HC	0	27	164	575.2	58.6	37	NaN	1	0	3	0	1	08.05.2012	1	0	0
97	19797	HC	HC	0	27	164	575.2	58.6	37	NaN	1	0	1	0	1	08.05.2012	1	0	0
97	19798	HC	HC	0	27	164	570.9	58.2	37	NaN	0	0	2	0	1	08.05.2012	1	0	0
97	19799	HC	HC	0	27	164	570.9	58.2	37	NaN	0	0	3	0	1	08.05.2012	1	0	0
97	19800	HC	HC	0	27	164	570.9	58.2	37	NaN	0	0	1	0	1	08.05.2012	1	0	0
98	30076	HC	HC	0	55	161	536.5	54.7	37	NaN	1	0	2	0	1	12.02.2015	0	0	1
98	30077	HC	HC	0	55	161	536.5	54.7	37	NaN	1	0	1	0	1	12.02.2015	0	0	1
98	30078	HC	HC	0	55	161	536.5	54.7	37	NaN	1	0	3	0	1	12.02.2015	0	0	1
99	30261	HC	HC	1	20	182	831.6	84.8	44	NaN	1	0	2	0	1	26.02.2015	1	1	0
99	30262	HC	HC	1	20	182	830.8	84.7	44	NaN	1	0	3	0	1	26.02.2015	1	0	0
99	30263	HC	HC	1	20	182	830.3	84.6	44	NaN	1	0	1	0	1	26.02.2015	1	0	0
100	30701	HC	HC	0	18	162	534.7	54.5	38	NaN	1	0	2	0	1	30.03.2015	1	1	0
100	30702	HC	HC	0	18	162	535	54.5	38	NaN	1	0	1	0	1	30.03.2015	1	0	0
100	30704	HC	HC	0	18	162	535	54.5	38	NaN	1	0	3	0	1	30.03.2015	1	0	0
101	30418	HC	HC	0	27	174	761	77.6	41	NaN	1	0	2	0	1	09.03.2015	0	0	1
101	30419	HC	HC	0	27	174	761	77.6	41	NaN	1	0	1	0	1	09.03.2015	0	0	1
101	30420	HC	HC	0	27	174	761	77.6	41	NaN	1	0	3	0	1	09.03.2015	0	0	1
102	39711	HC	HC	0	47	170	1044.5	106.5	40	NaN	1	0	1	0	1	27.07.2017	1	0	0
102	39712	HC	HC	0	47	170	1044.5	106.5	40	NaN	1	0	3	0	1	27.07.2017	1	0	0
102	39710	HC	HC	0	47	170	1044.5	106.5	40	NaN	1	0	2	0	1	27.07.2017	1	1	0
103	19392	HC	HC	1	53	182	850.1	86.7	43.5	NaN	1	0	2	0	1	18.04.2012	1	1	0
103	19393	HC	HC	1	53	182	848.8	86.5	43.5	NaN	1	0	3	0	1	18.04.2012	1	0	0
103	19394	HC	HC	1	53	182	848.8	86.5	43.5	NaN	1	0	1	0	1	18.04.2012	1	0	0
103	19395	HC	HC	1	53	182	840	85.6	43.5	NaN	0	0	2	0	1	18.04.2012	1	0	0
103	19396	HC	HC	1	53	182	840	85.6	43.5	NaN	0	0	3	0	1	18.04.2012	1	0	0
103	19397	HC	HC	1	53	182	840	85.6	43.5	NaN	0	0	1	0	1	18.04.2012	1	0	0
104	29834	HC	HC	1	17	180	750	76.5	43	NaN	1	0	2	0	1	28.01.2015	1	1	0
104	29835	HC	HC	1	17	180	742.1	75.6	43	NaN	1	0	1	0	1	28.01.2015	1	0	0
104	29836	HC	HC	1	17	180	742.8	75.7	43	NaN	1	0	3	0	1	28.01.2015	1	0	0
105	19454	HC	HC	0	28	163	546.6	55.7	39	NaN	1	0	2	0	1	19.04.2012	1	1	0
105	19455	HC	HC	0	28	163	546.6	55.7	39	NaN	1	0	3	0	1	19.04.2012	1	0	0
105	19456	HC	HC	0	28	163	546.6	55.7	39	NaN	1	0	1	0	1	19.04.2012	1	0	0
105	19457	HC	HC	0	28	163	542.8	55.3	39	NaN	0	0	2	0	1	19.04.2012	1	0	0
105	19458	HC	HC	0	28	163	542.8	55.3	39	NaN	0	0	1	0	1	19.04.2012	1	0	0
105	19459	HC	HC	0	28	163	542.8	55.3	39	NaN	0	0	3	0	1	19.04.2012	1	0	0
106	30154	HC	HC	1	30	180	797.6	81.3	42	NaN	1	0	2	0	1	20.02.2015	1	1	0
106	30155	HC	HC	1	30	180	798	81.3	42	NaN	1	0	3	0	1	20.02.2015	1	0	0
106	30156	HC	HC	1	30	180	793	80.8	42	NaN	1	0	1	0	1	20.02.2015	1	0	0
107	30614	HC	HC	0	25	174	644.5	65.7	38	NaN	1	0	2	0	1	24.03.2015	1	1	0
107	30615	HC	HC	0	25	174	645	65.7	38	NaN	1	0	1	0	1	24.03.2015	1	0	0
107	30616	HC	HC	0	25	174	645	65.7	38	NaN	1	0	3	0	1	24.03.2015	1	0	0
108	40046	HC	HC	1	44	183	744.1	75.9	43	NaN	1	0	3	0	1	29.08.2017	0	0	1
108	40045	HC	HC	1	44	183	744.1	75.9	43	NaN	1	0	2	0	1	29.08.2017	0	0	1
109	30618	HC	HC	1	46	180	968.8	98.8	44	NaN	1	0	2	0	1	24.03.2015	0	0	1
109	30619	HC	HC	1	46	180	969	98.8	44	NaN	1	0	1	0	1	24.03.2015	0	0	1
109	30620	HC	HC	1	46	180	969	98.8	44	NaN	1	0	3	0	1	24.03.2015	0	0	1
110	30378	HC	HC	1	45	173	810.1	82.6	43	NaN	1	0	2	0	1	05.03.2015	1	1	0
110	30379	HC	HC	1	45	173	810	82.6	43	NaN	1	0	1	0	1	05.03.2015	1	0	0
110	30380	HC	HC	1	45	173	810	82.6	43	NaN	1	0	3	0	1	05.03.2015	1	0	0
111	40043	HC	HC	0	47	176	740.8	75.5	40	NaN	1	0	1	0	1	29.08.2017	1	0	0
111	40044	HC	HC	0	47	176	740.8	75.5	40	NaN	1	0	3	0	1	29.08.2017	1	0	0
111	40042	HC	HC	0	47	176	740.8	75.5	40	NaN	1	0	2	0	1	29.08.2017	1	1	0
112	19544	HC	HC	0	38	170	577.4	58.9	38	NaN	1	0	2	0	1	24.04.2012	1	1	0
112	19545	HC	HC	0	38	170	577.4	58.9	38	NaN	1	0	3	0	1	24.04.2012	1	0	0
112	19546	HC	HC	0	38	170	577.4	58.9	38	NaN	1	0	1	0	1	24.04.2012	1	0	0
112	19547	HC	HC	0	38	170	573.4	58.5	38	NaN	0	0	2	0	1	24.04.2012	1	0	0
112	19548	HC	HC	0	38	170	573.4	58.5	38	NaN	0	0	3	0	1	24.04.2012	1	0	0
112	19549	HC	HC	0	38	170	573.4	58.5	38	NaN	0	0	1	0	1	24.04.2012	1	0	0
113	19867	HC	HC	0	23	176	653.6	66.6	40	NaN	1	0	2	0	1	10.05.2012	1	1	0
113	19868	HC	HC	0	23	176	653.6	66.6	40	NaN	1	0	3	0	1	10.05.2012	1	0	0
113	19869	HC	HC	0	23	176	653.6	66.6	40	NaN	1	0	1	0	1	10.05.2012	1	0	0
113	19870	HC	HC	0	23	176	645.6	65.8	40	NaN	0	0	2	0	1	10.05.2012	1	0	0
113	19871	HC	HC	0	23	176	645.6	65.8	40	NaN	0	0	3	0	1	10.05.2012	1	0	0
113	19872	HC	HC	0	23	176	645.6	65.8	40	NaN	0	0	1	0	1	10.05.2012	1	0	0
114	30987	HC	HC	1	22	176	742.4	75.7	42	NaN	1	0	2	0	1	23.04.2015	0	0	1
114	30988	HC	HC	1	22	176	740.7	75.5	42	NaN	1	0	3	0	1	23.04.2015	0	0	1
114	30989	HC	HC	1	22	176	740.6	75.5	42	NaN	1	0	1	0	1	23.04.2015	0	0	1
115	30168	HC	HC	0	22	175	632.7	64.5	41	NaN	1	0	2	0	1	23.02.2015	1	1	0
115	30169	HC	HC	0	22	175	630.5	64.3	41	NaN	1	0	3	0	1	23.02.2015	1	0	0
115	30170	HC	HC	0	22	175	631.5	64.4	41	NaN	1	0	1	0	1	23.02.2015	1	0	0
116	30183	HC	HC	0	46	160	698.7	71.2	37	NaN	1	0	2	0	1	23.02.2015	1	1	0
116	30184	HC	HC	0	46	160	698.4	71.2	37	NaN	1	0	3	0	1	23.02.2015	1	0	0
116	30185	HC	HC	0	46	160	698.8	71.2	37	NaN	1	0	1	0	1	23.02.2015	1	0	0
117	19771	HC	HC	1	32	173	587.8	59.9	43	NaN	1	0	2	0	1	07.05.2012	1	1	0
117	19772	HC	HC	1	32	173	587.8	59.9	43	NaN	1	0	3	0	1	07.05.2012	1	0	0
117	19773	HC	HC	1	32	173	587.8	59.9	43	NaN	1	0	1	0	1	07.05.2012	1	0	0
117	19774	HC	HC	1	32	173	580.5	59.2	43	NaN	0	0	2	0	1	07.05.2012	1	0	0
117	19775	HC	HC	1	32	173	580.5	59.2	43	NaN	0	0	3	0	1	07.05.2012	1	0	0
117	19845	HC	HC	1	32	173	580.5	59.2	43	NaN	0	0	1	0	1	07.05.2012	1	0	0
118	30705	HC	HC	0	18	178	661	67.4	40	NaN	1	0	2	0	1	30.03.2015	0	0	1
118	30706	HC	HC	0	18	178	661	67.4	40	NaN	1	0	1	0	1	30.03.2015	0	0	1
118	30708	HC	HC	0	18	178	661	67.4	40	NaN	1	0	3	0	1	30.03.2015	0	0	1
119	30251	HC	HC	1	22	174	664.3	67.7	42	NaN	1	0	2	0	1	26.02.2015	0	0	1
119	30252	HC	HC	1	22	174	665.3	67.8	42	NaN	1	0	3	0	1	26.02.2015	0	0	1
119	30254	HC	HC	1	22	174	663.7	67.7	42	NaN	1	0	1	0	1	26.02.2015	0	0	1
120	20033	HC	HC	1	23	170	751.7	76.6	42	NaN	1	0	2	0	1	22.05.2012	1	1	0
120	20034	HC	HC	1	23	170	751.7	76.6	42	NaN	1	0	3	0	1	22.05.2012	1	0	0
120	20035	HC	HC	1	23	170	751.7	76.6	42	NaN	1	0	1	0	1	22.05.2012	1	0	0
120	20036	HC	HC	1	23	170	743.7	75.8	42	NaN	0	0	2	0	1	22.05.2012	1	0	0
120	20037	HC	HC	1	23	170	743.7	75.8	42	NaN	0	0	3	0	1	22.05.2012	1	0	0
120	20038	HC	HC	1	23	170	743.7	75.8	42	NaN	0	0	1	0	1	22.05.2012	1	0	0
121	20062	HC	HC	1	55	186	845	86.1	45.5	NaN	1	0	2	0	1	23.05.2012	1	1	0
121	20063	HC	HC	1	55	186	845	86.1	45.5	NaN	1	0	3	0	1	23.05.2012	1	0	0
121	20064	HC	HC	1	55	186	845	86.1	45.5	NaN	1	0	1	0	1	23.05.2012	1	0	0
121	20065	HC	HC	1	55	186	840.1	85.6	45.5	NaN	0	0	2	0	1	23.05.2012	1	0	0
121	20066	HC	HC	1	55	186	840.1	85.6	45.5	NaN	0	0	3	0	1	23.05.2012	1	0	0
121	20067	HC	HC	1	55	186	840.1	85.6	45.5	NaN	0	0	1	0	1	23.05.2012	1	0	0
122	19923	HC	HC	0	43	168	581.8	59.3	38.5	NaN	1	0	2	0	1	14.05.2012	1	1	0
122	19924	HC	HC	0	43	168	581.8	59.3	38.5	NaN	1	0	3	0	1	14.05.2012	1	0	0
122	19925	HC	HC	0	43	168	581.8	59.3	38.5	NaN	1	0	1	0	1	14.05.2012	1	0	0
122	19926	HC	HC	0	43	168	576.6	58.8	38.5	NaN	0	0	2	0	1	14.05.2012	1	0	0
122	19927	HC	HC	0	43	168	576.6	58.8	38.5	NaN	0	0	3	0	1	14.05.2012	1	0	0
122	19928	HC	HC	0	43	168	576.6	58.8	38.5	NaN	0	0	1	0	1	14.05.2012	1	0	0
123	30039	HC	HC	1	18	170	527.5	53.8	40	NaN	1	0	2	0	1	10.02.2015	0	0	1
123	30040	HC	HC	1	18	170	527.4	53.8	40	NaN	1	0	3	0	1	10.02.2015	0	0	1
123	30041	HC	HC	1	18	170	525.8	53.6	40	NaN	1	0	1	0	1	10.02.2015	0	0	1
124	39974	HC	HC	0	45	172	683.2	69.6	39	NaN	1	0	1	0	1	22.08.2017	1	0	0
124	39975	HC	HC	0	45	172	683.2	69.6	39	NaN	1	0	3	0	1	22.08.2017	1	0	0
124	39973	HC	HC	0	45	172	683.2	69.6	39	NaN	1	0	2	0	1	22.08.2017	1	1	0
125	19460	HC	HC	0	41	166	688.6	70.2	37	NaN	1	0	2	0	1	19.04.2012	1	1	0
125	19461	HC	HC	0	41	166	688.6	70.2	37	NaN	1	0	1	0	1	19.04.2012	1	0	0
125	19462	HC	HC	0	41	166	688.6	70.2	37	NaN	1	0	3	0	1	19.04.2012	1	0	0
125	19463	HC	HC	0	41	166	683.5	69.7	37	NaN	0	0	2	0	1	19.04.2012	1	0	0
125	19464	HC	HC	0	41	166	683.5	69.7	37	NaN	0	0	1	0	1	19.04.2012	1	0	0
125	19465	HC	HC	0	41	166	683.5	69.7	37	NaN	0	0	3	0	1	19.04.2012	1	0	0
126	30661	HC	HC	0	27	174	585.7	59.7	38	NaN	1	0	2	0	1	26.03.2015	1	1	0
126	30662	HC	HC	0	27	174	586	59.7	38	NaN	1	0	1	0	1	26.03.2015	1	0	0
126	30663	HC	HC	0	27	174	586	59.7	38	NaN	1	0	3	0	1	26.03.2015	1	0	0
127	30622	HC	HC	0	46	165	511.7	52.2	36	NaN	1	0	2	0	1	24.03.2015	1	1	0
127	30623	HC	HC	0	46	165	512	52.2	36	NaN	1	0	1	0	1	24.03.2015	1	0	0
127	30624	HC	HC	0	46	165	512	52.2	36	NaN	1	0	3	0	1	24.03.2015	1	0	0
128	19534	HC	HC	1	22	183	721.3	73.5	45	NaN	1	0	2	0	1	24.04.2012	1	1	0
128	19535	HC	HC	1	22	183	721.3	73.5	45	NaN	1	0	3	0	1	24.04.2012	1	0	0
128	19536	HC	HC	1	22	183	721.3	73.5	45	NaN	1	0	1	0	1	24.04.2012	1	0	0
128	19537	HC	HC	1	22	183	710.4	72.4	45	NaN	0	0	2	0	1	24.04.2012	1	0	0
128	19538	HC	HC	1	22	183	710.4	72.4	45	NaN	0	0	3	0	1	24.04.2012	1	0	0
128	19539	HC	HC	1	22	183	710.4	72.4	45	NaN	0	0	1	0	1	24.04.2012	1	0	0
129	19563	HC	HC	0	30	163	501	51.1	38	NaN	1	0	2	0	1	25.04.2012	0	0	1
129	19564	HC	HC	0	30	163	501	51.1	38	NaN	1	0	3	0	1	25.04.2012	0	0	1
129	19565	HC	HC	0	30	163	501	51.1	38	NaN	1	0	1	0	1	25.04.2012	0	0	1
129	19566	HC	HC	0	30	163	496.2	50.6	38	NaN	0	0	2	0	1	25.04.2012	0	0	1
129	19567	HC	HC	0	30	163	496.2	50.6	38	NaN	0	0	3	0	1	25.04.2012	0	0	1
129	19568	HC	HC	0	30	163	496.2	50.6	38	NaN	0	0	1	0	1	25.04.2012	0	0	1
130	29828	HC	HC	1	19	180	890.2	90.7	44	NaN	1	0	2	0	1	28.01.2015	1	1	0
130	29829	HC	HC	1	19	180	888.3	90.6	44	NaN	1	0	1	0	1	28.01.2015	1	0	0
130	29830	HC	HC	1	19	180	888.2	90.5	44	NaN	1	0	3	0	1	28.01.2015	1	0	0
131	19951	HC	HC	1	44	186	768.5	78.3	45	NaN	1	0	2	0	1	15.05.2012	0	0	1
131	19952	HC	HC	1	44	186	768.5	78.3	45	NaN	1	0	3	0	1	15.05.2012	0	0	1
131	19953	HC	HC	1	44	186	768.5	78.3	45	NaN	1	0	1	0	1	15.05.2012	0	0	1
131	19954	HC	HC	1	44	186	762.2	77.7	45	NaN	0	0	2	0	1	15.05.2012	0	0	1
131	19955	HC	HC	1	44	186	762.2	77.7	45	NaN	0	0	3	0	1	15.05.2012	0	0	1
131	19956	HC	HC	1	44	186	762.2	77.7	45	NaN	0	0	1	0	1	15.05.2012	0	0	1
132	999910366	HC	HC	1	35	187	909.9	92.8	42	NaN	0	0	1	0	1	28.08.2017	1	0	0
132	999910367	HC	HC	1	35	187	912.3	93	42	NaN	0	0	3	0	1	28.08.2017	1	0	0
132	999910365	HC	HC	1	35	187	908.6	92.6	42	NaN	0	0	2	0	1	28.08.2017	1	0	0
133	29831	HC	HC	1	17	186	883.2	90	47	NaN	1	0	2	0	1	28.01.2015	1	1	0
133	29832	HC	HC	1	17	186	884.5	90.2	47	NaN	1	0	1	0	1	28.01.2015	1	0	0
133	29833	HC	HC	1	17	186	885.9	90.3	47	NaN	1	0	3	0	1	28.01.2015	1	0	0
134	30981	HC	HC	1	22	187	902.4	92	44	NaN	1	0	2	0	1	23.04.2015	1	1	0
134	30982	HC	HC	1	22	187	900.7	91.8	44	NaN	1	0	3	0	1	23.04.2015	1	0	0
134	30983	HC	HC	1	22	187	899.8	91.7	44	NaN	1	0	1	0	1	23.04.2015	1	0	0
135	30984	HC	HC	0	21	163	646.4	65.9	38	NaN	1	0	2	0	1	23.04.2015	0	0	1
135	30985	HC	HC	0	21	163	646.3	65.9	38	NaN	1	0	3	0	1	23.04.2015	0	0	1
135	30986	HC	HC	0	21	163	645	65.7	38	NaN	1	0	1	0	1	23.04.2015	0	0	1
136	29665	HC	HC	0	26	165	536.6	54.7	38	NaN	1	0	2	0	1	14.01.2015	1	1	0
136	29666	HC	HC	0	26	165	537	54.7	38	NaN	1	0	1	0	1	14.01.2015	1	0	0
136	29667	HC	HC	0	26	165	537	54.7	38	NaN	1	0	3	0	1	14.01.2015	1	0	0
137	30009	HC	HC	1	17	173	615.7	62.8	42	NaN	1	0	2	0	1	10.02.2015	0	0	1
137	30010	HC	HC	1	17	173	618.3	63	42	NaN	1	0	3	0	1	10.02.2015	0	0	1
137	30011	HC	HC	1	17	173	617.1	62.9	42	NaN	1	0	1	0	1	10.02.2015	0	0	1
138	30140	HC	HC	1	20	180	742.7	75.7	43	NaN	1	0	2	0	1	19.02.2015	0	0	1
138	30141	HC	HC	1	20	180	741.7	75.6	43	NaN	1	0	3	0	1	19.02.2015	0	0	1
138	30142	HC	HC	1	20	180	742.9	75.7	43	NaN	1	0	1	0	1	19.02.2015	0	0	1
139	19639	HC	HC	0	32	172	556.4	56.7	39	NaN	1	0	2	0	1	26.04.2012	1	1	0
139	19640	HC	HC	0	32	172	556.4	56.7	39	NaN	1	0	3	0	1	26.04.2012	1	0	0
139	19641	HC	HC	0	32	172	556.4	56.7	39	NaN	1	0	1	0	1	26.04.2012	1	0	0
139	19642	HC	HC	0	32	172	550.9	56.2	39	NaN	0	0	2	0	1	26.04.2012	1	0	0
139	19643	HC	HC	0	32	172	550.9	56.2	39	NaN	0	0	3	0	1	26.04.2012	1	0	0
139	19644	HC	HC	0	32	172	550.9	56.2	39	NaN	0	0	1	0	1	26.04.2012	1	0	0
140	30149	HC	HC	1	32	190	910	92.8	46	NaN	1	0	2	0	1	20.02.2015	1	1	0
140	30150	HC	HC	1	32	190	909.7	92.7	46	NaN	1	0	3	0	1	20.02.2015	1	0	0
140	30151	HC	HC	1	32	190	909.4	92.7	46	NaN	1	0	1	0	1	20.02.2015	1	0	0
141	30384	HC	HC	0	31	183	753.6	76.8	43	NaN	1	0	2	0	1	05.03.2015	1	1	0
141	30385	HC	HC	0	31	183	756.6	77.1	43	NaN	1	0	3	0	1	05.03.2015	1	0	0
141	30386	HC	HC	0	31	183	757.4	77.2	43	NaN	1	0	1	0	1	05.03.2015	1	0	0
142	888812634	HC	HC	0	51	178	655	66.8	40	NaN	1	0	1	0	1	24.08.2017	1	0	0
142	888812635	HC	HC	0	51	178	654.6	66.7	40	NaN	1	0	3	0	1	24.08.2017	1	0	0
142	888812633	HC	HC	0	51	178	655.4	66.8	40	NaN	1	0	2	0	1	24.08.2017	1	1	0
143	30171	HC	HC	0	37	178	668.9	68.2	40	NaN	1	0	2	0	1	23.02.2015	0	0	1
143	30172	HC	HC	0	37	178	669.4	68.2	40	NaN	1	0	3	0	1	23.02.2015	0	0	1
143	30173	HC	HC	0	37	178	668.3	68.1	40	NaN	1	0	1	0	1	23.02.2015	0	0	1
144	19997	HC	HC	1	29	182	1011.2	103.1	44	NaN	1	0	2	0	1	21.05.2012	1	1	0
144	19998	HC	HC	1	29	182	1011.2	103.1	44	NaN	1	0	3	0	1	21.05.2012	1	0	0
144	19999	HC	HC	1	29	182	1011.2	103.1	44	NaN	1	0	1	0	1	21.05.2012	1	0	0
144	20000	HC	HC	1	29	182	1000.9	102	44	NaN	0	0	2	0	1	21.05.2012	1	0	0
144	20001	HC	HC	1	29	182	1000.9	102	44	NaN	0	0	3	0	1	21.05.2012	1	0	0
144	20002	HC	HC	1	29	182	1000.9	102	44	NaN	0	0	1	0	1	21.05.2012	1	0	0
145	29732	HC	HC	1	44	175	693.3	70.7	43	NaN	1	0	2	0	1	21.01.2015	1	1	0
146	29837	HC	HC	1	18	180	609.4	62.1	43	NaN	1	0	2	0	1	28.01.2015	0	0	1
146	29838	HC	HC	1	18	180	609.9	62.2	43	NaN	1	0	1	0	1	28.01.2015	0	0	1
146	29839	HC	HC	1	18	180	608.5	62	43	NaN	1	0	3	0	1	28.01.2015	0	0	1
147	30233	HC	HC	1	47	189	1108.2	113	45	NaN	1	0	2	0	1	25.02.2015	1	1	0
147	30234	HC	HC	1	47	189	1108.2	113	45	NaN	1	0	1	0	1	25.02.2015	1	0	0
147	30236	HC	HC	1	47	189	1108.2	113	45	NaN	1	0	3	0	1	25.02.2015	1	0	0
148	30257	HC	HC	1	29	173	840.5	85.7	43	NaN	1	0	2	0	1	26.02.2015	1	1	0
148	30258	HC	HC	1	29	173	841.8	85.8	43	NaN	1	0	3	0	1	26.02.2015	1	0	0
148	30260	HC	HC	1	29	173	841.7	85.8	43	NaN	1	0	1	0	1	26.02.2015	1	0	0
149	19776	HC	HC	0	26	165	711.3	72.5	38	NaN	0	0	2	0	1	07.05.2012	0	0	1
149	19777	HC	HC	0	26	165	711.3	72.5	38	NaN	0	0	3	0	1	07.05.2012	0	0	1
149	19778	HC	HC	0	26	165	711.3	72.5	38	NaN	0	0	1	0	1	07.05.2012	0	0	1
149	19801	HC	HC	0	26	165	717.2	73.1	38	NaN	1	0	2	0	1	07.05.2012	0	0	1
149	19802	HC	HC	0	26	165	717.2	73.1	38	NaN	1	0	3	0	1	07.05.2012	0	0	1
149	19803	HC	HC	0	26	165	717.2	73.1	38	NaN	1	0	1	0	1	07.05.2012	0	0	1
150	30033	HC	HC	1	18	185	679.2	69.2	46	NaN	1	0	2	0	1	10.02.2015	1	1	0
150	30034	HC	HC	1	18	185	680.7	69.4	46	NaN	1	0	3	0	1	10.02.2015	1	0	0
150	30035	HC	HC	1	18	185	678.9	69.2	46	NaN	1	0	1	0	1	10.02.2015	1	0	0
151	30179	HC	HC	0	23	171	603.2	61.5	39	NaN	1	0	2	0	1	23.02.2015	1	1	0
151	30180	HC	HC	0	23	171	603.2	61.5	39	NaN	1	0	1	0	1	23.02.2015	1	0	0
151	30182	HC	HC	0	23	171	603.2	61.5	39	NaN	1	0	3	0	1	23.02.2015	1	0	0
152	30006	HC	HC	1	19	180	745	75.9	43	NaN	1	0	2	0	1	10.02.2015	1	1	0
152	30007	HC	HC	1	19	180	745.6	76	43	NaN	1	0	3	0	1	10.02.2015	1	0	0
152	30008	HC	HC	1	19	180	745.4	76	43	NaN	1	0	1	0	1	10.02.2015	1	0	0
153	30247	HC	HC	1	47	178	1052.3	107.3	42	NaN	1	0	2	0	1	26.02.2015	1	1	0
153	30248	HC	HC	1	47	178	1052.3	107.3	42	NaN	1	0	1	0	1	26.02.2015	1	0	0
153	30250	HC	HC	1	47	178	1052.3	107.3	42	NaN	1	0	3	0	1	26.02.2015	1	0	0
154	19765	HC	HC	1	48	182	870.9	88.8	43	NaN	1	0	2	0	1	07.05.2012	0	0	1
154	19766	HC	HC	1	48	182	870.9	88.8	43	NaN	1	0	3	0	1	07.05.2012	0	0	1
154	19767	HC	HC	1	48	182	870.9	88.8	43	NaN	1	0	1	0	1	07.05.2012	0	0	1
154	19768	HC	HC	1	48	182	865.8	88.3	43	NaN	0	0	2	0	1	07.05.2012	0	0	1
154	19769	HC	HC	1	48	182	865.8	88.3	43	NaN	0	0	3	0	1	07.05.2012	0	0	1
154	19770	HC	HC	1	48	182	865.8	88.3	43	NaN	0	0	1	0	1	07.05.2012	0	0	1
155	29840	HC	HC	1	18	180	1159.5	118.2	44	NaN	1	0	2	0	1	28.01.2015	1	1	0
155	29841	HC	HC	1	18	180	1157.9	118	44	NaN	1	0	1	0	1	28.01.2015	1	0	0
155	29842	HC	HC	1	18	180	1159.1	118.2	44	NaN	1	0	3	0	1	28.01.2015	1	0	0
156	30477	HC	HC	0	37	162	514.5	52.4	37	NaN	1	0	2	0	1	12.03.2015	1	1	0
156	30478	HC	HC	0	37	162	514.5	52.4	37	NaN	1	0	1	0	1	12.03.2015	1	0	0
156	30479	HC	HC	0	37	162	514.5	52.4	37	NaN	1	0	3	0	1	12.03.2015	1	0	0
157	40092	HC	HC	1	43	172	809.9	82.6	42	NaN	1	0	3	0	1	31.08.2017	1	0	0
157	40091	HC	HC	1	43	172	809.9	82.6	42	NaN	1	0	1	0	1	31.08.2017	1	0	0
157	40090	HC	HC	1	43	172	809.9	82.6	42	NaN	1	0	2	0	1	31.08.2017	1	1	0
158	888812537	HC	HC	1	58	175	758.2	77.3	42	NaN	1	0	1	0	1	03.08.2017	1	0	0
158	888812538	HC	HC	1	58	175	759	77.4	42	NaN	1	0	3	0	1	03.08.2017	1	0	0
158	888812536	HC	HC	1	58	175	758.2	77.3	42	NaN	1	0	2	0	1	03.08.2017	1	1	0
159	20003	HC	HC	1	43	176	728.1	74.2	42	NaN	1	0	2	0	1	21.05.2012	1	1	0
159	20004	HC	HC	1	43	176	728.1	74.2	42	NaN	1	0	3	0	1	21.05.2012	1	0	0
159	20005	HC	HC	1	43	176	728.1	74.2	42	NaN	1	0	1	0	1	21.05.2012	1	0	0
159	20006	HC	HC	1	43	176	720.3	73.4	42	NaN	0	0	2	0	1	21.05.2012	1	0	0
159	20007	HC	HC	1	43	176	720.3	73.4	42	NaN	0	0	3	0	1	21.05.2012	1	0	0
159	20008	HC	HC	1	43	176	720.3	73.4	42	NaN	0	0	1	0	1	21.05.2012	1	0	0
160	19917	HC	HC	0	46	172	659.6	67.2	39	NaN	1	0	2	0	1	14.05.2012	0	0	1
160	19918	HC	HC	0	46	172	659.6	67.2	39	NaN	1	0	3	0	1	14.05.2012	0	0	1
160	19919	HC	HC	0	46	172	659.6	67.2	39	NaN	1	0	1	0	1	14.05.2012	0	0	1
160	19920	HC	HC	0	46	172	652.5	66.5	39	NaN	0	0	2	0	1	14.05.2012	0	0	1
160	19921	HC	HC	0	46	172	652.5	66.5	39	NaN	0	0	3	0	1	14.05.2012	0	0	1
160	19922	HC	HC	0	46	172	652.5	66.5	39	NaN	0	0	1	0	1	14.05.2012	0	0	1
161	19528	HC	HC	1	21	180	737.9	75.2	44	NaN	1	0	2	0	1	24.04.2012	0	0	1
161	19529	HC	HC	1	21	180	737.6	75.2	44	NaN	1	0	3	0	1	24.04.2012	0	0	1
161	19530	HC	HC	1	21	180	737.9	75.2	44	NaN	1	0	1	0	1	24.04.2012	0	0	1
161	19531	HC	HC	1	21	180	728.8	74.3	44	NaN	0	0	2	0	1	24.04.2012	0	0	1
161	19532	HC	HC	1	21	180	728.8	74.3	44	NaN	0	0	3	0	1	24.04.2012	0	0	1
161	19533	HC	HC	1	21	180	728.8	74.3	44	NaN	0	0	1	0	1	24.04.2012	0	0	1
162	30828	HC	HC	1	66	178	1008.2	102.8	44	NaN	1	0	2	0	1	09.04.2015	1	1	0
162	30829	HC	HC	1	66	178	1009	102.9	44	NaN	1	0	3	0	1	09.04.2015	1	0	0
162	30830	HC	HC	1	66	178	1008.9	102.8	44	NaN	1	0	1	0	1	09.04.2015	1	0	0
163	29751	HC	HC	0	17	168	691	70.4	38	NaN	1	0	2	0	1	22.01.2015	1	1	0
163	29752	HC	HC	0	17	168	691	70.4	38	NaN	1	0	1	0	1	22.01.2015	1	0	0
163	29753	HC	HC	0	17	168	691	70.4	38	NaN	1	0	3	0	1	22.01.2015	1	0	0
164	19735	HC	HC	1	40	176	747.4	76.2	44	NaN	1	0	2	0	1	04.05.2012	1	1	0
164	19736	HC	HC	1	40	176	747.4	76.2	44	NaN	1	0	3	0	1	04.05.2012	1	0	0
164	19737	HC	HC	1	40	176	747.4	76.2	44	NaN	1	0	1	0	1	04.05.2012	1	0	0
164	19738	HC	HC	1	40	176	740.5	75.5	44	NaN	0	0	2	0	1	04.05.2012	1	0	0
164	19739	HC	HC	1	40	176	740.5	75.5	44	NaN	0	0	3	0	1	04.05.2012	1	0	0
164	19740	HC	HC	1	40	176	740.5	75.5	44	NaN	0	0	1	0	1	04.05.2012	1	0	0
165	19434	HC	HC	1	44	172	780.1	79.5	43	NaN	1	0	2	0	1	19.04.2012	1	1	0
165	19435	HC	HC	1	44	172	780.1	79.5	43	NaN	1	0	1	0	1	19.04.2012	1	0	0
165	19436	HC	HC	1	44	172	780.1	79.5	43	NaN	1	0	3	0	1	19.04.2012	1	0	0
165	19437	HC	HC	1	44	172	773.6	78.9	43	NaN	0	0	1	0	1	19.04.2012	1	0	0
165	19438	HC	HC	1	44	172	773.6	78.9	43	NaN	0	0	2	0	1	19.04.2012	1	0	0
165	19439	HC	HC	1	44	172	773.6	78.9	43	NaN	0	0	3	0	1	19.04.2012	1	0	0
166	30210	HC	HC	1	36	183	786.9	80.2	45	NaN	1	0	2	0	1	25.02.2015	1	1	0
166	30211	HC	HC	1	36	183	786.9	80.2	45	NaN	1	0	1	0	1	25.02.2015	1	0	0
166	30212	HC	HC	1	36	183	786.9	80.2	45	NaN	1	0	3	0	1	25.02.2015	1	0	0
167	19831	HC	HC	0	40	162	578.7	59	38	NaN	1	0	2	0	1	09.05.2012	1	1	0
167	19832	HC	HC	0	40	162	578.7	59	38	NaN	1	0	3	0	1	09.05.2012	1	0	0
167	19833	HC	HC	0	40	162	578.7	59	38	NaN	1	0	1	0	1	09.05.2012	1	0	0
167	19834	HC	HC	0	40	162	571	58.2	38	NaN	0	0	2	0	1	09.05.2012	1	0	0
167	19835	HC	HC	0	40	162	571	58.2	38	NaN	0	0	3	0	1	09.05.2012	1	0	0
167	19836	HC	HC	0	40	162	571	58.2	38	NaN	0	0	1	0	1	09.05.2012	1	0	0
168	39943	HC	HC	0	51	168	768.2	78.3	40	NaN	1	0	1	0	1	22.08.2017	1	0	0
168	39944	HC	HC	0	51	168	768.2	78.3	40	NaN	1	0	3	0	1	22.08.2017	1	0	0
168	39945	HC	HC	0	51	168	768.2	78.3	40	NaN	1	0	2	0	1	22.08.2017	1	1	0
169	19493	HC	HC	1	48	186	985.6	100.5	44	NaN	1	0	2	0	1	23.04.2012	1	1	0
169	19494	HC	HC	1	48	186	985.6	100.5	44	NaN	1	0	3	0	1	23.04.2012	1	0	0
169	19495	HC	HC	1	48	186	985.6	100.5	44	NaN	1	0	1	0	1	23.04.2012	1	0	0
169	19496	HC	HC	1	48	186	975.1	99.4	44	NaN	0	0	2	0	1	23.04.2012	1	0	0
169	19497	HC	HC	1	48	186	975.1	99.4	44	NaN	0	0	3	0	1	23.04.2012	1	0	0
169	19498	HC	HC	1	48	186	975.1	99.4	44	NaN	0	0	1	0	1	23.04.2012	1	0	0
170	19715	HC	HC	0	21	170	664.7	67.8	39	NaN	1	0	2	0	1	03.05.2012	1	1	0
170	19716	HC	HC	0	21	170	664.7	67.8	39	NaN	1	0	3	0	1	03.05.2012	1	0	0
170	19717	HC	HC	0	21	170	664.7	67.8	39	NaN	1	0	1	0	1	03.05.2012	1	0	0
170	19718	HC	HC	0	21	170	658.4	67.1	39	NaN	0	0	2	0	1	03.05.2012	1	0	0
170	19719	HC	HC	0	21	170	658.4	67.1	39	NaN	0	0	3	0	1	03.05.2012	1	0	0
170	19720	HC	HC	0	21	170	658.4	67.1	39	NaN	0	0	1	0	1	03.05.2012	1	0	0
171	30537	HC	HC	1	21	184	701.3	71.5	43	NaN	1	0	2	0	1	18.03.2015	0	0	1
171	30538	HC	HC	1	21	184	700.5	71.4	43	NaN	1	0	3	0	1	18.03.2015	0	0	1
171	30539	HC	HC	1	21	184	699.9	71.3	43	NaN	1	0	1	0	1	18.03.2015	0	0	1
172	19891	HC	HC	0	55	167	658.9	67.2	37.5	NaN	1	0	2	0	1	11.05.2012	1	1	0
172	19892	HC	HC	0	55	167	658.9	67.2	37.5	NaN	1	0	3	0	1	11.05.2012	1	0	0
172	19893	HC	HC	0	55	167	658.9	67.2	37.5	NaN	1	0	1	0	1	11.05.2012	1	0	0
172	19894	HC	HC	0	55	167	653.1	66.6	37.5	NaN	0	0	2	0	1	11.05.2012	1	0	0
172	19895	HC	HC	0	55	167	653.1	66.6	37.5	NaN	0	0	3	0	1	11.05.2012	1	0	0
172	19896	HC	HC	0	55	167	653.1	66.6	37.5	NaN	0	0	1	0	1	11.05.2012	1	0	0
173	30424	HC	HC	1	38	176	766.6	78.1	43	NaN	1	0	2	0	1	09.03.2015	0	0	1
173	30426	HC	HC	1	38	176	766.6	78.1	43	NaN	1	0	1	0	1	09.03.2015	0	0	1
173	30427	HC	HC	1	38	176	766.6	78.1	43	NaN	1	0	3	0	1	09.03.2015	0	0	1
174	29893	HC	HC	1	25	183	798.3	81.4	43	NaN	1	0	2	0	1	29.01.2015	0	0	1
174	29894	HC	HC	1	25	183	798.3	81.4	43	NaN	1	0	1	0	1	29.01.2015	0	0	1
174	29895	HC	HC	1	25	183	798.3	81.4	43	NaN	1	0	3	0	1	29.01.2015	0	0	1
175	30362	HC	HC	1	42	181	696.6	71	45	NaN	1	0	2	0	1	04.03.2015	1	1	0
175	30363	HC	HC	1	42	181	696.5	71	45	NaN	1	0	3	0	1	04.03.2015	1	0	0
175	30364	HC	HC	1	42	181	697.2	71.1	45	NaN	1	0	1	0	1	04.03.2015	1	0	0
176	30264	HC	HC	0	19	153	467.9	47.7	36	NaN	1	0	2	0	1	26.02.2015	1	1	0
176	30265	HC	HC	0	19	153	467.6	47.7	36	NaN	1	0	3	0	1	26.02.2015	1	0	0
176	30266	HC	HC	0	19	153	467.8	47.7	36	NaN	1	0	1	0	1	26.02.2015	1	0	0
177	19897	HC	HC	1	37	175	835.2	85.1	43	NaN	1	0	2	0	1	11.05.2012	1	1	0
177	19898	HC	HC	1	37	175	835.2	85.1	43	NaN	1	0	3	0	1	11.05.2012	1	0	0
177	19899	HC	HC	1	37	175	835.2	85.1	43	NaN	1	0	1	0	1	11.05.2012	1	0	0
177	19900	HC	HC	1	37	175	826.3	84.2	43	NaN	0	0	2	0	1	11.05.2012	1	0	0
177	19901	HC	HC	1	37	175	826.3	84.2	43	NaN	0	0	3	0	1	11.05.2012	1	0	0
177	19902	HC	HC	1	37	175	826.3	84.2	43	NaN	0	0	1	0	1	11.05.2012	1	0	0
178	19755	HC	HC	1	49	174	641.1	65.4	42	NaN	1	0	2	0	1	07.05.2012	1	0	0
178	19756	HC	HC	1	49	174	641.1	65.4	42	NaN	1	0	3	0	1	07.05.2012	1	0	0
178	19757	HC	HC	1	49	174	641.1	65.4	42	NaN	1	0	1	0	1	07.05.2012	1	0	0
178	19758	HC	HC	1	49	174	634.2	64.6	42	NaN	0	0	2	0	1	07.05.2012	1	0	0
178	19759	HC	HC	1	49	174	634.2	64.6	42	NaN	0	0	3	0	1	07.05.2012	1	0	0
178	19760	HC	HC	1	49	174	634.2	64.6	42	NaN	0	0	1	0	1	07.05.2012	1	0	0
179	30012	HC	HC	1	18	176	717.9	73.2	43	NaN	1	0	2	0	1	10.02.2015	0	0	1
179	30013	HC	HC	1	18	176	718.7	73.3	43	NaN	1	0	3	0	1	10.02.2015	0	0	1
179	30014	HC	HC	1	18	176	718.8	73.3	43	NaN	1	0	1	0	1	10.02.2015	0	0	1
180	42970	HC	HC	1	22	177	819.1	83.5	43	NaN	1	0	1	0	1	24.05.2018	0	0	1
180	42971	HC	HC	1	22	177	819.1	83.5	43	NaN	1	0	3	0	1	24.05.2018	0	0	1
180	42969	HC	HC	1	22	177	819.1	83.5	43	NaN	1	0	2	0	1	24.05.2018	0	0	1
181	42973	HC	HC	0	40	152	567.2	57.8	37	NaN	1	0	1	0	1	24.05.2018	1	0	0
181	42974	HC	HC	0	40	152	567.2	57.8	37	NaN	1	0	3	0	1	24.05.2018	1	0	0
181	42972	HC	HC	0	40	152	567.2	57.8	37	NaN	1	0	2	0	1	24.05.2018	1	1	0
182	42976	HC	HC	0	27	164	554.5	56.5	39	NaN	1	0	1	0	1	24.05.2018	1	0	0
182	42977	HC	HC	0	27	164	554.5	56.5	39	NaN	1	0	3	0	1	24.05.2018	1	0	0
182	42975	HC	HC	0	27	164	554.5	56.5	39	NaN	1	0	2	0	1	24.05.2018	1	1	0
183	42985	HC	HC	0	28	167	516.6	52.7	38	NaN	1	0	1	0	1	24.05.2018	1	0	0
183	42986	HC	HC	0	28	167	516.6	52.7	38	NaN	1	0	3	0	1	24.05.2018	1	0	0
183	42984	HC	HC	0	28	167	516.6	52.7	38	NaN	1	0	2	0	1	24.05.2018	1	1	0
184	43000	HC	HC	0	26	154	616.4	62.8	36	NaN	1	0	1	0	1	25.05.2018	0	0	1
184	43001	HC	HC	0	26	154	616.4	62.8	36	NaN	1	0	3	0	1	25.05.2018	0	0	1
184	42999	HC	HC	0	26	154	616.4	62.8	36	NaN	1	0	2	0	1	25.05.2018	0	0	1
185	43028	HC	HC	0	45	174	661.4	67.4	41	NaN	1	0	1	0	1	29.05.2018	1	0	0
185	43029	HC	HC	0	45	174	661.4	67.4	41	NaN	1	0	3	0	1	29.05.2018	1	0	0
185	43027	HC	HC	0	45	174	661.4	67.4	41	NaN	1	0	2	0	1	29.05.2018	1	1	0
186	43031	HC	HC	0	25	178	691.3	70.5	40	NaN	1	0	1	0	1	29.05.2018	1	0	0
186	43032	HC	HC	0	25	178	691.3	70.5	40	NaN	1	0	3	0	1	29.05.2018	1	0	0
186	43030	HC	HC	0	25	178	691.3	70.5	40	NaN	1	0	2	0	1	29.05.2018	1	1	0
187	43036	HC	HC	0	55	173	929.5	94.8	41	NaN	1	0	1	0	1	29.05.2018	1	0	0
187	43037	HC	HC	0	55	173	929.5	94.8	41	NaN	1	0	3	0	1	29.05.2018	1	0	0
187	43035	HC	HC	0	55	173	929.5	94.8	41	NaN	1	0	2	0	1	29.05.2018	1	1	0
188	43039	HC	HC	0	40	172	883	90	41	NaN	1	0	1	0	1	29.05.2018	0	0	1
188	43040	HC	HC	0	40	172	883	90	41	NaN	1	0	3	0	1	29.05.2018	0	0	1
188	43038	HC	HC	0	40	172	883	90	41	NaN	1	0	2	0	1	29.05.2018	0	0	1
189	43054	HC	HC	0	49	172	617.4	62.9	39	NaN	1	0	1	0	1	30.05.2018	0	0	1
189	43055	HC	HC	0	49	172	617.4	62.9	39	NaN	1	0	3	0	1	30.05.2018	0	0	1
189	43053	HC	HC	0	49	172	617.4	62.9	39	NaN	1	0	2	0	1	30.05.2018	0	0	1
190	43057	HC	HC	0	27	170	618.1	63	39	NaN	1	0	1	0	1	30.05.2018	1	0	0
190	43058	HC	HC	0	27	170	618.1	63	39	NaN	1	0	3	0	1	30.05.2018	1	0	0
190	43056	HC	HC	0	27	170	618.1	63	39	NaN	1	0	2	0	1	30.05.2018	1	1	0
191	43060	HC	HC	1	25	184	778.3	79.3	43	NaN	1	0	1	0	1	30.05.2018	1	0	0
191	43061	HC	HC	1	25	184	778.3	79.3	43	NaN	1	0	3	0	1	30.05.2018	1	0	0
191	43059	HC	HC	1	25	184	778.3	79.3	43	NaN	1	0	2	0	1	30.05.2018	1	1	0
192	43078	HC	HC	1	78	173	677.6	69.1	43	NaN	1	0	1	0	1	01.06.2018	1	0	0
192	43077	HC	HC	1	78	173	677.6	69.1	43	NaN	1	0	3	0	1	01.06.2018	1	0	0
192	43076	HC	HC	1	78	173	679	69.2	43	NaN	1	0	2	0	1	01.06.2018	1	1	0
193	43094	HC	HC	0	54	159	542.2	55.3	37	NaN	1	0	1	0	1	05.06.2018	1	0	0
193	43095	HC	HC	0	54	159	542.4	55.3	37	NaN	1	0	3	0	1	05.06.2018	1	0	0
193	43093	HC	HC	0	54	159	542.4	55.3	37	NaN	1	0	2	0	1	05.06.2018	1	1	0
194	43097	HC	HC	0	51	160	529.4	54	37	NaN	1	0	1	0	1	05.06.2018	1	0	0
194	43098	HC	HC	0	51	160	529.4	54	37	NaN	1	0	3	0	1	05.06.2018	1	0	0
194	43096	HC	HC	0	51	160	529.4	54	37	NaN	1	0	2	0	1	05.06.2018	1	1	0
195	43110	HC	HC	1	43	174	679.1	69.2	44	NaN	1	0	1	0	1	05.06.2018	1	0	0
195	43111	HC	HC	1	43	174	679.1	69.2	44	NaN	1	0	3	0	1	05.06.2018	1	0	0
195	43109	HC	HC	1	43	174	679.1	69.2	44	NaN	1	0	2	0	1	05.06.2018	1	1	0
196	43116	HC	HC	0	25	162	658.9	67.2	38	NaN	1	0	1	0	1	05.06.2018	0	0	1
196	43117	HC	HC	0	25	162	658.9	67.2	38	NaN	1	0	3	0	1	05.06.2018	0	0	1
196	43115	HC	HC	0	25	162	658.9	67.2	38	NaN	1	0	2	0	1	05.06.2018	0	0	1
197	43135	HC	HC	0	47	167	647.8	66	38	NaN	1	0	1	0	1	06.06.2018	1	0	0
197	43136	HC	HC	0	47	167	647.8	66	38	NaN	1	0	3	0	1	06.06.2018	1	0	0
197	43134	HC	HC	0	47	167	647.8	66	38	NaN	1	0	2	0	1	06.06.2018	1	1	0
198	43152	HC	HC	1	31	175	689.6	70.3	44	NaN	1	0	1	0	1	07.06.2018	0	0	1
198	43153	HC	HC	1	31	175	689.6	70.3	44	NaN	1	0	3	0	1	07.06.2018	0	0	1
198	43151	HC	HC	1	31	175	689.4	70.3	44	NaN	1	0	2	0	1	07.06.2018	0	0	1
199	43226	HC	HC	0	27	170	652.6	66.5	40	NaN	1	0	1	0	1	14.06.2018	0	0	1
199	43227	HC	HC	0	27	170	652.6	66.5	40	NaN	1	0	3	0	1	14.06.2018	0	0	1
199	43225	HC	HC	0	27	170	652.6	66.5	40	NaN	1	0	2	0	1	14.06.2018	0	0	1
200	43241	HC	HC	1	25	187	856.6	87.3	44	NaN	1	0	1	0	1	15.06.2018	1	0	0
200	43242	HC	HC	1	25	187	856.6	87.3	44	NaN	1	0	3	0	1	15.06.2018	1	0	0
200	43240	HC	HC	1	25	187	856.6	87.3	44	NaN	1	0	2	0	1	15.06.2018	1	1	0
201	43245	HC	HC	1	24	179	739.9	75.4	43	NaN	1	0	3	0	1	15.06.2018	0	0	1
201	43244	HC	HC	1	24	179	739.9	75.4	43	NaN	1	0	1	0	1	15.06.2018	0	0	1
201	43243	HC	HC	1	24	179	739.9	75.4	43	NaN	1	0	2	0	1	15.06.2018	0	0	1
202	43305	HC	HC	1	38	185	888.5	90.6	43	NaN	1	0	1	0	1	21.06.2018	1	0	0
202	43304	HC	HC	1	38	185	888.5	90.6	43	NaN	1	0	3	0	1	21.06.2018	1	0	0
202	43303	HC	HC	1	38	185	888.5	90.6	43	NaN	1	0	2	0	1	21.06.2018	1	1	0
203	43325	HC	HC	1	25	185	928.3	94.6	45	NaN	1	0	1	0	1	22.06.2018	1	0	0
203	43323	HC	HC	1	25	185	928.3	94.6	45	NaN	1	0	3	0	1	22.06.2018	1	0	0
203	43324	HC	HC	1	25	185	928.3	94.6	45	NaN	1	0	2	0	1	22.06.2018	1	1	0
204	29748	HC	HC	0	16	163	563.1	57.4	38	NaN	1	0	2	0	1	22.01.2015	0	0	1
204	29749	HC	HC	0	16	163	563	57.4	38	NaN	1	0	1	0	1	22.01.2015	0	0	1
204	29750	HC	HC	0	16	163	563	57.4	38	NaN	1	0	3	0	1	22.01.2015	0	0	1
205	29869	HC	HC	1	17	163	607.5	61.9	42	NaN	1	0	2	0	1	29.01.2015	1	1	0
205	29870	HC	HC	1	17	163	608.8	62.1	42	NaN	1	0	1	0	1	29.01.2015	1	0	0
205	29872	HC	HC	1	17	163	607.4	61.9	42	NaN	1	0	3	0	1	29.01.2015	1	0	0
206	19789	HC	HC	1	51	176	792.2	80.8	42	NaN	1	0	2	0	1	08.05.2012	0	0	1
206	19790	HC	HC	1	51	176	792.2	80.8	42	NaN	1	0	3	0	1	08.05.2012	0	0	1
206	19791	HC	HC	1	51	176	792.2	80.8	42	NaN	1	0	1	0	1	08.05.2012	0	0	1
206	19792	HC	HC	1	51	176	783	79.8	42	NaN	0	0	2	0	1	08.05.2012	0	0	1
206	19793	HC	HC	1	51	176	783	79.8	42	NaN	0	0	3	0	1	08.05.2012	0	0	1
206	19794	HC	HC	1	51	176	783	79.8	42	NaN	0	0	1	0	1	08.05.2012	0	0	1
207	19501	HC	HC	0	39	160	710.5	72.4	38	NaN	1	0	2	0	1	23.04.2012	0	0	1
207	19502	HC	HC	0	39	160	710.5	72.4	38	NaN	1	0	3	0	1	23.04.2012	0	0	1
207	19503	HC	HC	0	39	160	710.5	72.4	38	NaN	1	0	1	0	1	23.04.2012	0	0	1
207	19504	HC	HC	0	39	160	705.2	71.9	38	NaN	0	0	2	0	1	23.04.2012	0	0	1
207	19505	HC	HC	0	39	160	705.2	71.9	38	NaN	0	0	3	0	1	23.04.2012	0	0	1
207	19506	HC	HC	0	39	160	705.2	71.9	38	NaN	0	0	1	0	1	23.04.2012	0	0	1
208	19522	HC	HC	1	23	172	683.2	69.6	41	NaN	1	0	2	0	1	24.04.2012	1	1	0
208	19523	HC	HC	1	23	172	683.2	69.6	41	NaN	1	0	3	0	1	24.04.2012	1	0	0
208	19524	HC	HC	1	23	172	683.2	69.6	41	NaN	1	0	1	0	1	24.04.2012	1	0	0
208	19525	HC	HC	1	23	172	676.2	68.9	41	NaN	0	0	2	0	1	24.04.2012	1	0	0
208	19526	HC	HC	1	23	172	676.2	68.9	41	NaN	0	0	3	0	1	24.04.2012	1	0	0
208	19527	HC	HC	1	23	172	676.2	68.9	41	NaN	0	0	1	0	1	24.04.2012	1	0	0
209	19507	HC	HC	0	24	168	588.4	60	38	NaN	1	0	2	0	1	23.04.2012	1	1	0
209	19508	HC	HC	0	24	168	588.4	60	38	NaN	1	0	3	0	1	23.04.2012	1	0	0
209	19509	HC	HC	0	24	168	588.4	60	38	NaN	1	0	1	0	1	23.04.2012	1	0	0
209	19510	HC	HC	0	24	168	582.4	59.4	38	NaN	0	0	2	0	1	23.04.2012	1	0	0
209	19511	HC	HC	0	24	168	582.4	59.4	38	NaN	0	0	3	0	1	23.04.2012	1	0	0
209	19512	HC	HC	0	24	168	582.4	59.4	38	NaN	0	0	1	0	1	23.04.2012	1	0	0
210	30206	HC	HC	0	23	169	565.1	57.6	39	NaN	1	0	2	0	1	24.02.2015	0	0	1
210	30207	HC	HC	0	23	169	565.1	57.6	39	NaN	1	0	1	0	1	24.02.2015	0	0	1
210	30208	HC	HC	0	23	169	565.1	57.6	39	NaN	1	0	3	0	1	24.02.2015	0	0	1
211	39961	HC	HC	0	51	155	629.7	64.2	37	NaN	1	0	1	0	1	22.08.2017	1	0	0
211	39960	HC	HC	0	51	155	629.7	64.2	37	NaN	1	0	3	0	1	22.08.2017	1	0	0
211	39959	HC	HC	0	51	155	629.7	64.2	37	NaN	1	0	2	0	1	22.08.2017	1	1	0
212	22543	C	C_F	1	41	NaN	888.5	90.6	NaN	1	1	0	2	0	1	25.01.2013	1	1	0
212	22621	C	C_F	1	41	NaN	888.6	90.6	NaN	1	1	0	2	0	2	01.02.2013	1	0	0
212	22765	C	C_F	1	41	NaN	877.8	89.5	NaN	1	1	0	2	0	2	14.02.2013	1	0	0
212	22838	C	C_F	1	41	NaN	886.5	90.4	NaN	1	1	0	2	0	2	21.02.2013	1	0	0
213	26016	C	C_F	1	46	168	757.2	77.2	41	2	1	1	2	0	2	28.01.2014	1	0	0
213	26017	C	C_F	1	46	168	757.7	77.2	41	2	1	0	2	0	2	28.01.2014	1	0	0
213	26093	C	C_F	1	46	168	744.8	75.9	41	2	1	1	2	0	2	04.02.2014	1	0	0
213	26160	C	C_F	1	46	168	750.3	76.5	41	2	1	1	2	0	2	11.02.2014	1	0	0
213	26234	C	C_F	1	47	168	750.1	76.5	41	2	1	1	2	0	2	18.02.2014	1	0	0
213	26300	C	C_F	1	47	168	750.6	76.5	41	2	1	1	2	0	2	25.02.2014	1	0	0
214	41401	C	C_F	1	56	178	798.2	81.4	43	1	1	0	2	0	1	04.01.2018	1	1	0
214	41464	C	C_F	1	56	178	807.8	82.3	43	1	1	0	2	0	2	11.01.2018	1	0	0
214	41522	C	C_F	1	56	178	799.9	81.5	43	1	1	1	2	0	2	18.01.2018	1	0	0
214	41523	C	C_F	1	56	178	758.3	77.3	43	1	1	0	2	0	2	18.01.2018	1	0	0
214	41613	C	C_F	1	56	178	805.2	82.1	43	1	1	1	2	0	2	29.01.2018	1	0	0
214	41716	C	C_F	1	56	178	815.1	83.1	43	1	1	1	2	0	2	06.02.2018	1	0	0
214	41872	C	C_F	1	56	178	808	82.4	43	1	1	1	2	0	2	20.02.2018	1	0	0
214	41936	C	C_F	1	56	178	792.8	80.8	43	1	1	1	2	0	2	27.02.2018	1	0	0
215	18373	C	C_F	1	56	NaN	865.6	88.2	NaN	1	1	0	2	0	1	03.01.2012	1	1	0
215	18457	C	C_F	1	56	NaN	864.9	88.2	NaN	1	1	0	2	0	2	13.01.2012	1	0	0
215	18458	C	C_F	1	56	NaN	867.7	88.5	NaN	1	1	1	2	0	2	13.01.2012	1	0	0
215	18587	C	C_F	1	56	NaN	880.1	89.7	NaN	1	1	1	2	0	2	27.01.2012	1	0	0
216	22338	C	C_F	1	43	165	782.9	79.8	43	0	1	0	2	0	1	09.01.2013	0	0	1
216	22659	C	C_F	1	43	165	766	78.1	43	0	1	0	2	0	2	06.02.2013	0	0	1
216	22737	C	C_F	1	43	165	772.1	78.7	43	0	2	0	2	0	2	13.02.2013	0	0	1
216	22808	C	C_F	1	43	165	779.4	79.4	43	0	2	0	2	0	2	20.02.2013	0	0	1
216	22895	C	C_F	1	43	165	773	78.8	43	0	1	0	2	0	2	27.02.2013	0	0	1
217	11987	C	C_F	1	45	178	647	66	41	1	1	NaN	2	0	1	14.01.2010	1	0	0
217	12045	C	C_F	1	45	178	657.4	67	41	1	1	NaN	2	0	2	21.01.2010	1	0	0
217	12102	C	C_F	1	45	178	665.6	67.8	41	1	1	NaN	2	0	2	28.01.2010	1	0	0
217	28553	C	C_F	1	50	178	599.4	61.1	41	1	1	NaN	2	1	3	23.09.2014	1	0	0
217	28668	C	C_F	1	50	178	597	60.9	41	1	1	NaN	2	1	2	01.10.2014	1	0	0
217	28717	C	C_F	1	50	178	596.5	60.8	41	1	1	1	2	1	2	06.10.2014	1	0	0
217	28718	C	C_F	1	50	178	596.5	60.8	41	1	1	0	2	1	2	06.10.2014	1	0	0
217	28837	C	C_F	1	50	178	602	61.4	41	1	1	1	2	1	2	16.10.2014	1	0	0
217	28872	C	C_F	1	50	178	610.1	62.2	41	1	1	1	2	1	2	20.10.2014	1	0	0
218	22437	C	C_F	1	35	175	796.1	81.2	42	0	1	0	2	0	1	16.01.2013	0	0	1
218	22662	C	C_F	1	35	175	779.1	79.4	42	0	1	0	2	0	2	06.02.2013	0	0	1
218	22739	C	C_F	1	35	175	785.2	80	42	0	1	0	2	0	2	13.02.2013	0	0	1
219	18686	C	C_F	1	60	NaN	817.9	83.4	NaN	0	1	NaN	2	0	2	08.02.2012	1	0	0
219	18756	C	C_F	1	60	NaN	820.6	83.6	NaN	0	1	NaN	2	0	2	15.02.2012	1	0	0
219	18817	C	C_F	1	60	NaN	823.8	84	NaN	0	1	NaN	2	0	2	22.02.2012	1	0	0
220	22595	C	C_F	1	52	180	755.9	77.1	43	1	1	0	2	0	1	31.01.2013	1	1	0
220	22682	C	C_F	1	52	180	745.2	76	43	1	1	0	2	0	2	07.02.2013	1	0	0
220	22851	C	C_F	1	52	180	742.2	75.7	43	1	1	0	2	0	2	22.02.2013	1	0	0
220	22926	C	C_F	1	52	180	735.2	74.9	43	1	1	1	2	0	2	01.03.2013	1	0	0
220	22927	C	C_F	1	52	180	733.5	74.8	43	1	1	0	2	0	2	01.03.2013	1	0	0
221	22772	C	C_F	1	40	176	801	81.7	43	2	1	1	2	0	1	15.02.2013	1	0	0
221	22925	C	C_F	1	40	176	787.4	80.3	43	2	1	1	2	0	2	01.03.2013	1	0	0
222	22525	C	C_F	1	52	172	899.2	91.7	44	0	1	0	2	0	2	24.01.2013	1	0	0
222	22623	C	C_F	1	52	172	905.1	92.3	44	0	1	1	2	0	2	01.02.2013	1	0	0
222	22624	C	C_F	1	52	172	903.2	92.1	44	0	1	0	2	0	2	01.02.2013	1	0	0
222	22700	C	C_F	1	52	172	899.4	91.7	44	0	1	1	2	0	2	08.02.2013	1	0	0
222	22784	C	C_F	1	52	172	893.3	91.1	44	0	1	1	2	0	2	15.02.2013	1	0	0
222	22864	C	C_F	1	52	172	886	90.3	44	0	1	1	2	0	2	22.02.2013	1	0	0
223	29675	C	C_F	1	40	176	772	78.7	41	1	1	0	2	0	1	15.01.2015	0	0	1
223	29769	C	C_F	1	40	176	771.7	78.7	41	1	1	0	2	0	2	23.01.2015	0	0	1
223	29849	C	C_F	1	40	176	776.9	79.2	41	1	1	0	2	0	2	29.01.2015	0	0	1
223	30068	C	C_F	1	40	176	776	79.1	41	1	1	0	2	0	2	12.02.2015	0	0	1
224	22429	C	C_F	1	53	176	983.7	100.3	44	0	1	0	2	0	1	16.01.2013	1	1	0
224	22587	C	C_F	1	53	176	980.8	100	44	0	1	0	2	0	2	30.01.2013	1	0	0
224	22669	C	C_F	1	53	176	978.2	99.7	44	0	1	0	2	0	2	06.02.2013	1	0	0
224	22748	C	C_F	1	53	176	982.2	100.1	44	0	1	0	2	0	2	13.02.2013	1	0	0
224	25607	C	C_F	1	54	176	977.3	99.6	44	0	1	0	2	1	3	04.12.2013	1	0	0
224	25679	C	C_F	1	54	176	984.4	100.3	44	0	1	0	2	1	2	11.12.2013	1	0	0
225	22578	C	C_F	1	42	NaN	947.5	96.6	NaN	0	1	1	2	0	2	29.01.2013	1	0	0
225	22579	C	C_F	1	42	NaN	946.7	96.5	NaN	0	1	0	2	0	2	29.01.2013	1	0	0
226	25974	C	C_F	1	45	180	1165.1	118.8	45	1	1	0	2	0	1	23.01.2014	1	1	0
226	26063	C	C_F	1	45	180	1175	119.8	45	1	1	1	2	0	2	30.01.2014	1	0	0
226	26064	C	C_F	1	45	180	1173.4	119.6	45	1	1	0	2	0	2	30.01.2014	1	0	0
226	26125	C	C_F	1	45	180	1173.6	119.6	45	1	1	1	2	0	2	06.02.2014	1	0	0
226	26199	C	C_F	1	45	180	1181.5	120.4	45	1	1	1	2	0	2	13.02.2014	1	0	0
227	22548	C	C_F	0	42	168	587.4	59.9	37	0	1	0	2	0	1	28.01.2013	1	1	0
227	22632	C	C_F	0	42	168	598.3	61	37	0	1	0	2	0	2	04.02.2013	1	0	0
227	22706	C	C_F	0	42	168	589.2	60.1	37	0	1	0	2	0	2	11.02.2013	1	0	0
228	8692	C	C_F	1	63	NaN	654	66.7	NaN	2	0	0	2	0	1	12.02.2009	1	0	0
228	8753	C	C_F	1	63	NaN	663.9	67.7	NaN	2	1	NaN	2	0	2	19.02.2009	1	0	0
228	8829	C	C_F	1	63	NaN	664.8	67.8	NaN	2	1	1	2	0	2	26.02.2009	1	0	0
228	8830	C	C_F	1	63	NaN	663.2	67.6	NaN	2	1	0	2	0	2	26.02.2009	1	0	0
228	8910	C	C_F	1	63	NaN	657.4	67	NaN	2	1	1	2	0	2	05.03.2009	1	0	0
229	12111	C	C_F	0	37	NaN	713.6	72.7	NaN	0	2	0	2	0	1	29.01.2010	1	0	0
229	12183	C	C_F	0	37	NaN	708.7	72.2	NaN	0	1	0	2	0	2	05.02.2010	1	0	0
229	12284	C	C_F	0	37	NaN	709.8	72.4	NaN	0	2	0	2	0	2	16.02.2010	1	0	0
230	18547	C	C_F	1	21	180	711.6	72.5	45	0	1	0	2	0	1	24.01.2012	1	1	0
230	18612	C	C_F	1	21	180	726.4	74	45	0	1	0	2	0	2	31.01.2012	1	0	0
230	18676	C	C_F	1	21	180	743.6	75.8	45	0	1	0	2	0	2	07.02.2012	1	0	0
230	18739	C	C_F	1	21	180	745.2	76	45	0	1	0	2	0	2	14.02.2012	1	0	0
230	19329	C	C_F	1	21	180	752.2	76.7	45	0	1	0	2	1	3	12.04.2012	1	0	0
230	19432	C	C_F	1	21	180	743	75.7	45	0	0	0	2	1	2	19.04.2012	1	0	0
230	19632	C	C_F	1	21	180	735.1	74.9	45	0	1	0	2	1	2	27.04.2012	1	0	0
231	26074	C	C_F	1	48	186	908.4	92.6	44	0	1	0	2	0	2	31.01.2014	1	0	0
231	26130	C	C_F	1	48	186	901	91.8	44	0	1	NaN	2	0	2	07.02.2014	1	0	0
231	26205	C	C_F	1	48	186	903.5	92.1	44	0	1	NaN	2	0	2	14.02.2014	1	0	0
231	26268	C	C_F	1	48	186	897.6	91.5	44	0	1	NaN	2	0	2	21.02.2014	1	0	0
231	26359	C	C_F	1	48	186	898.7	91.6	44	0	1	NaN	2	0	2	28.02.2014	1	0	0
232	22672	C	C_F	1	43	NaN	995.1	101.4	NaN	2	1	1	2	0	1	06.02.2013	1	0	0
232	22673	C	C_F	1	43	NaN	994.2	101.3	NaN	2	1	0	2	0	1	06.02.2013	1	1	0
232	22754	C	C_F	1	43	NaN	977.4	99.6	NaN	2	1	NaN	2	0	2	13.02.2013	1	0	0
232	22823	C	C_F	1	43	NaN	980.7	100	NaN	2	1	NaN	2	0	2	20.02.2013	1	0	0
232	22906	C	C_F	1	43	NaN	984.7	100.4	NaN	2	1	NaN	2	0	2	27.02.2013	1	0	0
232	22976	C	C_F	1	43	NaN	989.5	100.9	NaN	2	1	NaN	2	0	2	06.03.2013	1	0	0
232	23050	C	C_F	1	43	NaN	993.2	101.2	NaN	2	1	NaN	2	0	2	13.03.2013	1	0	0
232	23117	C	C_F	1	43	NaN	997.6	101.7	NaN	2	1	NaN	2	0	2	20.03.2013	1	0	0
233	26055	C	C_F	0	41	170	668.9	68.2	41	0	1	0	2	0	1	30.01.2014	1	1	0
233	26056	C	C_F	0	41	170	668.3	68.1	41	0	1	1	2	0	1	30.01.2014	1	0	0
233	26119	C	C_F	0	41	170	657.5	67	41	0	1	NaN	2	0	2	06.02.2014	1	0	0
233	26197	C	C_F	0	41	170	656.4	66.9	41	0	1	NaN	2	0	2	13.02.2014	1	0	0
233	26262	C	C_F	0	41	170	652.9	66.6	41	0	1	NaN	2	0	2	20.02.2014	1	0	0
234	4561	C	C_F	0	23	NaN	540.4	55.1	NaN	1	0	0	2	0	1	22.01.2008	1	0	0
234	4642	C	C_F	0	23	NaN	528.8	53.9	NaN	1	0	0	2	0	2	29.01.2008	1	0	0
234	4724	C	C_F	0	23	NaN	539.8	55	NaN	1	0	0	2	0	2	05.02.2008	1	0	0
234	4797	C	C_F	0	23	NaN	558.1	56.9	NaN	1	1	0	2	0	2	12.02.2008	1	0	0
234	4884	C	C_F	0	23	NaN	564.2	57.5	NaN	1	1	NaN	2	0	2	19.02.2008	1	0	0
234	4967	C	C_F	0	23	NaN	570.9	58.2	NaN	1	1	NaN	2	0	2	26.02.2008	1	0	0
235	22572	C	C_F	1	60	174	872.2	88.9	43	1	1	0	2	0	1	29.01.2013	0	0	1
235	22663	C	C_F	1	60	174	872	88.9	43	1	1	0	2	0	2	06.02.2013	0	0	1
235	22751	C	C_F	1	60	174	867.5	88.4	43	1	1	0	2	0	2	13.02.2013	0	0	1
235	22752	C	C_F	1	60	174	870.2	88.7	43	1	1	1	2	0	2	13.02.2013	0	0	1
235	22824	C	C_F	1	60	174	860.5	87.7	43	1	1	1	2	0	2	20.02.2013	0	0	1
235	22867	C	C_F	1	60	174	855.9	87.2	43	1	1	1	2	0	2	25.02.2013	0	0	1
235	22974	C	C_F	1	60	174	852.6	86.9	43	1	1	1	2	0	2	06.03.2013	0	0	1
235	26091	C	C_F	1	61	174	900.4	91.8	43	1	1	NaN	2	1	3	04.02.2014	0	0	1
235	26158	C	C_F	1	61	174	903.3	92.1	43	1	1	NaN	2	1	2	11.02.2014	0	0	1
235	26231	C	C_F	1	61	174	901.5	91.9	43	1	1	NaN	2	1	2	18.02.2014	0	0	1
235	26298	C	C_F	1	61	174	898.5	91.6	43	1	1	NaN	2	1	2	25.02.2014	0	0	1
235	26381	C	C_F	1	61	174	910.7	92.8	43	1	1	NaN	2	1	2	04.03.2014	0	0	1
236	30005	C	C_F	1	53	180	909.1	92.7	43	1	1	1	2	0	1	10.02.2015	1	0	0
236	30143	C	C_F	1	53	180	894	91.1	43	1	1	1	2	0	2	20.02.2015	1	0	0
236	30290	C	C_F	1	53	180	885.3	90.2	43	1	1	1	2	0	2	27.02.2015	1	0	0
236	30323	C	C_F	1	53	180	889.6	90.7	43	1	1	1	2	0	2	03.03.2015	1	0	0
237	18579	C	C_F	1	52	NaN	764.4	77.9	NaN	0	2	0	2	0	1	26.01.2012	1	0	0
237	18645	C	C_F	1	52	NaN	750.4	76.5	NaN	0	2	0	2	0	2	02.02.2012	1	0	0
237	18704	C	C_F	1	52	NaN	748.1	76.3	NaN	0	2	0	2	0	2	09.02.2012	1	0	0
238	4859	C	C_F	1	54	NaN	788.7	80.4	NaN	2	1	0	2	0	1	15.02.2008	0	0	1
238	4943	C	C_F	1	54	NaN	785.3	80.1	NaN	2	1	0	2	0	2	22.02.2008	0	0	1
238	5028	C	C_F	1	54	NaN	788.5	80.4	NaN	2	1	0	2	0	2	29.02.2008	0	0	1
239	8639	C	C_F	0	40	NaN	650.8	66.3	NaN	1	0	0	2	0	1	06.02.2009	1	0	0
239	8709	C	C_F	0	40	NaN	661.2	67.4	NaN	1	1	0	2	0	2	13.02.2009	1	0	0
239	8781	C	C_F	0	40	NaN	661	67.4	NaN	1	1	0	2	0	2	20.02.2009	1	0	0
239	8862	C	C_F	0	40	NaN	664.4	67.7	NaN	1	1	0	2	0	2	27.02.2009	1	0	0
240	821	C	C_F	1	37	NaN	895.6	91.3	NaN	0	1	1	2	0	1	22.02.2007	1	0	0
240	944	C	C_F	1	37	NaN	896.1	91.3	NaN	0	1	1	2	0	2	01.03.2007	1	0	0
241	26027	C	C_F	1	54	178	931.7	95	45	0	0	0	2	0	1	28.01.2014	1	0	0
241	26098	C	C_F	1	54	178	946	96.4	45	0	1	0	2	0	2	04.02.2014	1	0	0
241	26170	C	C_F	1	54	178	958.7	97.7	45	0	1	0	2	0	2	11.02.2014	1	0	0
241	26240	C	C_F	1	54	178	952.6	97.1	45	0	1	0	2	0	2	18.02.2014	1	0	0
241	26308	C	C_F	1	54	178	940.9	95.9	45	0	1	0	2	0	2	25.02.2014	1	0	0
242	9206	C	C_F	1	32	NaN	702.2	71.6	NaN	2	2	0	2	0	1	03.04.2009	1	0	0
242	9287	C	C_F	1	32	NaN	695.7	70.9	NaN	2	2	0	2	0	2	10.04.2009	1	0	0
242	9414	C	C_F	1	32	NaN	685.4	69.9	NaN	2	1	NaN	2	0	2	24.04.2009	1	0	0
243	12161	C	C_F	1	30	NaN	664.6	67.7	NaN	0	1	0	2	0	1	03.02.2010	1	1	0
243	12222	C	C_F	1	30	NaN	659.5	67.2	NaN	0	1	0	2	0	2	10.02.2010	1	0	0
243	12310	C	C_F	1	30	NaN	656.5	66.9	NaN	0	1	0	2	0	2	18.02.2010	1	0	0
243	12394	C	C_F	1	30	NaN	678.3	69.1	NaN	0	1	0	2	0	2	25.02.2010	1	0	0
243	12496	C	C_F	1	30	NaN	664.9	67.8	NaN	0	1	0	2	0	2	04.03.2010	1	0	0
243	12584	C	C_F	1	30	NaN	674.3	68.7	NaN	0	1	0	2	0	2	12.03.2010	1	0	0
244	22610	C	C_F	1	43	192	1039.7	106	45	0	1	0	2	0	1	01.02.2013	0	0	1
244	22728	C	C_F	1	43	192	1047	106.7	45	0	1	0	2	0	2	12.02.2013	0	0	1
244	22800	C	C_F	1	43	192	1058.5	107.9	45	0	1	1	2	0	2	19.02.2013	0	0	1
244	22801	C	C_F	1	43	192	1055.8	107.6	45	0	1	0	2	0	2	19.02.2013	0	0	1
244	22898	C	C_F	1	43	192	1058.2	107.9	45	0	1	1	2	0	2	27.02.2013	0	0	1
244	22969	C	C_F	1	43	192	1067.6	108.8	45	0	1	1	2	0	2	06.03.2013	0	0	1
245	12588	C	C_F	1	44	NaN	938.9	95.7	NaN	1	1	1	2	0	2	12.03.2010	1	0	0
246	22759	C	C_F	1	60	NaN	1007.8	102.7	NaN	0	1	0	2	0	2	14.02.2013	1	0	0
246	22830	C	C_F	1	60	NaN	1005.2	102.5	NaN	0	1	0	2	0	2	21.02.2013	1	0	0
246	22916	C	C_F	1	60	NaN	1001.7	102.1	NaN	0	1	0	2	0	2	28.02.2013	1	0	0
247	15617	C	C_F	1	41	NaN	694.5	70.8	NaN	0	1	NaN	2	0	1	02.02.2011	1	0	0
247	15709	C	C_F	1	41	NaN	702	71.6	NaN	0	1	NaN	2	0	2	10.02.2011	1	0	0
247	15767	C	C_F	1	41	NaN	706.5	72	NaN	0	1	0	2	0	2	17.02.2011	1	0	0
247	15868	C	C_F	1	41	NaN	723.5	73.8	NaN	0	1	NaN	2	0	2	02.03.2011	1	0	0
248	33759	C	C_F	1	41	180	858.8	87.5	43	0	1	0	2	0	1	03.02.2016	0	0	1
248	33859	C	C_F	1	41	180	858.6	87.5	43	0	1	1	2	0	2	12.02.2016	0	0	1
248	33860	C	C_F	1	41	180	857.1	87.4	43	0	1	0	2	0	2	12.02.2016	0	0	1
248	33908	C	C_F	1	41	180	865.7	88.2	43	0	1	1	2	0	2	17.02.2016	0	0	1
248	33975	C	C_F	1	42	180	866.6	88.3	43	0	1	1	2	0	2	23.02.2016	0	0	1
248	34059	C	C_F	1	42	180	863.9	88.1	43	0	1	1	2	0	2	01.03.2016	0	0	1
249	41640	C	C_F	1	35	180	680.2	69.3	44	0	1	0	2	0	1	30.01.2018	1	1	0
249	41701	C	C_F	1	35	180	660.7	67.3	44	0	1	0	2	0	2	05.02.2018	1	0	0
249	41811	C	C_F	1	35	180	667	68	44	0	1	0	2	0	2	14.02.2018	1	0	0
249	41873	C	C_F	1	35	180	671.8	68.5	44	0	1	0	2	0	2	20.02.2018	1	0	0
249	41874	C	C_F	1	35	180	672.9	68.6	44	0	1	1	2	0	2	20.02.2018	1	0	0
249	41923	C	C_F	1	35	180	672	68.5	44	0	1	1	2	0	2	26.02.2018	1	0	0
251	30298	C	C_F	1	39	188	1359	138.5	48	0	1	0	2	0	2	27.02.2015	1	0	0
251	30299	C	C_F	1	39	188	1361.1	138.7	48	0	1	1	2	0	2	27.02.2015	1	0	0
251	30404	C	C_F	1	39	188	1351	137.7	48	0	1	1	2	0	2	06.03.2015	1	0	0
251	30442	C	C_F	1	39	188	1336.3	136.2	48	0	1	1	2	0	2	10.03.2015	1	0	0
251	30522	C	C_F	1	39	188	1313.8	133.9	48	0	1	1	2	0	2	17.03.2015	1	0	0
252	15799	C	C_F	0	38	NaN	729.2	74.3	NaN	0	1	NaN	2	0	1	22.02.2011	1	0	0
252	15860	C	C_F	0	39	NaN	733.2	74.7	NaN	0	1	NaN	2	0	2	01.03.2011	1	0	0
252	15929	C	C_F	0	39	NaN	733.9	74.8	NaN	0	0	0	2	0	2	08.03.2011	1	0	0
253	22931	C	C_F	1	33	185	885.2	90.2	46	0	1	1	2	0	1	01.03.2013	1	0	0
253	22932	C	C_F	1	33	185	883.1	90	46	0	1	0	2	0	1	01.03.2013	1	1	0
253	22980	C	C_F	1	33	185	884.3	90.1	46	0	1	1	2	0	2	07.03.2013	1	0	0
253	23079	C	C_F	1	33	185	894.6	91.2	46	0	1	1	2	0	2	15.03.2013	1	0	0
253	23143	C	C_F	1	33	185	893.8	91.1	46	0	1	1	2	0	2	22.03.2013	1	0	0
253	23212	C	C_F	1	33	185	908.3	92.6	46	0	1	1	2	0	2	29.03.2013	1	0	0
253	23269	C	C_F	1	33	185	894.4	91.2	46	0	1	1	2	0	2	05.04.2013	1	0	0
254	26605	C	C_F	1	35	183	741.5	75.6	42	2	1	1	2	0	1	25.03.2014	0	0	1
254	26606	C	C_F	1	35	183	740.5	75.5	42	2	1	0	2	0	1	25.03.2014	0	0	1
254	26682	C	C_F	1	35	183	739.3	75.4	42	2	1	1	2	0	2	01.04.2014	0	0	1
254	26758	C	C_F	1	35	183	742.5	75.7	42	2	1	1	2	0	2	08.04.2014	0	0	1
255	8754	C	C_F	1	16	NaN	663.2	67.6	NaN	0	1	0	2	0	1	19.02.2009	1	1	0
256	15809	C	C_F	1	16	NaN	663.1	67.6	NaN	0	1	NaN	2	0	1	23.02.2011	1	0	0
256	15878	C	C_F	1	16	NaN	658.8	67.2	NaN	0	0	0	2	0	2	02.03.2011	1	0	0
256	15996	C	C_F	1	16	NaN	662.6	67.5	NaN	0	1	NaN	2	0	2	16.03.2011	1	0	0
257	34295	C	C_F	1	56	179	843.7	86	42.5	1	1	0	2	0	2	22.03.2016	1	0	0
258	26195	C	C_F	1	46	174	912.2	93	42	0	0	0	2	0	1	13.02.2014	1	0	0
258	26244	C	C_F	1	46	174	924.7	94.3	42	0	1	0	2	0	2	19.02.2014	1	0	0
259	15984	C	C_F	1	48	NaN	864.4	88.1	NaN	1	1	0	2	0	1	16.03.2011	1	1	0
259	16050	C	C_F	1	48	NaN	863.2	88	NaN	1	1	0	2	0	2	23.03.2011	1	0	0
260	33972	C	C_F	0	34	166	602.9	61.5	40	0	1	0	2	1	3	23.02.2016	1	0	0
260	34192	C	C_F	0	34	166	617.3	62.9	40	0	1	0	2	1	2	14.03.2016	1	0	0
260	34193	C	C_F	0	34	166	617.9	63	40	0	1	1	2	1	2	14.03.2016	1	0	0
260	34271	C	C_F	0	34	166	619.7	63.2	40	0	1	NaN	2	1	2	21.03.2016	1	0	0
261	33948	C	C_F	0	34	158	532.9	54.3	38	2	2	0	2	0	1	19.02.2016	1	0	0
261	34028	C	C_F	0	23	158	524.8	53.5	38	2	2	0	2	0	2	26.02.2016	1	0	0
262	18692	C	C_F	1	48	NaN	853.5	87	NaN	1	0	0	2	0	1	08.02.2012	1	0	0
262	19026	C	C_F	1	48	NaN	857.4	87.4	NaN	1	1	1	2	0	2	14.03.2012	1	0	0
262	19027	C	C_F	1	48	NaN	857	87.4	NaN	1	1	0	2	0	2	14.03.2012	1	0	0
262	19103	C	C_F	1	48	NaN	858.3	87.5	NaN	1	1	1	2	0	2	21.03.2012	1	0	0
263	23057	C	C_F	1	56	172	850.9	86.7	42	0	1	0	2	0	1	14.03.2013	1	1	0
263	23058	C	C_F	1	56	172	852.7	86.9	42	0	1	1	2	0	1	14.03.2013	1	0	0
263	23120	C	C_F	1	56	172	847.6	86.4	42	0	1	1	2	0	2	21.03.2013	1	0	0
263	23193	C	C_F	1	56	172	840.2	85.6	42	0	1	1	2	0	2	28.03.2013	1	0	0
263	23244	C	C_F	1	56	172	836.3	85.2	42	0	1	NaN	2	0	2	04.04.2013	1	0	0
263	23296	C	C_F	1	57	172	838.9	85.5	42	0	1	NaN	2	0	2	11.04.2013	1	0	0
263	23353	C	C_F	1	57	172	826.9	84.3	42	0	1	NaN	2	0	2	18.04.2013	1	0	0
264	22825	C	C_F	1	44	180	854.7	87.1	43	0	1	0	2	0	1	20.02.2013	1	1	0
264	22907	C	C_F	1	44	180	854.8	87.1	43	0	1	0	2	0	2	27.02.2013	1	0	0
264	22973	C	C_F	1	44	180	851.7	86.8	43	0	1	0	2	0	2	06.03.2013	1	0	0
265	23085	C	C_F	1	37	168	701.6	71.5	42	2	1	0	2	0	1	18.03.2013	0	0	1
265	23152	C	C_F	1	37	168	703	71.7	42	2	1	0	2	0	2	25.03.2013	0	0	1
265	23218	C	C_F	1	37	168	701	71.5	42	2	1	1	2	0	2	02.04.2013	0	0	1
265	23219	C	C_F	1	37	168	699.6	71.3	42	2	1	0	2	0	2	02.04.2013	0	0	1
265	23321	C	C_F	1	37	168	698.7	71.2	42	2	1	1	2	0	2	12.04.2013	0	0	1
265	23376	C	C_F	1	37	168	694.1	70.8	42	2	1	1	2	0	2	19.04.2013	0	0	1
265	23445	C	C_F	1	37	168	692.8	70.6	42	2	1	1	2	0	2	26.04.2013	0	0	1
265	23506	C	C_F	1	37	168	692	70.5	42	2	1	1	2	0	2	06.05.2013	0	0	1
265	25093	C	C_F	1	38	168	707.8	72.2	42	2	1	0	2	1	3	14.10.2013	0	0	1
265	25168	C	C_F	1	38	168	702.7	71.6	42	2	1	0	2	1	2	21.10.2013	0	0	1
265	25169	C	C_F	1	38	168	703.6	71.7	42	2	1	1	2	1	2	21.10.2013	0	0	1
265	25247	C	C_F	1	38	168	716.1	73	42	2	1	NaN	2	1	2	28.10.2013	0	0	1
266	12238	C	C_F	1	49	NaN	943.6	96.2	NaN	1	1	0	2	0	1	11.02.2010	1	1	0
266	12307	C	C_F	1	49	NaN	940.5	95.9	NaN	1	1	0	2	0	2	18.02.2010	1	0	0
266	12392	C	C_F	1	49	NaN	930.8	94.9	NaN	1	1	0	2	0	2	25.02.2010	1	0	0
266	12488	C	C_F	1	49	NaN	929.6	94.8	NaN	1	1	0	2	0	2	04.03.2010	1	0	0
266	12592	C	C_F	1	49	NaN	932.3	95	NaN	1	1	1	2	0	2	12.03.2010	1	0	0
266	12593	C	C_F	1	49	NaN	930.9	94.9	NaN	1	1	0	2	0	2	12.03.2010	1	0	0
267	15871	C	C_F	1	57	NaN	909.7	92.7	NaN	1	1	1	2	0	2	02.03.2011	1	0	0
267	15872	C	C_F	1	57	NaN	908.8	92.6	NaN	1	1	0	2	0	2	02.03.2011	1	0	0
267	15938	C	C_F	1	57	NaN	909.8	92.7	NaN	1	1	1	2	0	2	09.03.2011	1	0	0
267	15995	C	C_F	1	57	NaN	916	93.4	NaN	1	1	1	2	0	2	16.03.2011	1	0	0
267	16062	C	C_F	1	57	NaN	911.6	92.9	NaN	1	1	1	2	0	2	23.03.2011	1	0	0
267	16122	C	C_F	1	57	NaN	909.9	92.8	NaN	1	1	1	2	0	2	30.03.2011	1	0	0
268	26254	C	C_F	1	48	182	818.1	83.4	44	2	1	0	2	0	1	20.02.2014	1	1	0
268	26330	C	C_F	1	48	182	806.5	82.2	44	2	1	1	2	0	2	27.02.2014	1	0	0
268	26331	C	C_F	1	48	182	800.2	81.6	44	2	1	0	2	0	2	27.02.2014	1	0	0
268	26411	C	C_F	1	48	182	795.4	81.1	44	2	1	1	2	0	2	06.03.2014	1	0	0
268	26476	C	C_F	1	48	182	791.8	80.7	44	2	1	1	2	0	2	13.03.2014	1	0	0
268	26521	C	C_F	1	48	182	789.5	80.5	44	2	1	1	2	0	2	18.03.2014	1	0	0
268	26596	C	C_F	1	48	182	790.4	80.6	44	2	1	1	2	0	2	25.03.2014	1	0	0
268	26660	C	C_F	1	48	182	791.7	80.7	44	2	1	1	2	0	2	31.03.2014	1	0	0
269	41735	C	C_F	1	54	196	857	87.4	47	1	2	0	2	0	1	07.02.2018	1	0	0
269	41795	C	C_F	1	54	196	875.7	89.3	47	1	2	0	2	0	2	13.02.2018	1	0	0
269	41887	C	C_F	1	54	196	879.7	89.7	47	1	2	0	2	0	2	21.02.2018	1	0	0
269	41975	C	C_F	1	54	196	907.2	92.5	47	1	1	NaN	2	0	2	28.02.2018	1	0	0
269	42042	C	C_F	1	54	196	908.2	92.6	47	1	1	NaN	2	0	2	07.03.2018	1	0	0
270	823	C	C_F	1	48	NaN	662.2	67.5	NaN	1	1	0	2	0	1	22.02.2007	1	1	0
270	1608	C	C_F	1	48	NaN	666.1	67.9	NaN	1	1	0	2	0	2	30.04.2007	1	0	0
270	5368	C	C_F	1	49	NaN	753.5	76.8	NaN	1	1	0	2	0	2	04.04.2008	1	0	0
270	5466	C	C_F	1	49	NaN	760.9	77.6	NaN	1	1	0	2	0	2	11.04.2008	1	0	0
271	918	C	C_F	1	39	NaN	728.3	74.2	NaN	1	1	0	2	0	1	28.02.2007	0	0	1
271	1328	C	C_F	1	39	NaN	719.3	73.3	NaN	1	1	1	2	0	2	04.04.2007	0	0	1
271	1329	C	C_F	1	39	NaN	713.4	72.7	NaN	1	1	0	2	0	2	04.04.2007	0	0	1
272	19096	C	C_F	1	20	180	713.2	72.7	44	0	1	NaN	2	0	1	21.03.2012	1	0	0
272	19195	C	C_F	1	20	180	698.6	71.2	44	0	1	1	2	0	2	29.03.2012	1	0	0
272	19196	C	C_F	1	20	180	697.8	71.1	44	0	1	0	2	0	2	29.03.2012	1	0	0
273	26271	C	C_F	1	38	183	1223.5	124.7	45	1	1	0	2	0	1	21.02.2014	1	1	0
273	26361	C	C_F	1	38	183	1219.2	124.3	45	1	1	1	2	0	2	28.02.2014	1	0	0
273	26362	C	C_F	1	38	183	1219.7	124.3	45	1	1	0	2	0	2	28.02.2014	1	0	0
273	26429	C	C_F	1	38	183	1223.1	124.7	45	1	1	NaN	2	0	2	07.03.2014	1	0	0
273	26451	C	C_F	1	38	183	1224.5	124.8	45	1	2	0	2	0	2	11.03.2014	1	0	0
273	26452	C	C_F	1	38	183	1216.7	124	45	1	1	1	2	0	2	11.03.2014	1	0	0
274	12570	C	C_F	1	53	NaN	700.6	71.4	NaN	0	1	0	2	0	1	11.03.2010	1	1	0
274	12657	C	C_F	1	53	NaN	699.8	71.3	NaN	0	1	1	2	0	2	18.03.2010	1	0	0
274	12720	C	C_F	1	53	NaN	699.2	71.3	NaN	0	1	0	2	0	2	25.03.2010	1	0	0
274	12783	C	C_F	1	53	NaN	699.3	71.3	NaN	0	1	NaN	2	0	2	01.04.2010	1	0	0
275	26334	C	C_F	1	45	185	769.3	78.4	46	2	1	0	2	0	1	27.02.2014	1	1	0
275	26416	C	C_F	1	45	185	763	77.8	46	2	1	1	2	0	2	06.03.2014	1	0	0
275	26417	C	C_F	1	45	185	763.5	77.8	46	2	1	0	2	0	2	06.03.2014	1	0	0
275	26480	C	C_F	1	45	185	766.3	78.1	46	2	1	1	2	0	2	13.03.2014	1	0	0
275	26553	C	C_F	1	45	185	762.8	77.8	46	2	1	1	2	0	2	20.03.2014	1	0	0
275	26634	C	C_F	1	45	185	769.5	78.4	46	2	1	1	2	0	2	27.03.2014	1	0	0
275	26707	C	C_F	1	45	185	760.9	77.6	46	2	1	1	2	0	2	03.04.2014	1	0	0
276	4972	C	C_F	1	50	NaN	852.7	86.9	NaN	1	1	0	2	0	1	26.02.2008	1	1	0
276	5056	C	C_F	1	50	NaN	867.8	88.5	NaN	1	1	0	2	0	2	04.03.2008	1	0	0
276	5142	C	C_F	1	50	NaN	869.2	88.6	NaN	1	1	0	2	0	2	11.03.2008	1	0	0
276	5227	C	C_F	1	50	NaN	877.5	89.4	NaN	1	2	0	2	0	2	18.03.2008	1	0	0
277	8899	C	C_F	1	36	NaN	746.1	76.1	NaN	2	1	0	2	0	1	04.03.2009	0	0	1
277	9184	C	C_F	1	36	NaN	752.5	76.7	NaN	2	2	0	2	0	2	01.04.2009	0	0	1
278	12383	C	C_F	1	44	NaN	837	85.3	NaN	1	1	0	2	0	1	24.02.2010	1	1	0
278	12479	C	C_F	1	44	NaN	841.9	85.8	NaN	1	1	0	2	0	2	03.03.2010	1	0	0
278	12641	C	C_F	1	44	NaN	846.6	86.3	NaN	1	1	0	2	0	2	17.03.2010	1	0	0
279	30213	C	C_F	1	52	180	1103	112.4	44	1	1	0	2	0	1	25.02.2015	0	0	1
279	30349	C	C_F	1	52	180	1059.6	108	44	1	1	0	2	0	2	04.03.2015	0	0	1
279	30464	C	C_F	1	52	180	1044.9	106.5	44	1	1	0	2	0	2	12.03.2015	0	0	1
279	30611	C	C_F	1	52	180	1008.6	102.8	44	1	1	0	2	0	2	24.03.2015	0	0	1
280	8841	C	C_F	1	32	NaN	805.2	82.1	NaN	2	1	0	2	0	1	26.02.2009	1	1	0
281	15839	C	C_F	1	62	NaN	685.6	69.9	NaN	2	1	0	2	0	1	25.02.2011	0	0	1
281	15850	C	C_F	1	62	NaN	685	69.8	NaN	2	1	0	2	0	2	28.02.2011	0	0	1
281	15915	C	C_F	1	62	NaN	678.7	69.2	NaN	2	1	0	2	0	2	07.03.2011	0	0	1
281	16422	C	C_F	1	62	NaN	678.7	69.2	NaN	2	1	NaN	2	0	2	02.05.2011	0	0	1
283	12363	C	C_F	1	28	NaN	872.9	89	NaN	0	1	0	2	0	1	23.02.2010	0	0	1
283	12457	C	C_F	1	28	NaN	860.5	87.7	NaN	0	1	0	2	0	2	02.03.2010	0	0	1
283	12630	C	C_F	1	28	NaN	864.5	88.1	NaN	0	1	0	2	0	2	17.03.2010	0	0	1
284	9196	C	C_F	1	44	NaN	1010	103	NaN	2	1	NaN	2	1	2	03.04.2009	1	0	0
284	9277	C	C_F	1	44	NaN	999.6	101.9	NaN	2	1	0	2	1	2	10.04.2009	1	0	0
284	9324	C	C_F	1	44	NaN	997.9	101.7	NaN	2	1	1	2	1	2	17.04.2009	1	0	0
284	9325	C	C_F	1	44	NaN	995.6	101.5	NaN	2	1	0	2	1	2	17.04.2009	1	0	0
285	30585	C	C_F	0	50	170	848.7	86.5	39	0	1	NaN	2	0	1	20.03.2015	1	0	0
285	30621	C	C_F	0	50	170	856.7	87.3	39	0	1	NaN	2	0	2	24.03.2015	1	0	0
285	30732	C	C_F	0	50	170	851.2	86.8	39	0	1	NaN	2	0	2	31.03.2015	1	0	0
285	30888	C	C_F	0	50	170	855.8	87.2	39	0	1	NaN	2	0	2	14.04.2015	1	0	0
286	41834	C	C_F	1	52	181	832.6	84.9	43	0	1	0	2	0	1	16.02.2018	1	1	0
286	41910	C	C_F	1	52	181	844.4	86.1	43	0	1	0	2	0	2	23.02.2018	1	0	0
286	42003	C	C_F	1	52	181	841.7	85.8	43	0	1	1	2	0	2	02.03.2018	1	0	0
286	42004	C	C_F	1	52	181	841.5	85.8	43	0	1	0	2	0	2	02.03.2018	1	0	0
286	42093	C	C_F	1	52	181	837.3	85.4	43	0	1	1	2	0	2	09.03.2018	1	0	0
286	42119	C	C_F	1	52	181	831.6	84.8	43	0	1	1	2	0	2	13.03.2018	1	0	0
286	42198	C	C_F	1	52	181	825.9	84.2	43	0	1	1	2	0	2	20.03.2018	1	0	0
286	42276	C	C_F	1	52	181	823.8	84	43	0	1	1	2	0	2	27.03.2018	1	0	0
287	16253	C	C_F	1	22	NaN	924.4	94.2	NaN	1	2	0	2	0	1	13.04.2011	1	0	0
287	16255	C	C_F	1	22	NaN	917.7	93.5	NaN	1	2	0	2	0	2	13.04.2011	1	0	0
288	9205	C	C_F	1	37	NaN	811.1	82.7	NaN	0	1	NaN	2	0	1	03.04.2009	1	0	0
288	9286	C	C_F	1	37	NaN	800.6	81.6	NaN	0	1	NaN	2	0	2	10.04.2009	1	0	0
288	9409	C	C_F	1	37	NaN	806	82.2	NaN	0	2	0	2	0	2	24.04.2009	1	0	0
289	26441	C	C_F	1	28	170	615.9	62.8	43	0	1	NaN	2	0	1	10.03.2014	1	0	0
289	26514	C	C_F	1	28	170	617.8	63	43	0	1	NaN	2	0	2	17.03.2014	1	0	0
289	26588	C	C_F	1	28	170	619.2	63.1	43	0	1	NaN	2	0	2	24.03.2014	1	0	0
289	26663	C	C_F	1	28	170	617.7	63	43	0	1	NaN	2	0	2	31.03.2014	1	0	0
289	26737	C	C_F	1	28	170	625.7	63.8	43	0	1	NaN	2	0	2	07.04.2014	1	0	0
290	8949	C	C_F	1	51	NaN	978.1	99.7	NaN	1	1	0	2	0	1	10.03.2009	1	1	0
290	9012	C	C_F	1	51	NaN	964.2	98.3	NaN	1	1	0	2	0	2	17.03.2009	1	0	0
290	9094	C	C_F	1	51	NaN	967.3	98.6	NaN	1	1	NaN	2	0	2	24.03.2009	1	0	0
290	9169	C	C_F	1	51	NaN	950	96.8	NaN	1	1	NaN	2	0	2	31.03.2009	1	0	0
291	22959	C	C_F	1	31	182	633.2	64.5	43	2	1	NaN	2	0	1	05.03.2013	1	0	0
291	23022	C	C_F	1	31	182	636.8	64.9	43	2	1	NaN	2	0	2	12.03.2013	1	0	0
291	23093	C	C_F	1	31	182	646	65.9	43	2	1	1	2	0	2	19.03.2013	1	0	0
291	23094	C	C_F	1	31	182	514.1	52.4	43	2	1	0	2	0	2	19.03.2013	1	0	0
291	23161	C	C_F	1	31	182	651.1	66.4	43	2	1	1	2	0	2	26.03.2013	1	0	0
292	26825	C	C_F	1	46	190	1175.5	119.8	46	0	1	1	2	0	2	15.04.2014	1	0	0
292	26891	C	C_F	1	46	190	1170.3	119.3	46	0	1	1	2	0	2	22.04.2014	1	0	0
292	26961	C	C_F	1	46	190	1159.8	118.2	46	0	1	1	2	0	2	29.04.2014	1	0	0
293	41904	C	C_F	1	35	190	743.7	75.8	44	0	2	0	2	0	1	22.02.2018	1	0	0
293	41999	C	C_F	1	35	190	750.1	76.5	44	0	2	0	2	0	2	01.03.2018	1	0	0
293	42081	C	C_F	1	35	190	749.1	76.4	44	0	2	0	2	0	2	08.03.2018	1	0	0
293	42144	C	C_F	1	35	190	757.3	77.2	44	0	2	0	2	0	2	14.03.2018	1	0	0
293	42195	C	C_F	1	35	190	739.1	75.3	44	0	2	0	2	0	2	20.03.2018	1	0	0
293	42259	C	C_F	1	35	190	740.3	75.5	44	0	2	0	2	0	2	26.03.2018	1	0	0
293	42378	C	C_F	1	35	190	741.4	75.6	44	0	2	0	2	0	2	04.04.2018	1	0	0
294	8960	C	C_F	1	39	NaN	782.6	79.8	NaN	1	1	0	2	0	1	11.03.2009	0	0	1
294	9031	C	C_F	1	39	NaN	788	80.3	NaN	1	1	NaN	2	0	2	18.03.2009	0	0	1
294	9111	C	C_F	1	39	NaN	787.4	80.3	NaN	1	1	0	2	0	2	25.03.2009	0	0	1
295	15865	C	C_F	1	42	NaN	759.8	77.5	NaN	1	0	0	2	0	1	02.03.2011	1	0	0
295	15931	C	C_F	1	42	NaN	752.9	76.7	NaN	1	1	0	2	0	2	09.03.2011	1	0	0
295	15963	C	C_F	1	42	NaN	751.2	76.6	NaN	1	1	0	2	0	2	14.03.2011	1	0	0
295	16032	C	C_F	1	42	NaN	756.4	77.1	NaN	1	1	0	2	0	2	21.03.2011	1	0	0
295	16100	C	C_F	1	42	NaN	760.1	77.5	NaN	1	1	0	2	0	2	29.03.2011	1	0	0
296	12528	C	C_F	1	46	NaN	905.5	92.3	NaN	0	0	0	2	0	1	09.03.2010	1	0	0
296	12640	C	C_F	1	46	NaN	923.8	94.2	NaN	0	1	0	2	0	2	17.03.2010	1	0	0
296	12711	C	C_F	1	46	NaN	925.5	94.3	NaN	0	1	0	2	0	2	25.03.2010	1	0	0
297	19036	C	C_F	1	31	NaN	1033.1	105.3	NaN	2	1	0	2	0	1	15.03.2012	1	1	0
297	19121	C	C_F	1	31	NaN	1028.7	104.9	NaN	2	1	0	2	0	2	22.03.2012	1	0	0
297	19197	C	C_F	1	31	NaN	1029	104.9	NaN	2	1	0	2	0	2	29.03.2012	1	0	0
299	26469	C	C_F	1	50	183	941.1	95.9	NaN	0	0	0	2	0	1	12.03.2014	1	0	0
299	26542	C	C_F	1	50	183	953.8	97.2	NaN	0	0	0	2	0	2	19.03.2014	1	0	0
300	30447	C	C_F	1	48	180	835.8	85.2	44	1	1	0	2	0	1	11.03.2015	0	0	1
300	30596	C	C_F	1	48	180	823.8	84	44	1	1	0	2	0	2	23.03.2015	0	0	1
301	15934	C	C_F	1	37	NaN	1207.8	123.1	NaN	1	1	0	2	0	1	09.03.2011	0	0	1
301	16052	C	C_F	1	37	NaN	1194.5	121.8	NaN	1	1	0	2	0	2	23.03.2011	0	0	1
301	16108	C	C_F	1	37	NaN	1190.4	121.3	NaN	1	1	0	2	0	2	30.03.2011	0	0	1
301	16181	C	C_F	1	37	NaN	1189.6	121.3	NaN	1	1	1	2	0	2	06.04.2011	0	0	1
301	16182	C	C_F	1	37	NaN	1188.8	121.2	NaN	1	1	0	2	0	2	06.04.2011	0	0	1
301	16250	C	C_F	1	37	NaN	1186.9	121	NaN	1	1	1	2	0	2	13.04.2011	0	0	1
302	5081	C	C_A	1	30	NaN	852.9	86.9	NaN	1	1	0	2	0	1	05.03.2008	1	1	0
302	5175	C	C_A	1	30	NaN	859.3	87.6	NaN	1	1	0	2	0	2	12.03.2008	1	0	0
302	5251	C	C_A	1	30	NaN	846.3	86.3	NaN	1	0	0	2	0	2	19.03.2008	1	0	0
302	5304	C	C_A	1	30	NaN	848.1	86.5	NaN	1	1	0	2	0	2	26.03.2008	1	0	0
302	5432	C	C_A	1	30	NaN	859.2	87.6	NaN	1	1	NaN	2	0	2	09.04.2008	1	0	0
302	5521	C	C_A	1	30	NaN	865	88.2	NaN	1	1	NaN	2	0	2	16.04.2008	1	0	0
303	23361	C	C_F	1	45	NaN	768.4	78.3	NaN	1	1	0	2	0	1	18.04.2013	1	0	0
304	30489	C	C_F	1	60	175	889.1	90.6	43	1	1	0	2	0	1	13.03.2015	0	0	1
304	30684	C	C_F	1	60	175	882	89.9	43	1	1	0	2	0	2	27.03.2015	0	0	1
305	34263	C	C_F	1	56	183	1088.3	110.9	43	0	1	0	2	0	1	18.03.2016	0	0	1
305	34392	C	C_F	1	56	183	1114.3	113.6	43	0	1	0	2	0	2	31.03.2016	0	0	1
305	34474	C	C_F	1	56	183	1100.5	112.2	43	0	1	0	2	0	2	07.04.2016	0	0	1
306	5222	C	C_F	1	33	NaN	1064.6	108.5	NaN	0	1	0	2	0	1	18.03.2008	1	1	0
306	10196	C	C_F	1	35	NaN	916.6	93.4	NaN	0	1	0	2	1	3	07.07.2009	1	0	0
306	10362	C	C_F	1	35	NaN	926.1	94.4	NaN	0	1	0	2	1	2	21.07.2009	1	0	0
306	10440	C	C_F	1	35	NaN	943.2	96.1	NaN	0	2	0	2	1	2	28.07.2009	1	0	0
307	30514	C	C_F	1	31	167	920.5	93.8	42	2	1	0	2	0	1	17.03.2015	1	1	0
307	30678	C	C_F	1	31	167	913.5	93.1	42	2	1	0	2	0	2	27.03.2015	1	0	0
307	30717	C	C_F	1	31	167	909.3	92.7	42	2	1	0	2	0	2	31.03.2015	1	0	0
307	30894	C	C_F	1	31	167	915.9	93.4	42	2	1	0	2	0	2	15.04.2015	1	0	0
307	31649	C	C_F	1	32	167	954.2	97.3	42	2	1	0	2	1	3	02.07.2015	1	0	0
307	31722	C	C_F	1	32	167	953.5	97.2	42	2	1	0	2	1	2	09.07.2015	1	0	0
307	31787	C	C_F	1	32	167	956.1	97.5	42	2	1	0	2	1	2	15.07.2015	1	0	0
307	31868	C	C_F	1	32	167	945.2	96.4	42	2	1	0	2	1	2	22.07.2015	1	0	0
307	31941	C	C_F	1	32	167	958.3	97.7	42	2	2	0	2	1	2	29.07.2015	1	0	0
307	32055	C	C_F	1	32	167	949.2	96.8	42	2	2	0	2	1	2	10.08.2015	1	0	0
307	32114	C	C_F	1	32	167	956.4	97.5	42	2	2	0	2	1	2	17.08.2015	1	0	0
308	26492	C	C_F	1	57	172	682.2	69.5	42	0	1	0	2	0	1	13.03.2014	1	1	0
308	26566	C	C_F	1	57	172	687.2	70.1	42	0	1	0	2	0	2	20.03.2014	1	0	0
308	26567	C	C_F	1	57	172	687.6	70.1	42	0	1	1	2	0	2	20.03.2014	1	0	0
308	26644	C	C_F	1	57	172	670.7	68.4	42	0	1	1	2	0	2	27.03.2014	1	0	0
308	26719	C	C_F	1	57	172	683	69.6	42	0	1	1	2	0	2	03.04.2014	1	0	0
308	26791	C	C_F	1	57	172	682.9	69.6	42	0	1	1	2	0	2	10.04.2014	1	0	0
309	5129	C	C_F	1	52	NaN	820.3	83.6	NaN	1	1	0	2	0	1	10.03.2008	1	1	0
309	5215	C	C_F	1	52	NaN	817.4	83.3	NaN	1	1	0	2	0	2	17.03.2008	1	0	0
310	30528	C	C_F	1	50	173	658.4	67.1	41	0	1	0	2	0	1	18.03.2015	1	1	0
310	30669	C	C_F	1	50	173	669.4	68.2	41	0	1	0	2	0	2	27.03.2015	1	0	0
310	30753	C	C_F	1	50	173	686.7	70	41	0	1	0	2	0	2	01.04.2015	1	0	0
310	30754	C	C_F	1	50	173	688.4	70.2	41	0	1	1	2	0	2	01.04.2015	1	0	0
310	30805	C	C_F	1	50	173	688.7	70.2	41	0	1	1	2	0	2	09.04.2015	1	0	0
310	30873	C	C_F	1	50	173	692.8	70.6	41	0	1	1	2	0	2	14.04.2015	1	0	0
311	34229	C	C_F	1	38	190	1206.2	123	45	1	1	0	2	0	1	16.03.2016	1	1	0
311	34323	C	C_F	1	38	190	1202	122.5	45	1	1	0	2	0	2	24.03.2016	1	0	0
311	34372	C	C_F	1	38	190	1203.4	122.7	45	1	1	0	2	0	2	30.03.2016	1	0	0
311	34424	C	C_F	1	38	190	1171.8	119.4	45	1	1	0	2	0	2	04.04.2016	1	0	0
311	34526	C	C_F	1	38	190	1174.6	119.7	45	1	1	0	2	0	2	12.04.2016	1	0	0
312	30526	C	C_F	1	44	178	724.3	73.8	43	1	1	0	2	0	1	18.03.2015	1	1	0
312	30627	C	C_F	1	44	178	718.3	73.2	43	1	1	0	2	0	2	25.03.2015	1	0	0
312	30628	C	C_F	1	44	178	719.7	73.4	43	1	1	1	2	0	2	25.03.2015	1	0	0
312	30707	C	C_F	1	44	178	726	74	43	1	1	1	2	0	2	30.03.2015	1	0	0
314	26047	C	C_F	1	32	181	809	82.5	43	1	1	0	2	1	3	30.01.2014	1	0	0
314	26173	C	C_F	1	32	181	821.8	83.8	43	1	1	0	2	1	2	12.02.2014	1	0	0
314	26310	C	C_F	1	32	181	834.2	85	43	1	1	0	2	1	2	26.02.2014	1	0	0
314	20085	C	C_F	1	30	181	807.3	82.3	43	1	1	NaN	2	0	1	24.05.2012	1	0	0
314	20164	C	C_F	1	30	181	812.4	82.8	43	1	1	NaN	2	0	2	04.06.2012	1	0	0
315	18976	C	C_F	1	51	185	997	101.6	45	0	1	0	2	0	1	09.03.2012	1	1	0
315	19141	C	C_F	1	51	185	1011.3	103.1	45	0	2	0	2	0	2	23.03.2012	1	0	0
315	19213	C	C_F	1	51	185	1004.9	102.4	45	0	1	0	2	0	2	30.03.2012	1	0	0
315	19336	C	C_F	1	51	185	973.1	99.2	45	0	1	0	2	0	2	13.04.2012	1	0	0
315	19449	C	C_F	1	51	185	968	98.7	45	0	1	0	2	0	2	20.04.2012	1	0	0
315	19637	C	C_F	1	51	185	982.5	100.2	45	0	2	0	2	0	2	27.04.2012	1	0	0
315	19726	C	C_F	1	51	185	983.5	100.3	45	0	2	0	2	0	2	04.05.2012	1	0	0
315	20087	C	C_F	1	51	185	994.4	101.4	45	0	2	0	2	0	2	25.05.2012	1	0	0
316	1090	C	C_F	1	39	NaN	802.3	81.8	NaN	2	0	0	2	0	1	15.03.2007	1	0	0
316	1166	C	C_F	1	39	NaN	807.7	82.3	NaN	2	1	0	2	0	2	22.03.2007	1	0	0
317	19040	C	C_F	1	53	184	729.8	74.4	44	0	1	0	2	0	1	15.03.2012	0	0	1
317	19782	C	C_F	1	53	184	746.1	76.1	44	0	1	1	2	0	2	08.05.2012	0	0	1
317	19783	C	C_F	1	53	184	743.8	75.8	44	0	1	0	2	0	2	08.05.2012	0	0	1
317	19943	C	C_F	1	53	184	747.5	76.2	44	0	1	NaN	2	0	2	15.05.2012	0	0	1
318	23144	C	C_F	1	56	NaN	870.1	88.7	NaN	0	1	0	2	0	1	22.03.2013	1	1	0
318	23206	C	C_F	1	56	NaN	877.5	89.4	NaN	0	1	0	2	0	2	29.03.2013	1	0	0
318	23262	C	C_F	1	56	NaN	881.5	89.9	NaN	0	1	0	2	0	2	05.04.2013	1	0	0
318	23316	C	C_F	1	56	NaN	878.5	89.6	NaN	0	1	0	2	0	2	12.04.2013	1	0	0
318	23372	C	C_F	1	56	NaN	883	90	NaN	0	1	1	2	0	2	19.04.2013	1	0	0
318	23373	C	C_F	1	56	NaN	880.1	89.7	NaN	0	1	0	2	0	2	19.04.2013	1	0	0
318	23443	C	C_F	1	56	NaN	876.8	89.4	NaN	0	1	1	2	0	2	26.04.2013	1	0	0
319	34306	C	C_F	1	43	180	957.7	97.6	43	1	1	0	2	0	1	23.03.2016	1	1	0
319	34399	C	C_F	1	43	180	935.5	95.4	43	1	1	0	2	0	2	31.03.2016	1	0	0
319	34455	C	C_F	1	43	180	946.9	96.5	43	1	1	0	2	0	2	06.04.2016	1	0	0
319	34528	C	C_F	1	43	180	931.2	94.9	43	1	1	0	2	0	2	12.04.2016	1	0	0
320	1338	C	C_F	1	46	NaN	710.1	72.4	NaN	0	1	0	2	0	1	04.04.2007	1	1	0
320	1403	C	C_F	1	46	NaN	706.3	72	NaN	0	1	0	2	0	2	11.04.2007	1	0	0
320	1734	C	C_F	1	46	NaN	725.2	73.9	NaN	0	1	0	2	0	2	11.05.2007	1	0	0
320	1786	C	C_F	1	46	NaN	710.3	72.4	NaN	0	1	0	2	0	2	18.05.2007	1	0	0
321	19069	C	C_F	1	51	174	792.2	80.8	42	0	1	0	2	0	1	19.03.2012	0	0	1
321	19156	C	C_F	1	51	174	796.2	81.2	42	0	1	0	2	0	2	26.03.2012	0	0	1
321	19238	C	C_F	1	51	174	799.2	81.5	42	0	1	0	2	0	2	03.04.2012	0	0	1
321	19296	C	C_F	1	51	174	784.6	80	42	0	1	0	2	0	2	10.04.2012	0	0	1
321	19518	C	C_F	1	51	174	793.7	80.9	42	0	1	NaN	2	0	2	24.04.2012	0	0	1
321	19786	C	C_F	1	51	174	769.4	78.4	42	0	1	NaN	2	0	2	08.05.2012	0	0	1
321	19939	C	C_F	1	51	174	775.9	79.1	42	0	1	NaN	2	0	2	15.05.2012	0	0	1
321	20020	C	C_F	1	51	174	786.2	80.1	42	0	1	NaN	2	0	2	22.05.2012	0	0	1
323	5199	C	C_F	1	47	NaN	912.9	93.1	NaN	1	1	0	2	0	1	14.03.2008	1	1	0
323	5256	C	C_F	1	47	NaN	912.6	93	NaN	1	1	1	2	0	2	20.03.2008	1	0	0
323	5257	C	C_F	1	47	NaN	912	93	NaN	1	1	0	2	0	2	20.03.2008	1	0	0
323	5306	C	C_F	1	47	NaN	909.3	92.7	NaN	1	1	1	2	0	2	27.03.2008	1	0	0
324	16172	C	C_F	1	46	NaN	702.9	71.7	NaN	0	1	0	2	0	2	05.04.2011	1	0	0
324	16241	C	C_F	1	46	NaN	702.4	71.6	NaN	0	1	0	2	0	2	12.04.2011	1	0	0
324	16329	C	C_F	1	46	NaN	705.2	71.9	NaN	0	1	0	2	0	2	20.04.2011	1	0	0
324	16381	C	C_F	1	46	NaN	704.8	71.8	NaN	0	2	0	2	0	2	27.04.2011	1	0	0
324	16445	C	C_F	1	46	NaN	698.1	71.2	NaN	0	1	0	2	0	2	04.05.2011	1	0	0
324	16497	C	C_F	1	46	NaN	693.9	70.7	NaN	0	1	0	2	0	2	10.05.2011	1	0	0
324	16551	C	C_F	1	46	NaN	693.3	70.7	NaN	0	1	0	2	0	2	17.05.2011	1	0	0
325	42233	C	C_F	1	59	175	719.8	73.4	41	1	1	0	2	0	2	22.03.2018	1	0	0
325	42328	C	C_F	1	59	175	712.4	72.6	41	1	1	0	2	0	2	30.03.2018	1	0	0
326	34309	C	C_F	1	33	180	780.4	79.6	44	1	1	0	2	0	1	23.03.2016	1	1	0
326	34414	C	C_F	1	33	180	792.4	80.8	44	1	1	0	2	0	2	01.04.2016	1	0	0
327	1625	C	C_F	1	41	NaN	942.9	96.1	NaN	1	1	0	2	0	2	02.05.2007	1	0	0
327	1691	C	C_F	1	41	NaN	940.7	95.9	NaN	1	1	0	2	0	2	08.05.2007	1	0	0
327	1760	C	C_F	1	41	NaN	937.8	95.6	NaN	1	1	0	2	0	2	15.05.2007	1	0	0
328	12792	C	C_F	1	33	NaN	757.9	77.3	NaN	2	1	0	2	0	1	02.04.2010	1	1	0
328	12849	C	C_F	1	33	NaN	752.2	76.7	NaN	2	1	NaN	2	0	2	09.04.2010	1	0	0
328	12911	C	C_F	1	33	NaN	747.5	76.2	NaN	2	1	NaN	2	0	2	16.04.2010	1	0	0
328	12997	C	C_F	1	33	NaN	749.7	76.4	NaN	2	1	NaN	2	0	2	27.04.2010	1	0	0
328	13068	C	C_F	1	33	NaN	757.4	77.2	NaN	2	2	0	2	0	2	04.05.2010	1	0	0
329	1206	C	C_F	1	49	NaN	710.4	72.4	NaN	0	1	0	2	0	1	26.03.2007	1	1	0
330	12699	C	C_F	1	68	NaN	864	88.1	NaN	1	1	0	2	0	1	24.03.2010	1	0	0
330	12759	C	C_F	1	68	NaN	852.1	86.9	NaN	1	1	0	2	0	2	31.03.2010	1	0	0
330	12845	C	C_F	1	68	NaN	844.4	86.1	NaN	1	1	0	2	0	2	08.04.2010	1	0	0
331	34394	C	C_F	1	44	185	713.9	72.8	43	0	1	NaN	2	0	1	31.03.2016	1	0	0
331	34470	C	C_F	1	44	185	717.2	73.1	43	0	1	1	2	0	2	07.04.2016	1	0	0
331	34471	C	C_F	1	44	185	717.3	73.1	43	0	1	0	2	0	2	07.04.2016	1	0	0
331	34552	C	C_F	1	44	185	732.2	74.6	43	0	1	1	2	0	2	14.04.2016	1	0	0
332	34335	C	C_F	1	56	173	979.7	99.9	45	0	1	0	2	0	1	25.03.2016	0	0	1
332	34364	C	C_F	1	56	173	981.7	100.1	45	0	1	0	2	0	2	29.03.2016	0	0	1
332	34484	C	C_F	1	56	173	969.3	98.8	45	0	1	0	2	0	2	07.04.2016	0	0	1
332	34549	C	C_F	1	56	173	961.9	98.1	45	0	1	0	2	0	2	13.04.2016	0	0	1
333	19239	C	C_F	1	52	183	834.1	85	43	0	2	0	2	0	2	03.04.2012	1	0	0
333	19299	C	C_F	1	52	183	834.1	85	43	0	2	0	2	0	2	10.04.2012	1	0	0
333	19521	C	C_F	1	52	183	835.6	85.2	43	0	2	0	2	0	2	24.04.2012	1	0	0
334	5555	C	C_F	1	32	NaN	1229.6	125.3	NaN	1	1	0	2	0	1	18.04.2008	0	0	1
334	5659	C	C_F	1	32	NaN	1214.6	123.8	NaN	1	1	NaN	2	0	2	25.04.2008	0	0	1
334	5766	C	C_F	1	32	NaN	1229.1	125.3	NaN	1	2	0	2	0	2	05.05.2008	0	0	1
335	26751	C	C_F	1	48	175	796	81.1	42	1	1	0	2	0	1	08.04.2014	0	0	1
335	26875	C	C_F	1	48	175	788.7	80.4	42	1	1	0	2	0	2	17.04.2014	0	0	1
336	26686	C	C_F	1	36	187	783.6	79.9	47	2	1	0	2	0	1	01.04.2014	1	1	0
336	26765	C	C_F	1	36	187	790.1	80.5	47	2	2	0	2	0	2	08.04.2014	1	0	0
336	26815	C	C_F	1	36	187	786.3	80.2	47	2	2	0	2	0	2	14.04.2014	1	0	0
336	26927	C	C_F	1	36	187	785.9	80.1	47	2	2	0	2	0	2	24.04.2014	1	0	0
338	23507	C	C_F	1	33	178	705.6	71.9	42	1	1	0	2	0	1	06.05.2013	1	1	0
338	23508	C	C_F	1	33	178	707.8	72.2	42	1	1	1	2	0	1	06.05.2013	1	0	0
338	23555	C	C_F	1	33	178	700.1	71.4	42	1	1	1	2	0	2	13.05.2013	1	0	0
339	16162	C	C_F	1	36	NaN	883.6	90.1	NaN	1	0	0	2	0	1	04.04.2011	1	0	0
339	16420	C	C_F	1	36	NaN	889.9	90.7	NaN	1	1	1	2	0	2	02.05.2011	1	0	0
340	5425	C	C_F	1	48	NaN	999.1	101.8	NaN	1	0	0	2	0	1	09.04.2008	1	0	0
340	5512	C	C_F	1	48	NaN	1004.5	102.4	NaN	1	1	NaN	2	0	2	16.04.2008	1	0	0
341	9334	C	C_F	1	54	NaN	1017.9	103.8	NaN	1	1	1	2	0	1	17.04.2009	1	0	0
341	9335	C	C_F	1	54	NaN	1017.9	103.8	NaN	1	1	0	2	0	1	17.04.2009	1	1	0
341	9434	C	C_F	1	54	NaN	1011.6	103.1	NaN	1	1	NaN	2	0	2	28.04.2009	1	0	0
341	9495	C	C_F	1	54	NaN	1013.4	103.3	NaN	1	1	NaN	2	0	2	05.05.2009	1	0	0
342	5295	C	C_F	1	48	NaN	763.5	77.8	NaN	0	0	0	2	0	1	26.03.2008	1	0	0
342	5337	C	C_F	1	48	NaN	777.6	79.3	NaN	0	0	0	2	0	2	31.03.2008	1	0	0
343	26826	C	C_F	0	57	170	669.9	68.3	40	0	1	1	2	0	1	15.04.2014	0	0	1
343	26827	C	C_F	0	57	170	668.3	68.1	40	0	1	0	2	0	1	15.04.2014	0	0	1
343	26890	C	C_F	0	57	170	670.2	68.3	40	0	1	1	2	0	2	22.04.2014	0	0	1
343	26962	C	C_F	0	57	170	679.5	69.3	40	0	1	1	2	0	2	29.04.2014	0	0	1
344	12753	C	C_F	1	50	NaN	1021.3	104.1	NaN	1	1	0	2	0	1	31.03.2010	1	1	0
344	12821	C	C_F	1	50	NaN	1020.3	104	NaN	1	1	0	2	0	2	07.04.2010	1	0	0
344	12883	C	C_F	1	50	NaN	1009.5	102.9	NaN	1	1	0	2	0	2	14.04.2010	1	0	0
344	12951	C	C_F	1	50	NaN	1016	103.6	NaN	1	1	NaN	2	0	2	21.04.2010	1	0	0
345	23389	C	C_F	1	56	NaN	1104.6	112.6	NaN	0	1	0	2	0	2	22.04.2013	1	0	0
345	23749	C	C_F	1	56	NaN	1089.9	111.1	NaN	0	1	0	2	0	2	04.06.2013	1	0	0
347	19390	C	C_F	1	38	NaN	898.9	91.6	NaN	0	1	NaN	2	0	1	18.04.2012	1	0	0
347	19582	C	C_F	1	38	NaN	902.5	92	NaN	0	1	NaN	2	0	2	25.04.2012	1	0	0
348	12942	C	C_F	1	58	NaN	512.6	52.3	NaN	1	1	1	2	0	1	20.04.2010	0	0	1
348	12943	C	C_F	1	58	NaN	510.4	52	NaN	1	1	0	2	0	1	20.04.2010	0	0	1
348	12995	C	C_F	1	58	NaN	507.6	51.7	NaN	1	1	1	2	0	2	27.04.2010	0	0	1
348	13069	C	C_F	1	58	NaN	508.7	51.9	NaN	1	1	1	2	0	2	04.05.2010	0	0	1
348	13142	C	C_F	1	58	NaN	507.3	51.7	NaN	1	1	1	2	0	2	11.05.2010	0	0	1
348	13205	C	C_F	1	58	NaN	503.4	51.3	NaN	1	1	1	2	0	2	18.05.2010	0	0	1
349	12852	C	C_F	1	50	NaN	848.1	86.5	NaN	1	1	0	2	0	2	09.04.2010	1	0	0
349	12981	C	C_F	1	50	NaN	830.4	84.6	NaN	1	1	0	2	0	2	23.04.2010	1	0	0
349	13083	C	C_F	1	50	NaN	844.6	86.1	NaN	1	2	0	2	0	2	05.05.2010	1	0	0
350	30921	C	C_F	1	30	176	1023.3	104.3	43	1	1	0	2	0	1	17.04.2015	0	0	1
350	30966	C	C_F	1	30	176	1014.2	103.4	43	1	1	0	2	0	2	23.04.2015	0	0	1
350	31020	C	C_F	1	30	176	1023.8	104.4	43	1	1	0	2	0	2	28.04.2015	0	0	1
350	31083	C	C_F	1	30	176	1028.6	104.9	43	1	1	0	2	0	2	05.05.2015	0	0	1
350	31143	C	C_F	1	30	176	1027.9	104.8	43	1	1	0	2	0	2	11.05.2015	0	0	1
350	31144	C	C_F	1	30	176	1029.3	104.9	43	1	1	1	2	0	2	11.05.2015	0	0	1
350	31220	C	C_F	1	30	176	1024.3	104.4	43	1	1	1	2	0	2	18.05.2015	0	0	1
350	31333	C	C_F	1	30	176	1000.7	102	42	1	1	NaN	2	0	2	29.05.2015	0	0	1
350	31433	C	C_F	1	31	176	1000.5	102	42	1	1	1	2	0	2	09.06.2015	0	0	1
351	1584	C	C_F	1	44	NaN	898.3	91.6	NaN	1	1	1	2	0	1	27.04.2007	1	0	0
351	1650	C	C_F	1	44	NaN	902.3	92	NaN	1	1	1	2	0	2	04.05.2007	1	0	0
352	23345	C	C_F	1	60	172	901.7	91.9	42	1	2	0	2	0	1	17.04.2013	1	0	0
352	23453	C	C_F	1	60	172	921.4	93.9	42	1	2	0	2	0	2	29.04.2013	1	0	0
352	23505	C	C_F	1	60	172	907.8	92.5	42	1	2	0	2	0	2	06.05.2013	1	0	0
352	23557	C	C_F	1	60	172	911.3	92.9	42	1	2	0	2	0	2	13.05.2013	1	0	0
353	26801	C	C_F	1	56	174	929.6	94.8	43	1	1	NaN	2	0	1	11.04.2014	1	0	0
353	26848	C	C_F	1	56	174	936.5	95.5	43	1	1	0	2	0	2	16.04.2014	1	0	0
353	26979	C	C_F	1	56	174	971.1	99	43	1	1	0	2	0	2	30.04.2014	1	0	0
353	27028	C	C_F	1	56	174	973.2	99.2	43	1	1	0	2	0	2	07.05.2014	1	0	0
353	27117	C	C_F	1	56	174	969.4	98.8	43	1	1	0	2	0	2	14.05.2014	1	0	0
353	27271	C	C_F	1	56	174	972.3	99.1	43	1	1	NaN	2	0	2	02.06.2014	1	0	0
353	32821	C	C_F	1	57	174	992.5	101.2	43	1	2	0	2	1	3	02.11.2015	1	0	0
355	34488	C	C_F	1	32	175	739.6	75.4	41	1	1	NaN	2	0	1	08.04.2016	1	0	0
356	18646	C	C_F	1	24	NaN	1042.3	106.2	NaN	2	1	0	2	1	3	02.02.2012	1	0	0
356	18682	C	C_F	1	24	NaN	1049.8	107	NaN	2	1	0	2	1	2	07.02.2012	1	0	0
356	18748	C	C_F	1	24	NaN	1039.8	106	NaN	2	1	1	2	1	2	14.02.2012	1	0	0
356	18749	C	C_F	1	24	NaN	1040	106	NaN	2	1	0	2	1	2	14.02.2012	1	0	0
356	18810	C	C_F	1	24	NaN	1036.4	105.6	NaN	2	1	1	2	1	2	21.02.2012	1	0	0
356	18882	C	C_F	1	24	NaN	1032.7	105.3	NaN	2	1	1	2	1	2	28.02.2012	1	0	0
356	18950	C	C_F	1	24	NaN	1039.7	106	NaN	2	1	1	2	1	2	06.03.2012	1	0	0
356	16350	C	C_F	1	23	NaN	971.4	99	NaN	2	1	0	2	0	1	21.04.2011	1	1	0
356	16397	C	C_F	1	23	NaN	969.8	98.9	NaN	2	1	0	2	0	2	28.04.2011	1	0	0
357	34520	C	C_F	1	38	192	787.8	80.3	45	1	1	0	2	0	1	12.04.2016	0	0	1
358	26900	C	C_F	1	34	183	832.2	84.8	44	0	1	0	2	0	1	23.04.2014	1	1	0
358	26985	C	C_F	1	34	183	831.5	84.8	44	0	1	0	2	0	2	30.04.2014	1	0	0
358	27018	C	C_F	1	34	183	820.3	83.6	44	0	1	0	2	0	2	06.05.2014	1	0	0
359	31121	C	C_F	1	53	176	739.9	75.4	43	0	1	0	2	0	1	07.05.2015	0	0	1
359	31156	C	C_F	1	53	176	751.7	76.6	43	0	1	0	2	0	2	11.05.2015	0	0	1
359	31250	C	C_F	1	53	176	744.7	75.9	43	0	1	0	2	0	2	21.05.2015	0	0	1
359	31251	C	C_F	1	53	176	748.3	76.3	43	0	1	1	2	0	2	21.05.2015	0	0	1
359	31331	C	C_F	1	53	176	741.8	75.6	43	0	1	1	2	0	2	29.05.2015	0	0	1
359	31387	C	C_F	1	53	176	748.9	76.3	43	0	1	1	2	0	2	03.06.2015	0	0	1
359	31447	C	C_F	1	53	176	747.5	76.2	43	0	1	1	2	0	2	10.06.2015	0	0	1
359	31590	C	C_F	1	53	176	755.8	77	43	0	1	1	2	0	2	25.06.2015	0	0	1
360	31057	C	C_F	1	43	NaN	1097.3	111.9	NaN	0	1	NaN	2	0	1	30.04.2015	1	0	0
360	31136	C	C_F	1	43	NaN	1089.6	111.1	NaN	0	1	NaN	2	0	2	08.05.2015	1	0	0
360	31189	C	C_F	1	43	NaN	1075.2	109.6	NaN	0	1	NaN	2	0	2	13.05.2015	1	0	0
360	31236	C	C_F	1	43	NaN	1063.4	108.4	NaN	0	1	NaN	2	0	2	19.05.2015	1	0	0
361	26892	C	C_F	1	54	166	794.7	81	42	0	1	0	2	0	1	22.04.2014	1	1	0
361	26963	C	C_F	1	54	166	794.2	81	42	0	1	0	2	0	2	29.04.2014	1	0	0
361	27032	C	C_F	1	54	166	810.2	82.6	42	0	1	0	2	0	2	07.05.2014	1	0	0
361	27112	C	C_F	1	54	166	794	80.9	42	0	1	0	2	0	2	14.05.2014	1	0	0
362	42443	C	C_F	0	20	172	538.5	54.9	39	2	1	0	2	0	1	10.04.2018	0	0	1
364	1505	C	C_F	1	27	NaN	945.2	96.4	NaN	0	1	NaN	2	0	1	20.04.2007	1	0	0
364	1589	C	C_F	1	27	NaN	939.8	95.8	NaN	0	1	NaN	2	0	2	27.04.2007	1	0	0
364	1655	C	C_F	1	27	NaN	939.6	95.8	NaN	0	1	NaN	2	0	2	04.05.2007	1	0	0
365	23535	C	C_F	1	53	182	707.5	72.1	44	0	1	0	2	0	1	10.05.2013	1	0	0
365	23574	C	C_F	1	53	182	694.1	70.8	44	0	1	0	2	0	2	14.05.2013	1	0	0
365	23711	C	C_F	1	53	182	715.2	72.9	44	0	2	0	2	0	2	28.05.2013	1	0	0
365	23760	C	C_F	1	53	182	708.8	72.3	44	0	2	0	2	0	2	04.06.2013	1	0	0
366	27248	C	C_F	1	52	179	796.8	81.2	43	0	1	1	2	0	1	28.05.2014	1	0	0
368	5587	C	C_F	1	43	NaN	874.7	89.2	NaN	1	1	0	2	0	1	22.04.2008	0	0	1
368	5707	C	C_F	1	43	NaN	871.2	88.8	NaN	1	1	1	2	0	2	29.04.2008	0	0	1
368	5823	C	C_F	1	43	NaN	870.5	88.7	NaN	1	1	1	2	0	2	08.05.2008	0	0	1
368	5882	C	C_F	1	43	NaN	864.5	88.1	NaN	1	1	1	2	0	2	15.05.2008	0	0	1
368	6711	C	C_F	1	43	NaN	850.2	86.7	NaN	1	2	0	2	1	3	01.08.2008	0	0	1
368	6784	C	C_F	1	43	NaN	863.5	88	NaN	1	2	0	2	1	2	08.08.2008	0	0	1
368	6969	C	C_F	1	43	NaN	865.4	88.2	NaN	1	1	NaN	2	1	2	22.08.2008	0	0	1
368	7068	C	C_F	1	43	NaN	862.9	88	NaN	1	1	NaN	2	1	2	29.08.2008	0	0	1
368	7240	C	C_F	1	43	NaN	861.7	87.8	NaN	1	1	NaN	2	1	2	12.09.2008	0	0	1
369	27057	C	C_F	1	42	186	1101.6	112.3	42	0	1	0	2	0	1	08.05.2014	1	1	0
369	27131	C	C_F	1	42	186	1101.7	112.3	42	0	1	0	2	0	2	15.05.2014	1	0	0
369	27197	C	C_F	1	42	186	1093.9	111.5	42	0	1	0	2	0	2	22.05.2014	1	0	0
371	5526	C	C_F	1	45	NaN	1026.6	104.6	NaN	0	1	0	2	0	1	17.04.2008	0	0	1
371	5733	C	C_F	1	45	NaN	1030.6	105.1	NaN	0	1	1	2	0	2	30.04.2008	0	0	1
371	5734	C	C_F	1	45	NaN	1029.6	105	NaN	0	1	0	2	0	2	30.04.2008	0	0	1
371	5801	C	C_F	1	45	NaN	1016.8	103.6	NaN	0	1	1	2	0	2	07.05.2008	0	0	1
371	5877	C	C_F	1	45	NaN	1007.1	102.7	NaN	0	1	1	2	0	2	15.05.2008	0	0	1
371	5912	C	C_F	1	45	NaN	1027.3	104.7	NaN	0	2	0	2	0	2	20.05.2008	0	0	1
371	5959	C	C_F	1	45	NaN	1018.1	103.8	NaN	0	2	0	2	0	2	26.05.2008	0	0	1
371	6009	C	C_F	1	45	NaN	1031	105.1	NaN	0	2	0	2	0	2	29.05.2008	0	0	1
372	27273	C	C_F	1	34	165	843.7	86	40	0	1	0	2	0	2	02.06.2014	1	0	0
373	9523	C	C_F	1	48	NaN	733.2	74.7	NaN	0	1	0	2	0	1	07.05.2009	0	0	1
373	9615	C	C_F	1	48	NaN	722.8	73.7	NaN	0	1	0	2	0	2	14.05.2009	0	0	1
373	9686	C	C_F	1	48	NaN	716.8	73.1	NaN	0	1	0	2	0	2	20.05.2009	0	0	1
373	9758	C	C_F	1	48	NaN	710.9	72.5	NaN	0	1	0	2	0	2	28.05.2009	0	0	1
373	9915	C	C_F	1	48	NaN	722.5	73.6	NaN	0	1	1	2	0	2	10.06.2009	0	0	1
373	9916	C	C_F	1	48	NaN	721.7	73.6	NaN	0	1	0	2	0	2	10.06.2009	0	0	1
373	9979	C	C_F	1	48	NaN	708.3	72.2	NaN	0	1	1	2	0	2	17.06.2009	0	0	1
374	16525	C	C_F	0	37	NaN	627.8	64	NaN	0	1	0	2	0	1	12.05.2011	1	1	0
374	16577	C	C_F	0	37	NaN	626.2	63.8	NaN	0	1	0	2	0	2	19.05.2011	1	0	0
374	16608	C	C_F	0	37	NaN	636.6	64.9	NaN	0	1	0	2	0	2	24.05.2011	1	0	0
374	16679	C	C_F	0	38	NaN	635.5	64.8	NaN	0	1	0	2	0	2	31.05.2011	1	0	0
374	16732	C	C_F	0	38	NaN	641.2	65.4	NaN	0	1	0	2	0	2	07.06.2011	1	0	0
375	1721	C	C_F	0	55	NaN	687.3	70.1	NaN	1	1	0	2	0	1	10.05.2007	1	1	0
376	31368	C	C_F	1	42	186	816.7	83.3	44	1	1	0	2	0	1	03.06.2015	1	1	0
376	31429	C	C_F	1	42	186	816.8	83.3	44	1	1	0	2	0	2	09.06.2015	1	0	0
377	1859	C	C_F	0	42	NaN	1071.4	109.2	NaN	0	1	NaN	2	0	2	25.05.2007	1	0	0
377	1974	C	C_F	0	42	NaN	1082.5	110.3	NaN	0	1	NaN	2	0	2	08.06.2007	1	0	0
378	27236	C	C_F	1	46	167	755.3	77	42	0	1	0	2	0	1	27.05.2014	0	0	1
378	27297	C	C_F	1	46	167	753.1	76.8	42	0	1	0	2	0	2	04.06.2014	0	0	1
378	27298	C	C_F	1	46	167	755.1	77	42	0	1	1	2	0	2	04.06.2014	0	0	1
378	27404	C	C_F	1	46	167	754.2	76.9	42	0	1	1	2	0	2	13.06.2014	0	0	1
378	27480	C	C_F	1	47	167	745.8	76	42	0	1	1	2	0	2	20.06.2014	0	0	1
379	9656	C	C_F	1	22	NaN	621	63.3	NaN	1	1	0	2	0	1	18.05.2009	0	0	1
379	9725	C	C_F	1	22	NaN	624.9	63.7	NaN	1	1	0	2	0	2	26.05.2009	0	0	1
379	9796	C	C_F	1	22	NaN	626.1	63.8	NaN	1	1	0	2	0	2	02.06.2009	0	0	1
379	9898	C	C_F	1	22	NaN	628	64	NaN	1	1	0	2	0	2	09.06.2009	0	0	1
379	9985	C	C_F	1	22	NaN	625.8	63.8	NaN	1	1	0	2	0	2	17.06.2009	0	0	1
380	2178	C	C_F	1	48	NaN	981.8	100.1	NaN	0	2	0	2	0	1	26.06.2007	1	0	0
380	2259	C	C_F	1	48	NaN	981.2	100	NaN	0	2	0	2	0	2	03.07.2007	1	0	0
381	13157	C	C_F	0	39	NaN	872.1	88.9	NaN	0	1	0	2	0	1	12.05.2010	0	0	1
381	13231	C	C_F	0	39	NaN	861.4	87.8	NaN	0	1	1	2	0	2	20.05.2010	0	0	1
381	13232	C	C_F	0	39	NaN	860.6	87.7	NaN	0	1	0	2	0	2	20.05.2010	0	0	1
381	13293	C	C_F	0	39	NaN	867.5	88.4	NaN	0	1	1	2	0	2	27.05.2010	0	0	1
381	13319	C	C_F	0	39	NaN	874.9	89.2	NaN	0	1	1	2	0	2	01.06.2010	0	0	1
381	13377	C	C_F	0	39	NaN	863.8	88.1	NaN	0	1	1	2	0	2	08.06.2010	0	0	1
381	13465	C	C_F	0	39	NaN	867.9	88.5	NaN	0	1	1	2	0	2	15.06.2010	0	0	1
381	13565	C	C_F	0	39	NaN	850.5	86.7	NaN	0	1	1	2	0	2	22.06.2010	0	0	1
382	16664	C	C_F	0	27	NaN	538.2	54.9	NaN	1	0	0	2	0	1	27.05.2011	1	0	0
382	16703	C	C_F	0	27	NaN	549.6	56	NaN	1	1	0	2	0	2	03.06.2011	1	0	0
382	16763	C	C_F	0	27	NaN	558.2	56.9	NaN	1	1	0	2	0	2	10.06.2011	1	0	0
382	16807	C	C_F	0	27	NaN	553.2	56.4	NaN	1	1	0	2	0	2	17.06.2011	1	0	0
383	23681	C	C_F	0	47	NaN	753.3	76.8	NaN	1	1	0	2	0	1	24.05.2013	1	1	0
383	23728	C	C_F	0	47	NaN	744.5	75.9	NaN	1	1	0	2	0	2	31.05.2013	1	0	0
383	23801	C	C_F	0	47	NaN	748.5	76.3	NaN	1	1	0	2	0	2	07.06.2013	1	0	0
384	13213	C	C_F	1	44	NaN	898.6	91.6	NaN	1	1	0	2	0	2	19.05.2010	1	0	0
384	13359	C	C_F	1	44	NaN	898.7	91.6	NaN	1	2	0	2	0	2	04.06.2010	1	0	0
384	13431	C	C_F	1	44	NaN	907.7	92.5	NaN	1	2	0	2	0	2	11.06.2010	1	0	0
384	13539	C	C_F	1	44	NaN	920.2	93.8	NaN	1	2	0	2	0	2	18.06.2010	1	0	0
385	31651	C	C_F	1	47	170	702.6	71.6	40	1	1	1	2	0	2	02.07.2015	1	0	0
385	31935	C	C_F	1	47	170	698.6	71.2	40	1	2	0	2	0	2	29.07.2015	1	0	0
385	31981	C	C_F	1	47	170	698	71.2	40	1	1	NaN	2	0	2	04.08.2015	1	0	0
386	23798	C	C_F	1	61	175	935.7	95.4	43	1	2	0	2	0	1	06.06.2013	1	0	0
386	23876	C	C_F	1	61	175	931.4	94.9	43	1	2	0	2	0	2	13.06.2013	1	0	0
386	24032	C	C_F	1	61	175	924.2	94.2	43	1	1	NaN	2	0	2	27.06.2013	1	0	0
386	24108	C	C_F	1	61	175	927.3	94.5	43	1	2	0	2	0	2	04.07.2013	1	0	0
387	27265	C	C_F	1	53	175	827.5	84.4	43	0	1	0	2	0	1	02.06.2014	1	1	0
387	27367	C	C_F	1	53	175	827.1	84.3	43	0	1	1	2	0	2	10.06.2014	1	0	0
387	27424	C	C_F	1	53	175	817.8	83.4	43	0	1	1	2	0	2	16.06.2014	1	0	0
387	27555	C	C_F	1	53	175	811.7	82.7	43	0	1	1	2	0	2	26.06.2014	1	0	0
387	27627	C	C_F	1	53	175	809.7	82.5	43	0	1	1	2	0	2	02.07.2014	1	0	0
388	9921	C	C_F	1	50	NaN	921.6	93.9	NaN	0	1	0	2	0	1	10.06.2009	1	1	0
388	9984	C	C_F	1	50	NaN	922.7	94.1	NaN	0	1	0	2	0	2	17.06.2009	1	0	0
388	10050	C	C_F	1	50	NaN	923.3	94.1	NaN	0	1	0	2	0	2	24.06.2009	1	0	0
388	10128	C	C_F	1	50	NaN	914.8	93.3	NaN	0	1	0	2	0	2	01.07.2009	1	0	0
388	10220	C	C_F	1	50	NaN	908.9	92.7	NaN	0	1	0	2	0	2	08.07.2009	1	0	0
388	13810	C	C_F	1	51	NaN	931.7	95	NaN	0	2	0	2	1	3	14.07.2010	1	0	0
389	16662	C	C_F	1	32	NaN	875.5	89.2	NaN	1	1	0	2	0	1	27.05.2011	1	1	0
389	16708	C	C_F	1	32	NaN	872.6	89	NaN	1	1	0	2	0	2	03.06.2011	1	0	0
389	16769	C	C_F	1	32	NaN	855.1	87.2	NaN	1	1	0	2	0	2	10.06.2011	1	0	0
389	16812	C	C_F	1	32	NaN	854.2	87.1	NaN	1	1	0	2	0	2	17.06.2011	1	0	0
390	9894	C	C_F	0	42	NaN	628.1	64	NaN	1	0	0	2	0	1	09.06.2009	1	0	0
390	10038	C	C_F	0	42	NaN	623.2	63.5	NaN	1	0	0	2	0	2	23.06.2009	1	0	0
390	10111	C	C_F	0	42	NaN	634.2	64.6	NaN	1	1	0	2	0	2	30.06.2009	1	0	0
391	23803	C	C_F	1	17	177	604.7	61.6	43	0	1	NaN	2	0	1	07.06.2013	1	0	0
391	23880	C	C_F	1	17	177	618	63	43	0	1	NaN	2	0	2	14.06.2013	1	0	0
391	23959	C	C_F	1	17	177	619.9	63.2	43	0	1	NaN	2	0	2	21.06.2013	1	0	0
392	20219	C	C_F	1	49	175	873.4	89	42	2	1	0	2	0	2	11.06.2012	1	0	0
392	20304	C	C_F	1	49	175	869.5	88.6	42	2	1	0	2	0	2	18.06.2012	1	0	0
392	20386	C	C_F	1	49	175	866.4	88.3	42	2	1	1	2	0	2	26.06.2012	1	0	0
392	20387	C	C_F	1	49	175	865.6	88.2	42	2	1	0	2	0	2	26.06.2012	1	0	0
392	20464	C	C_F	1	49	175	853.2	87	42	2	1	1	2	0	2	03.07.2012	1	0	0
393	31567	C	C_F	1	35	176	740.1	75.4	44	1	1	0	2	0	1	23.06.2015	1	1	0
393	31666	C	C_F	1	35	176	745.3	76	44	1	1	0	2	0	2	03.07.2015	1	0	0
393	31700	C	C_F	1	35	176	751	76.6	44	1	1	0	2	0	2	08.07.2015	1	0	0
393	31758	C	C_F	1	35	176	760.6	77.5	44	1	1	0	2	0	2	14.07.2015	1	0	0
393	31889	C	C_F	1	35	176	741	75.5	44	1	1	0	2	0	2	24.07.2015	1	0	0
393	31897	C	C_F	1	35	176	740.9	75.5	44	1	1	0	2	0	2	27.07.2015	1	0	0
393	32020	C	C_F	1	35	176	732.1	74.6	44	1	1	0	2	0	2	06.08.2015	1	0	0
394	24182	C	C_F	0	43	168	650.7	66.3	39	1	1	0	2	0	1	12.07.2013	1	1	0
394	24246	C	C_F	0	43	168	650.4	66.3	39	1	1	0	2	0	2	19.07.2013	1	0	0
394	24327	C	C_F	0	43	168	655.5	66.8	39	1	1	0	2	0	2	26.07.2013	1	0	0
394	24410	C	C_F	0	43	168	657.9	67.1	39	1	1	0	2	0	2	02.08.2013	1	0	0
394	24479	C	C_F	0	43	168	649	66.2	39	1	1	0	2	0	2	09.08.2013	1	0	0
394	24531	C	C_F	0	43	168	658.3	67.1	39	1	1	0	2	0	2	16.08.2013	1	0	0
395	20104	C	C_F	1	48	177	940.8	95.9	44	0	1	0	2	0	1	29.05.2012	1	1	0
395	20180	C	C_F	1	48	177	935.3	95.3	44	0	1	0	2	0	2	05.06.2012	1	0	0
395	20295	C	C_F	1	48	177	935.3	95.3	44	0	1	0	2	0	2	15.06.2012	1	0	0
395	20366	C	C_F	1	48	177	935.9	95.4	44	0	1	0	2	0	2	22.06.2012	1	0	0
395	20367	C	C_F	1	48	177	935.8	95.4	44	0	1	1	2	0	2	22.06.2012	1	0	0
395	20437	C	C_F	1	48	177	943.6	96.2	44	0	1	1	2	0	2	29.06.2012	1	0	0
395	20523	C	C_F	1	48	177	942.3	96.1	44	0	1	1	2	0	2	06.07.2012	1	0	0
395	20539	C	C_F	1	48	177	945	96.3	44	0	2	0	2	0	2	09.07.2012	1	0	0
395	20693	C	C_F	1	48	177	955.2	97.4	44	0	2	0	2	0	2	23.07.2012	1	0	0
395	20753	C	C_F	1	48	177	954.6	97.3	44	0	1	NaN	2	0	2	30.07.2012	1	0	0
395	20874	C	C_F	1	48	177	942.8	96.1	44	0	1	NaN	2	0	2	08.08.2012	1	0	0
396	27602	C	C_F	1	45	195	1115.4	113.7	46	0	1	0	2	0	1	01.07.2014	1	1	0
396	27830	C	C_F	1	45	195	1093.4	111.5	46	0	1	0	2	0	2	18.07.2014	1	0	0
396	27862	C	C_F	1	45	195	1101.7	112.3	46	0	1	0	2	0	2	22.07.2014	1	0	0
396	27959	C	C_F	1	45	195	1087.1	110.8	46	0	1	0	2	0	2	29.07.2014	1	0	0
396	28037	C	C_F	1	45	195	1078.4	109.9	46	0	1	0	2	0	2	05.08.2014	1	0	0
397	5899	C	C_F	1	50	NaN	950.7	96.9	NaN	0	0	0	2	0	1	19.05.2008	1	0	0
397	5957	C	C_F	1	50	NaN	949.5	96.8	NaN	0	1	0	2	0	2	26.05.2008	1	0	0
397	6034	C	C_F	1	50	NaN	947.9	96.6	NaN	0	1	1	2	0	2	02.06.2008	1	0	0
397	6117	C	C_F	1	50	NaN	943.1	96.1	NaN	0	1	1	2	0	2	09.06.2008	1	0	0
398	1928	C	C_F	1	44	NaN	841.4	85.8	NaN	1	1	0	2	0	1	01.06.2007	0	0	1
398	2010	C	C_F	1	44	NaN	848.5	86.5	NaN	1	1	0	2	0	2	12.06.2007	0	0	1
398	2096	C	C_F	1	44	NaN	848.3	86.5	NaN	1	1	0	2	0	2	19.06.2007	0	0	1
398	2167	C	C_F	1	44	NaN	844.7	86.1	NaN	1	1	1	2	0	2	26.06.2007	0	0	1
399	15899	C	C_F	1	54	NaN	754.1	76.9	NaN	1	2	0	2	2	3	04.03.2011	1	0	0
399	12791	C	C_F	1	53	NaN	714	72.8	NaN	1	2	0	2	1	3	02.04.2010	1	0	0
399	12848	C	C_F	1	53	NaN	719.4	73.3	NaN	1	2	0	2	1	2	09.04.2010	1	0	0
399	12880	C	C_F	1	53	NaN	718.8	73.3	NaN	1	2	0	2	1	2	14.04.2010	1	0	0
399	11615	C	C_F	1	53	NaN	711	72.5	NaN	1	1	0	2	0	1	26.11.2009	1	1	0
399	11816	C	C_F	1	53	NaN	714.8	72.9	NaN	1	2	0	2	0	2	17.12.2009	1	0	0
400	2141	C	C_F	0	55	NaN	800	81.5	NaN	1	1	0	2	0	1	22.06.2007	0	0	1
400	2217	C	C_F	0	55	NaN	790.8	80.6	NaN	1	1	0	2	0	2	29.06.2007	0	0	1
400	2292	C	C_F	0	55	NaN	793.8	80.9	NaN	1	1	NaN	2	0	2	06.07.2007	0	0	1
400	2399	C	C_F	0	55	NaN	794.8	81	NaN	1	1	0	2	0	2	13.07.2007	0	0	1
401	23982	C	C_F	1	33	190	1037.1	105.7	46	1	1	0	2	0	1	25.06.2013	0	0	1
402	28573	C	C_F	1	58	182	811.9	82.8	43	0	1	NaN	2	1	2	24.09.2014	1	0	0
402	28688	C	C_F	1	58	182	803.2	81.9	43	0	1	NaN	2	1	2	02.10.2014	1	0	0
402	28762	C	C_F	1	58	182	809.4	82.5	43	0	1	NaN	2	1	2	08.10.2014	1	0	0
402	28787	C	C_F	1	58	182	819.1	83.5	43	0	1	NaN	2	1	2	13.10.2014	1	0	0
403	24021	C	C_F	1	57	NaN	838.3	85.5	NaN	1	1	0	2	0	1	27.06.2013	0	0	1
403	24097	C	C_F	1	57	NaN	836.6	85.3	NaN	1	1	0	2	0	2	04.07.2013	0	0	1
403	24171	C	C_F	1	57	NaN	843.7	86	NaN	1	1	0	2	0	2	11.07.2013	0	0	1
404	24026	C	C_F	1	44	180	803.4	81.9	43	1	1	0	2	0	1	27.06.2013	0	0	1
404	24089	C	C_F	1	44	180	792.8	80.8	43	1	1	0	2	0	2	03.07.2013	0	0	1
404	24154	C	C_F	1	44	180	797.7	81.3	43	1	1	1	2	0	2	10.07.2013	0	0	1
404	24155	C	C_F	1	44	180	795.3	81.1	43	1	1	0	2	0	2	10.07.2013	0	0	1
404	24219	C	C_F	1	44	180	793.9	80.9	43	1	1	1	2	0	2	17.07.2013	0	0	1
404	24289	C	C_F	1	44	180	806.2	82.2	43	1	1	1	2	0	2	24.07.2013	0	0	1
404	24380	C	C_F	1	44	180	803.8	81.9	43	1	1	1	2	0	2	31.07.2013	0	0	1
405	31793	C	C_F	1	51	176	1000.8	102	44	0	1	1	2	0	1	16.07.2015	1	0	0
405	31794	C	C_F	1	51	176	1000.1	101.9	44	0	1	0	2	0	1	16.07.2015	1	1	0
405	31864	C	C_F	1	51	176	1002.7	102.2	44	0	1	1	2	0	2	22.07.2015	1	0	0
405	31979	C	C_F	1	51	176	996.1	101.5	44	0	1	1	2	0	2	03.08.2015	1	0	0
406	10081	C	C_F	1	45	NaN	1012.5	103.2	NaN	1	1	0	2	0	1	26.06.2009	0	0	1
406	10173	C	C_F	1	45	NaN	1012.8	103.2	NaN	1	1	0	2	0	2	03.07.2009	0	0	1
407	24255	C	C_F	1	58	184	1183.1	120.6	43	0	2	0	2	0	1	22.07.2013	1	0	0
407	24349	C	C_F	1	58	184	1162.8	118.5	43	0	2	0	2	0	2	29.07.2013	1	0	0
407	24501	C	C_F	1	58	184	1178	120.1	43	0	2	0	2	0	2	12.08.2013	1	0	0
408	27860	C	C_F	1	42	182	874.4	89.1	42	0	1	1	2	0	1	22.07.2014	1	0	0
408	27861	C	C_F	1	42	182	873.4	89	42	0	1	0	2	0	1	22.07.2014	1	1	0
408	28245	C	C_F	1	42	182	852.1	86.9	42	0	1	1	2	0	2	25.08.2014	1	0	0
408	28302	C	C_F	1	42	182	859.1	87.6	42	0	1	1	2	0	2	01.09.2014	1	0	0
408	28374	C	C_F	1	42	182	857.7	87.4	42	0	1	1	2	0	2	08.09.2014	1	0	0
408	28452	C	C_F	1	42	182	858.2	87.5	42	0	1	1	2	0	2	15.09.2014	1	0	0
409	32076	C	C_F	1	47	175	883.4	90.1	44	0	2	0	2	0	1	12.08.2015	1	0	0
409	32124	C	C_F	1	47	175	883.3	90	44	0	1	1	2	0	2	18.08.2015	1	0	0
409	32197	C	C_F	1	47	175	888.4	90.6	44	0	2	0	2	0	2	25.08.2015	1	0	0
409	32249	C	C_F	1	47	175	890.5	90.8	44	0	2	0	2	0	2	31.08.2015	1	0	0
409	32672	C	C_F	1	47	175	922.4	94	44	0	2	0	2	1	3	16.10.2015	1	0	0
409	32736	C	C_F	1	47	175	906.5	92.4	44	0	2	0	2	1	2	22.10.2015	1	0	0
409	32791	C	C_F	1	47	175	901.1	91.9	44	0	2	0	2	1	2	29.10.2015	1	0	0
409	32848	C	C_F	1	47	175	906.1	92.4	44	0	2	0	2	1	2	04.11.2015	1	0	0
409	32941	C	C_F	1	47	175	911.1	92.9	44	0	2	0	2	1	2	11.11.2015	1	0	0
409	33021	C	C_F	1	47	175	898.5	91.6	44	0	2	0	2	1	2	17.11.2015	1	0	0
409	33073	C	C_F	1	47	175	887.4	90.5	44	0	2	0	2	1	2	23.11.2015	1	0	0
410	2176	C	C_F	1	45	NaN	550.2	56.1	NaN	2	1	NaN	2	0	1	26.06.2007	1	0	0
410	2230	C	C_F	1	45	NaN	558.1	56.9	NaN	2	1	NaN	2	0	2	02.07.2007	1	0	0
410	3487	C	C_F	1	45	NaN	564.4	57.5	NaN	2	2	0	2	1	2	22.10.2007	1	0	0
410	3562	C	C_F	1	45	NaN	564.2	57.5	NaN	2	2	0	2	1	2	29.10.2007	1	0	0
411	10607	C	C_F	1	43	NaN	716.2	73	NaN	0	1	NaN	2	0	1	11.08.2009	1	0	0
411	10687	C	C_F	1	43	NaN	710.5	72.4	NaN	0	1	NaN	2	0	2	18.08.2009	1	0	0
412	14107	C	C_F	1	44	NaN	914.8	93.3	NaN	0	1	1	2	0	1	11.08.2010	1	0	0
412	14178	C	C_F	1	44	NaN	917.8	93.6	NaN	0	1	1	2	0	2	18.08.2010	1	0	0
413	24043	C	C_F	1	32	174	565.9	57.7	40	0	1	0	2	0	1	28.06.2013	1	1	0
413	24116	C	C_F	1	32	174	563.1	57.4	40	0	1	0	2	0	2	05.07.2013	1	0	0
413	24188	C	C_F	1	32	174	564.9	57.6	40	0	1	0	2	0	2	12.07.2013	1	0	0
413	24249	C	C_F	1	32	174	567.4	57.8	40	0	1	1	2	0	2	19.07.2013	1	0	0
413	24250	C	C_F	1	32	174	565.4	57.6	40	0	1	0	2	0	2	12.07.2013	1	0	0
413	24332	C	C_F	1	32	174	566.3	57.7	40	0	1	1	2	0	2	26.07.2013	1	0	0
413	24483	C	C_F	1	32	174	572.7	58.4	40	0	1	1	2	0	2	09.08.2013	1	0	0
413	24572	C	C_F	1	32	174	576.3	58.7	40	0	1	1	2	0	2	21.08.2013	1	0	0
413	24650	C	C_F	1	32	174	581.7	59.3	40	0	1	1	2	0	2	29.08.2013	1	0	0
414	2423	C	C_F	1	42	NaN	789.6	80.5	NaN	2	1	NaN	2	0	1	16.07.2007	1	0	0
414	2491	C	C_F	1	42	NaN	815.1	83.1	NaN	2	2	0	2	0	2	23.07.2007	1	0	0
414	2634	C	C_F	1	42	NaN	815.5	83.1	NaN	2	2	0	2	0	2	06.08.2007	1	0	0
414	2702	C	C_F	1	42	NaN	802.7	81.8	NaN	2	1	NaN	2	0	2	13.08.2007	1	0	0
414	2766	C	C_F	1	42	NaN	802.2	81.8	NaN	2	1	NaN	2	0	2	21.08.2007	1	0	0
415	17131	C	C_F	1	17	NaN	765.4	78	NaN	1	1	0	2	0	2	28.07.2011	1	0	0
416	16926	C	C_F	1	57	NaN	673.6	68.7	NaN	1	1	0	2	0	1	06.07.2011	1	1	0
416	16990	C	C_F	1	57	NaN	670.5	68.3	NaN	1	1	0	2	0	2	13.07.2011	1	0	0
416	17051	C	C_F	1	57	NaN	669.3	68.2	NaN	1	1	0	2	0	2	20.07.2011	1	0	0
416	17119	C	C_F	1	57	NaN	671.7	68.5	NaN	1	1	0	2	0	2	27.07.2011	1	0	0
416	17191	C	C_F	1	57	NaN	672.9	68.6	NaN	1	1	0	2	0	2	03.08.2011	1	0	0
416	17249	C	C_F	1	57	NaN	677	69	NaN	1	1	0	2	0	2	10.08.2011	1	0	0
417	2149	C	C_F	1	47	NaN	737.6	75.2	NaN	0	0	0	2	0	1	25.06.2007	1	0	0
417	2310	C	C_F	1	47	NaN	731.7	74.6	NaN	0	1	0	2	0	2	09.07.2007	1	0	0
417	2413	C	C_F	1	47	NaN	737.4	75.2	NaN	0	1	NaN	2	0	2	16.07.2007	1	0	0
418	27696	C	C_F	1	21	178	588.2	60	40	1	1	0	2	0	1	08.07.2014	0	0	1
418	27790	C	C_F	1	21	178	592	60.3	40	1	1	0	2	0	2	16.07.2014	0	0	1
418	27948	C	C_F	1	21	178	588.7	60	40	1	1	0	2	0	2	28.07.2014	0	0	1
418	28043	C	C_F	1	21	178	592.7	60.4	40	1	1	0	2	0	2	05.08.2014	0	0	1
418	28125	C	C_F	1	21	178	594.8	60.6	40	1	1	0	2	0	2	12.08.2014	0	0	1
419	13722	C	C_F	1	55	NaN	1137.2	115.9	NaN	0	1	NaN	2	0	1	07.07.2010	1	0	0
419	13878	C	C_F	1	55	NaN	1134.2	115.6	NaN	0	1	NaN	2	0	2	21.07.2010	1	0	0
419	13953	C	C_F	1	55	NaN	1139.8	116.2	NaN	0	1	NaN	2	0	2	28.07.2010	1	0	0
420	17150	C	C_F	1	35	NaN	780.8	79.6	NaN	1	2	0	2	0	2	29.07.2011	1	0	0
421	20403	C	C_F	1	54	176	843.9	86	44	0	1	0	2	0	1	27.06.2012	1	1	0
421	20479	C	C_F	1	54	176	848.1	86.5	44	0	1	1	2	0	2	04.07.2012	1	0	0
421	20480	C	C_F	1	54	176	846.5	86.3	44	0	1	0	2	0	2	04.07.2012	1	0	0
421	20562	C	C_F	1	54	176	838.2	85.4	44	0	1	1	2	0	2	11.07.2012	1	0	0
421	20649	C	C_F	1	54	176	846.5	86.3	44	0	1	1	2	0	2	18.07.2012	1	0	0
422	16916	C	C_F	1	55	NaN	733.4	74.8	NaN	0	1	0	2	0	1	05.07.2011	1	1	0
422	16968	C	C_F	1	55	NaN	736.7	75.1	NaN	0	1	0	2	0	2	11.07.2011	1	0	0
422	17026	C	C_F	1	55	NaN	738.4	75.3	NaN	0	1	0	2	0	2	18.07.2011	1	0	0
422	17095	C	C_F	1	55	NaN	733.5	74.8	NaN	0	1	0	2	0	2	25.07.2011	1	0	0
422	17160	C	C_F	1	55	NaN	723.3	73.7	NaN	0	1	0	2	0	2	01.08.2011	1	0	0
423	32381	C	C_F	1	42	180	890.7	90.8	45	1	2	0	2	0	1	14.09.2015	1	0	0
424	6224	C	C_F	1	47	NaN	1053	107.3	NaN	1	1	0	2	0	1	19.06.2008	1	1	0
424	6288	C	C_F	1	47	NaN	1060.6	108.1	NaN	1	2	0	2	0	2	26.06.2008	1	0	0
424	6367	C	C_F	1	47	NaN	1057.8	107.8	NaN	1	2	0	2	0	2	03.07.2008	1	0	0
424	6444	C	C_F	1	47	NaN	1059	108	NaN	1	1	0	2	0	2	10.07.2008	1	0	0
424	6522	C	C_F	1	47	NaN	1047.8	106.8	NaN	1	2	0	2	0	2	17.07.2008	1	0	0
425	2450	C	C_F	1	50	NaN	1179.9	120.3	NaN	1	1	1	2	0	2	18.07.2007	1	0	0
425	2451	C	C_F	1	50	NaN	1175.4	119.8	NaN	1	1	0	2	0	2	18.07.2007	1	0	0
425	2520	C	C_F	1	50	NaN	1175.3	119.8	NaN	1	1	NaN	2	0	2	25.07.2007	1	0	0
425	2560	C	C_F	1	50	NaN	1179.3	120.2	NaN	1	1	NaN	2	0	2	30.07.2007	1	0	0
425	2631	C	C_F	1	50	NaN	1173.6	119.6	NaN	1	1	NaN	2	0	2	06.08.2007	1	0	0
425	2700	C	C_F	1	50	NaN	1161.6	118.4	NaN	1	1	NaN	2	0	2	13.08.2007	1	0	0
426	20561	C	C_F	1	36	186	785.5	80.1	44	2	1	0	2	0	1	11.07.2012	1	1	0
426	20684	C	C_F	1	36	186	771.6	78.7	44	2	1	0	2	0	2	20.07.2012	1	0	0
426	20739	C	C_F	1	36	186	767.1	78.2	44	2	1	0	2	0	2	27.07.2012	1	0	0
426	20814	C	C_F	1	36	186	759.1	77.4	44	2	1	0	2	0	2	03.08.2012	1	0	0
426	20902	C	C_F	1	36	186	756.7	77.1	44	2	1	1	2	0	2	10.08.2012	1	0	0
426	20903	C	C_F	1	36	186	754.5	76.9	44	2	1	0	2	0	2	10.08.2012	1	0	0
427	10263	C	C_F	1	50	NaN	689.3	70.3	NaN	0	1	0	2	0	1	10.07.2009	1	1	0
427	10418	C	C_F	1	50	NaN	688	70.1	NaN	0	1	0	2	0	2	24.07.2009	1	0	0
427	10496	C	C_F	1	50	NaN	685.2	69.8	NaN	0	1	0	2	0	2	31.07.2009	1	0	0
427	10578	C	C_F	1	50	NaN	690.3	70.4	NaN	0	1	0	2	0	2	07.08.2009	1	0	0
428	24323	C	C_F	1	42	186	656.2	66.9	43	0	1	0	2	0	1	25.07.2013	1	1	0
428	24407	C	C_F	1	42	186	650.8	66.3	43	0	1	1	2	0	2	01.08.2013	1	0	0
428	24408	C	C_F	1	42	186	651.3	66.4	43	0	1	0	2	0	2	01.08.2013	1	0	0
428	24476	C	C_F	1	42	186	650.4	66.3	43	0	1	1	2	0	2	08.08.2013	1	0	0
428	24594	C	C_F	1	42	186	653.6	66.6	43	0	1	1	2	0	2	22.08.2013	1	0	0
429	20487	C	C_F	0	59	172	719.1	73.3	39	1	1	0	2	0	1	04.07.2012	0	0	1
429	20631	C	C_F	0	59	172	717.5	73.1	39	1	1	NaN	2	0	2	17.07.2012	0	0	1
429	20709	C	C_F	0	59	172	711.9	72.6	39	1	1	NaN	2	0	2	24.07.2012	0	0	1
429	20773	C	C_F	0	59	172	711.4	72.5	39	1	1	NaN	2	0	2	31.07.2012	0	0	1
430	24174	C	C_F	0	31	172	924.7	94.3	42	2	1	0	2	0	1	11.07.2013	0	0	1
430	24234	C	C_F	0	31	172	918.9	93.7	42	2	1	1	2	0	2	18.07.2013	0	0	1
430	24235	C	C_F	0	31	172	918.1	93.6	42	2	1	0	2	0	2	18.07.2013	0	0	1
430	24308	C	C_F	0	31	172	924.6	94.3	42	2	1	1	2	0	2	25.07.2013	0	0	1
430	24451	C	C_F	0	31	172	923.6	94.1	42	2	1	1	2	0	2	07.08.2013	0	0	1
430	24518	C	C_F	0	31	172	935.4	95.4	42	2	1	1	2	0	2	14.08.2013	0	0	1
430	24569	C	C_F	0	31	172	948.5	96.7	42	2	1	1	2	0	2	21.08.2013	0	0	1
431	17291	C	C_F	1	23	NaN	839.4	85.6	NaN	2	1	NaN	2	0	1	17.08.2011	1	0	0
431	17360	C	C_F	1	23	NaN	842.2	85.9	NaN	2	1	NaN	2	0	2	24.08.2011	1	0	0
431	17403	C	C_F	1	23	NaN	839.1	85.5	NaN	2	2	0	2	0	2	26.08.2011	1	0	0
431	17441	C	C_F	1	23	NaN	839	85.5	NaN	2	1	NaN	2	0	2	31.08.2011	1	0	0
431	17499	C	C_F	1	23	NaN	827.6	84.4	NaN	2	2	0	2	0	2	07.09.2011	1	0	0
431	17558	C	C_F	1	23	NaN	821.7	83.8	NaN	2	2	0	2	0	2	14.09.2011	1	0	0
431	17609	C	C_F	1	23	NaN	818.4	83.4	NaN	2	2	0	2	0	2	21.09.2011	1	0	0
431	17610	C	C_F	1	23	NaN	814.4	83	NaN	2	1	0	2	0	2	21.09.2011	1	0	0
431	17666	C	C_F	1	23	NaN	813.8	83	NaN	2	1	0	2	0	2	28.09.2011	1	0	0
432	10907	C	C_F	1	44	NaN	883.8	90.1	NaN	0	1	0	2	0	1	11.09.2009	1	1	0
432	10979	C	C_F	1	44	NaN	882.4	89.9	NaN	0	1	0	2	0	2	18.09.2009	1	0	0
433	20530	C	C_F	0	33	176	597	60.9	39	0	1	0	2	0	1	06.07.2012	0	0	1
433	20606	C	C_F	0	33	176	622.3	63.4	39	0	1	0	2	0	2	13.07.2012	0	0	1
433	20682	C	C_F	0	33	176	623	63.5	39	0	1	0	2	0	2	20.07.2012	0	0	1
433	20683	C	C_F	0	33	176	622.6	63.5	39	0	1	1	2	0	2	20.07.2012	0	0	1
433	20748	C	C_F	0	33	176	629	64.1	39	0	1	1	2	0	2	27.07.2012	0	0	1
434	24200	C	C_F	0	50	170	796.4	81.2	38	1	1	0	2	0	1	15.07.2013	1	1	0
434	24260	C	C_F	0	50	170	799.9	81.5	38	1	1	0	2	0	2	22.07.2013	1	0	0
434	24347	C	C_F	0	50	170	804.4	82	38	1	1	1	2	0	2	29.07.2013	1	0	0
434	24348	C	C_F	0	50	170	803.3	81.9	38	1	1	0	2	0	2	29.07.2013	1	0	0
434	24430	C	C_F	0	50	170	805	82.1	38	1	1	1	2	0	2	05.08.2013	1	0	0
434	24500	C	C_F	0	50	170	802.1	81.8	38	1	1	1	2	0	2	12.08.2013	1	0	0
435	3169	C	C_F	1	33	NaN	741.2	75.6	NaN	1	1	0	2	1	3	26.09.2007	1	0	0
435	3376	C	C_F	1	33	NaN	736.8	75.1	NaN	1	1	0	2	1	2	10.10.2007	1	0	0
435	3535	C	C_F	1	33	NaN	740.8	75.5	NaN	1	1	NaN	2	1	2	24.10.2007	1	0	0
436	10274	C	C_F	1	45	NaN	895.7	91.3	NaN	0	1	0	2	0	1	13.07.2009	1	1	0
436	10351	C	C_F	1	45	NaN	892.6	91	NaN	0	1	0	2	0	2	20.07.2009	1	0	0
436	10522	C	C_F	1	45	NaN	884.4	90.2	NaN	0	1	0	2	0	2	04.08.2009	1	0	0
436	10599	C	C_F	1	45	NaN	894.3	91.2	NaN	0	1	NaN	2	0	2	11.08.2009	1	0	0
436	10679	C	C_F	1	45	NaN	892.8	91	NaN	0	1	NaN	2	0	2	18.08.2009	1	0	0
437	24310	C	C_F	1	48	184	997.2	101.7	46	0	1	NaN	2	0	2	25.07.2013	1	0	0
437	24396	C	C_F	1	48	184	1001.6	102.1	46	0	1	1	2	0	2	01.08.2013	1	0	0
437	24397	C	C_F	1	48	184	999	101.8	46	0	1	0	2	0	2	01.08.2013	1	0	0
437	24471	C	C_F	1	48	184	1000.1	101.9	46	0	1	1	2	0	2	08.08.2013	1	0	0
439	6351	C	C_F	0	32	NaN	545.2	55.6	NaN	2	1	NaN	2	0	1	02.07.2008	1	0	0
439	6537	C	C_F	0	32	NaN	542.5	55.3	NaN	2	2	0	2	0	2	18.07.2008	1	0	0
440	28080	C	C_F	1	56	178	782.8	79.8	44	0	1	0	2	0	2	07.08.2014	1	0	0
440	28202	C	C_F	1	56	178	779	79.4	44	0	1	0	2	0	2	20.08.2014	1	0	0
440	28254	C	C_F	1	56	178	779.8	79.5	44	0	1	1	2	0	2	26.08.2014	1	0	0
440	28255	C	C_F	1	56	178	778.6	79.4	44	0	1	0	2	0	2	26.08.2014	1	0	0
440	28326	C	C_F	1	56	178	778.8	79.4	44	0	1	1	2	0	2	02.09.2014	1	0	0
440	28396	C	C_F	1	56	178	779.5	79.5	44	0	1	1	2	0	2	09.09.2014	1	0	0
440	28499	C	C_F	1	56	178	779.9	79.5	44	0	1	1	2	0	2	17.09.2014	1	0	0
440	28620	C	C_F	1	56	178	770.8	78.6	44	0	1	1	2	0	2	26.09.2014	1	0	0
441	2561	C	C_F	1	45	NaN	837.6	85.4	NaN	0	1	1	2	0	1	30.07.2007	1	0	0
441	2562	C	C_F	1	45	NaN	840.5	85.7	NaN	0	1	0	2	0	1	30.07.2007	1	1	0
441	2866	C	C_F	1	45	NaN	820.3	83.6	NaN	0	1	1	2	0	2	03.09.2007	1	0	0
441	2949	C	C_F	1	45	NaN	840.5	85.7	NaN	0	1	1	2	0	2	10.09.2007	1	0	0
442	6511	C	C_F	0	31	NaN	809	82.5	NaN	0	1	0	2	0	1	16.07.2008	1	1	0
442	6675	C	C_F	0	31	NaN	811.5	82.7	NaN	0	1	0	2	0	2	30.07.2008	1	0	0
443	28070	C	C_F	1	60	181	839.2	85.5	45	0	1	0	2	0	1	07.08.2014	0	0	1
443	28134	C	C_F	1	60	181	843.6	86	45	0	1	0	2	0	2	13.08.2014	0	0	1
444	32164	C	C_F	1	60	178	913.7	93.1	42	1	1	0	2	0	1	21.08.2015	1	1	0
444	32272	C	C_F	1	60	178	932.6	95.1	42	1	1	0	2	0	2	02.09.2015	1	0	0
444	32329	C	C_F	1	60	178	936.2	95.4	42	1	1	0	2	0	2	08.09.2015	1	0	0
445	15391	C	C_F	1	38	NaN	844.8	86.1	NaN	2	1	NaN	2	0	1	10.01.2011	1	0	0
445	15535	C	C_F	1	38	NaN	852.7	86.9	NaN	2	1	NaN	2	0	2	24.01.2011	1	0	0
446	12188	C	C_F	1	44	NaN	831.4	84.8	NaN	2	2	0	2	1	3	05.02.2010	1	0	0
446	12245	C	C_F	1	44	NaN	836.5	85.3	NaN	2	2	0	2	1	2	11.02.2010	1	0	0
446	6592	C	C_F	1	42	NaN	803.8	81.9	NaN	2	1	1	2	0	1	23.07.2008	1	0	0
446	6680	C	C_F	1	42	NaN	795.6	81.1	NaN	2	1	NaN	2	0	2	30.07.2008	1	0	0
446	6826	C	C_F	1	42	NaN	797.3	81.3	NaN	2	1	1	2	0	2	13.08.2008	1	0	0
447	24584	C	C_F	1	21	179	606.5	61.8	42	0	1	0	2	0	1	22.08.2013	1	1	0
447	24641	C	C_F	1	21	179	619.2	63.1	42	0	1	0	2	0	2	28.08.2013	1	0	0
447	24788	C	C_F	1	21	179	604.3	61.6	42	0	1	NaN	2	0	2	12.09.2013	1	0	0
448	20695	C	C_F	1	41	192	621.3	63.3	45	2	1	0	2	0	1	23.07.2012	1	1	0
448	20762	C	C_F	1	41	192	622.5	63.5	45	2	1	0	2	0	2	30.07.2012	1	0	0
449	32276	C	C_F	1	36	175	749.8	76.4	41	0	1	0	2	0	1	03.09.2015	0	0	1
449	32350	C	C_F	1	36	175	752.3	76.7	41	0	1	0	2	0	2	10.09.2015	0	0	1
449	32370	C	C_F	1	36	175	750.8	76.5	41	0	1	0	2	0	2	14.09.2015	0	0	1
449	32459	C	C_F	1	36	175	755.6	77	41	0	1	0	2	0	2	22.09.2015	0	0	1
450	32233	C	C_F	1	55	184	896	91.3	44	2	1	1	2	0	1	28.08.2015	1	0	0
450	32234	C	C_F	1	55	184	894.8	91.2	44	2	1	0	2	0	1	28.08.2015	1	1	0
450	32265	C	C_F	1	55	184	898.3	91.6	44	2	1	1	2	0	2	02.09.2015	1	0	0
450	32309	C	C_F	1	55	184	887.6	90.5	44	2	1	1	2	0	2	07.09.2015	1	0	0
451	17093	C	C_F	1	33	NaN	818.1	83.4	NaN	0	1	0	2	0	1	25.07.2011	1	1	0
451	17161	C	C_F	1	33	NaN	816.8	83.3	NaN	0	1	0	2	0	2	01.08.2011	1	0	0
451	17226	C	C_F	1	33	NaN	820.7	83.7	NaN	0	1	0	2	0	2	08.08.2011	1	0	0
452	32182	C	C_F	0	44	163	539.8	55	39	0	1	0	2	0	1	25.08.2015	1	1	0
452	32289	C	C_F	0	44	163	547.6	55.8	39	0	1	0	2	0	2	03.09.2015	1	0	0
452	32290	C	C_F	0	44	163	548.7	55.9	39	0	1	1	2	0	2	03.09.2015	1	0	0
452	32345	C	C_F	0	44	163	558.4	56.9	39	0	1	1	2	0	2	10.09.2015	1	0	0
452	32366	C	C_F	0	44	163	542.2	55.3	39	0	1	1	2	0	2	14.09.2015	1	0	0
452	32439	C	C_F	0	44	163	546.9	55.7	39	0	1	1	2	0	2	21.09.2015	1	0	0
453	13863	C	C_F	1	33	NaN	969.6	98.8	NaN	2	1	0	2	0	1	20.07.2010	0	0	1
453	13944	C	C_F	1	33	NaN	962.7	98.1	NaN	2	1	0	2	0	2	27.07.2010	0	0	1
455	20852	C	C_F	1	35	174	673.4	68.6	42	1	1	0	2	0	1	07.08.2012	0	0	1
455	20930	C	C_F	1	35	174	666.9	68	42	1	1	0	2	0	2	14.08.2012	0	0	1
455	20987	C	C_F	1	35	174	674.8	68.8	42	1	1	0	2	0	2	21.08.2012	0	0	1
455	21098	C	C_F	1	35	174	683.2	69.6	42	1	1	0	2	0	2	03.09.2012	0	0	1
455	21164	C	C_F	1	36	174	683	69.6	42	1	1	0	2	0	2	10.09.2012	0	0	1
456	10921	C	C_F	1	33	NaN	736	75	NaN	2	1	NaN	2	0	1	15.09.2009	1	0	0
456	10993	C	C_F	1	33	NaN	732.2	74.6	NaN	2	1	NaN	2	0	2	22.09.2009	1	0	0
456	11038	C	C_F	1	33	NaN	738.4	75.3	NaN	2	1	1	2	0	2	25.09.2009	1	0	0
456	11040	C	C_F	1	33	NaN	737	75.1	NaN	2	1	0	2	0	2	25.09.2009	1	0	0
456	11067	C	C_F	1	33	NaN	739.4	75.4	NaN	2	1	1	2	0	2	29.09.2009	1	0	0
456	11156	C	C_F	1	33	NaN	717.2	73.1	NaN	2	1	1	2	0	2	06.10.2009	1	0	0
456	11206	C	C_F	1	33	NaN	733.4	74.8	NaN	2	1	1	2	0	2	13.10.2009	1	0	0
457	17316	C	C_F	1	46	NaN	878.6	89.6	NaN	0	1	0	2	0	1	18.08.2011	0	0	1
457	17378	C	C_F	1	46	NaN	883.1	90	NaN	0	1	0	2	0	2	25.08.2011	0	0	1
458	10506	C	C_F	1	46	NaN	822.3	83.8	NaN	0	1	0	2	0	1	03.08.2009	0	0	1
458	10589	C	C_F	1	46	NaN	817.7	83.4	NaN	0	1	0	2	0	2	10.08.2009	0	0	1
458	10690	C	C_F	1	46	NaN	802.6	81.8	NaN	0	1	0	2	0	2	18.08.2009	0	0	1
458	10753	C	C_F	1	46	NaN	804.8	82	NaN	0	1	0	2	0	2	25.08.2009	0	0	1
459	10507	C	C_F	1	54	NaN	956.2	97.5	NaN	0	1	0	2	0	1	03.08.2009	1	1	0
459	10591	C	C_F	1	54	NaN	952.4	97.1	NaN	0	1	0	2	0	2	10.08.2009	1	0	0
459	10669	C	C_F	1	54	NaN	953.8	97.2	NaN	0	1	0	2	0	2	17.08.2009	1	0	0
459	10730	C	C_F	1	54	NaN	956.6	97.5	NaN	0	1	0	2	0	2	24.08.2009	1	0	0
459	10794	C	C_F	1	54	NaN	952.9	97.1	NaN	0	1	0	2	0	2	31.08.2009	1	0	0
459	10854	C	C_F	1	54	NaN	966.2	98.5	NaN	0	1	0	2	0	2	07.09.2009	1	0	0
460	24484	C	C_F	1	55	179	970.2	98.9	43	0	1	0	2	0	1	09.08.2013	1	1	0
460	24564	C	C_F	1	55	179	980.1	99.9	43	0	1	0	2	0	2	20.08.2013	1	0	0
460	24637	C	C_F	1	55	179	980	99.9	43	0	1	0	2	0	2	27.08.2013	1	0	0
460	24690	C	C_F	1	55	179	976.7	99.6	43	0	1	0	2	0	2	03.09.2013	1	0	0
460	24757	C	C_F	1	55	179	971.2	99	43	0	1	1	2	0	2	10.09.2013	1	0	0
460	24758	C	C_F	1	55	179	971.3	99	43	0	1	0	2	0	2	10.09.2013	1	0	0
460	24825	C	C_F	1	55	179	969.3	98.8	43	0	1	1	2	0	2	17.09.2013	1	0	0
460	24894	C	C_F	1	55	179	973.7	99.3	43	0	1	1	2	0	2	24.09.2013	1	0	0
461	21235	C	C_A	1	51	NaN	1124.7	114.6	NaN	1	2	0	2	0	1	17.09.2012	1	0	0
461	21318	C	C_A	1	51	NaN	1101.2	112.3	NaN	1	2	0	2	0	2	26.09.2012	1	0	0
461	21457	C	C_A	1	51	NaN	1083.7	110.5	NaN	1	2	0	2	0	2	10.10.2012	1	0	0
461	21524	C	C_A	1	51	NaN	1082.4	110.3	NaN	1	1	0	2	0	2	17.10.2012	1	0	0
462	14045	C	C_F	1	32	NaN	624.5	63.7	NaN	2	1	0	2	0	1	05.08.2010	1	1	0
462	14117	C	C_F	1	32	NaN	621.2	63.3	NaN	2	1	0	2	0	2	12.08.2010	1	0	0
462	14182	C	C_F	1	32	NaN	623.1	63.5	NaN	2	1	0	2	0	2	19.08.2010	1	0	0
463	24731	C	C_F	1	23	189	771.6	78.7	45	2	1	0	2	0	1	05.09.2013	0	0	1
463	24792	C	C_F	1	23	189	764.9	78	45	2	1	0	2	0	2	12.09.2013	0	0	1
463	24934	C	C_F	1	23	189	775.7	79.1	45	2	1	0	2	0	2	26.09.2013	0	0	1
463	24999	C	C_F	1	23	189	781.7	79.7	45	2	1	0	2	0	2	03.10.2013	0	0	1
463	25064	C	C_F	1	23	189	773.7	78.9	45	2	1	1	2	0	2	09.10.2013	0	0	1
463	25065	C	C_F	1	23	189	773.7	78.9	45	2	1	0	2	0	2	09.10.2013	0	0	1
464	28758	C	C_F	0	27	170	639.3	65.2	39	2	1	NaN	2	0	1	08.10.2014	1	0	0
464	28816	C	C_F	0	27	170	638.7	65.1	39	2	1	NaN	2	0	2	15.10.2014	1	0	0
464	28893	C	C_F	0	27	170	650.2	66.3	39	2	1	NaN	2	0	2	21.10.2014	1	0	0
464	28988	C	C_F	0	27	170	642.5	65.5	39	2	1	NaN	2	0	2	30.10.2014	1	0	0
465	14277	C	C_F	1	49	NaN	763.6	77.8	NaN	0	1	0	2	0	1	27.08.2010	1	1	0
465	14341	C	C_F	1	49	NaN	780.2	79.5	NaN	0	1	0	2	0	2	03.09.2010	1	0	0
465	14399	C	C_F	1	49	NaN	778.4	79.3	NaN	0	1	0	2	0	2	10.09.2010	1	0	0
465	14469	C	C_F	1	49	NaN	777.3	79.2	NaN	0	1	1	2	0	2	17.09.2010	1	0	0
465	14470	C	C_F	1	49	NaN	775.8	79.1	NaN	0	1	0	2	0	2	17.09.2010	1	0	0
466	20927	C	C_F	1	56	NaN	684	69.7	NaN	0	1	0	2	0	1	14.08.2012	1	1	0
466	20983	C	C_F	1	57	NaN	668.6	68.2	NaN	0	0	0	2	0	2	21.08.2012	1	0	0
467	25887	C	C_F	1	47	178	942.1	96	43	0	1	NaN	2	1	3	15.01.2014	1	0	0
467	25953	C	C_F	1	47	178	950.2	96.9	43	0	1	1	2	1	2	22.01.2014	1	0	0
467	25954	C	C_F	1	47	178	947.7	96.6	43	0	1	0	2	1	2	22.01.2014	1	0	0
467	26033	C	C_F	1	47	178	949.8	96.8	43	0	1	1	2	1	2	29.01.2014	1	0	0
467	26174	C	C_F	1	47	178	952.7	97.1	43	0	1	1	2	1	2	12.02.2014	1	0	0
467	5299	C	C_F	1	41	178	909	92.7	43	0	2	0	2	0	1	26.03.2008	1	0	0
468	17682	C	C_F	1	53	NaN	752.9	76.7	NaN	0	0	0	2	0	1	29.09.2011	1	0	0
468	17732	C	C_F	1	53	NaN	760.5	77.5	NaN	0	2	0	2	0	2	06.10.2011	1	0	0
468	17857	C	C_F	1	53	NaN	788.5	80.4	NaN	0	2	0	2	0	2	21.10.2011	1	0	0
469	28365	C	C_F	1	49	187	1053.7	107.4	43	1	1	0	2	0	1	05.09.2014	1	1	0
469	28398	C	C_F	1	49	187	1042.6	106.3	43	1	1	0	2	0	2	09.09.2014	1	0	0
469	28506	C	C_F	1	49	187	1032	105.2	43	1	1	0	2	0	2	18.09.2014	1	0	0
469	28580	C	C_F	1	49	187	1037.3	105.7	43	1	1	0	2	0	2	24.09.2014	1	0	0
469	28669	C	C_F	1	49	187	1042.6	106.3	43	1	1	0	2	0	2	01.10.2014	1	0	0
469	28849	C	C_F	1	49	187	1029.5	104.9	43	1	0	0	2	0	2	16.10.2014	1	0	0
469	29586	C	C_F	1	50	187	1043.6	106.4	43	1	1	0	2	1	3	07.01.2015	1	0	0
469	29641	C	C_F	1	50	187	1038.6	105.9	43	1	1	0	2	1	2	13.01.2015	1	0	0
469	29823	C	C_F	1	50	187	1023.9	104.4	43	1	1	0	2	1	2	28.01.2015	1	0	0
469	29912	C	C_F	1	50	187	1019.1	103.9	43	1	1	1	2	1	2	02.02.2015	1	0	0
469	29913	C	C_F	1	50	187	1016.6	103.6	43	1	1	0	2	1	2	02.02.2015	1	0	0
469	30001	C	C_F	1	50	187	1025.7	104.6	43	1	1	1	2	1	2	10.02.2015	1	0	0
470	24795	C	C_F	1	45	179	844.1	86	45	1	1	0	2	0	1	12.09.2013	0	0	1
470	24863	C	C_F	1	45	179	851.4	86.8	45	1	1	1	2	0	2	19.09.2013	0	0	1
470	24864	C	C_F	1	45	179	850.7	86.7	45	1	1	0	2	0	2	19.09.2013	0	0	1
470	24933	C	C_F	1	45	179	849	86.5	45	1	1	1	2	0	2	26.09.2013	0	0	1
470	24997	C	C_F	1	45	179	852	86.9	45	1	1	1	2	0	2	03.10.2013	0	0	1
470	25076	C	C_F	1	45	179	853	87	45	1	1	1	2	0	2	10.10.2013	0	0	1
470	25154	C	C_F	1	45	179	850.3	86.7	45	1	1	1	2	0	2	18.10.2013	0	0	1
470	25212	C	C_F	1	45	179	855.1	87.2	45	1	1	1	2	0	2	24.10.2013	0	0	1
471	14141	C	C_F	1	30	NaN	871.2	88.8	NaN	2	1	0	2	0	1	16.08.2010	1	1	0
471	14242	C	C_F	1	30	NaN	877.2	89.4	NaN	2	1	0	2	0	2	25.08.2010	1	0	0
471	14317	C	C_F	1	30	NaN	866.8	88.4	NaN	2	1	0	2	0	2	01.09.2010	1	0	0
471	14381	C	C_F	1	30	NaN	866.7	88.3	NaN	2	1	0	2	0	2	08.09.2010	1	0	0
471	14451	C	C_F	1	30	NaN	876.9	89.4	NaN	2	2	0	2	0	2	16.09.2010	1	0	0
471	14590	C	C_F	1	30	NaN	879.1	89.6	NaN	2	2	0	2	0	2	01.10.2010	1	0	0
471	14656	C	C_F	1	30	NaN	873.7	89.1	NaN	2	2	0	2	0	2	07.10.2010	1	0	0
472	28367	C	C_F	1	50	165	701.4	71.5	40	0	2	0	2	0	1	05.09.2014	1	0	0
472	28385	C	C_F	1	50	165	705.7	71.9	40	0	2	0	2	0	2	08.09.2014	1	0	0
472	28461	C	C_F	1	50	165	709.4	72.3	40	0	2	0	2	0	2	15.09.2014	1	0	0
472	28542	C	C_F	1	50	165	709	72.3	40	0	2	0	2	0	2	22.09.2014	1	0	0
472	28643	C	C_F	1	50	165	711.4	72.5	40	0	2	0	2	0	2	29.09.2014	1	0	0
472	28723	C	C_F	1	50	165	711.5	72.5	40	0	2	0	2	0	2	06.10.2014	1	0	0
472	28906	C	C_F	1	50	165	717.8	73.2	40	0	2	0	2	0	2	22.10.2014	1	0	0
472	29016	C	C_F	1	50	165	717.9	73.2	40	0	2	0	2	0	2	03.11.2014	1	0	0
473	14138	C	C_F	1	28	NaN	918.5	93.6	NaN	0	1	0	2	0	1	13.08.2010	1	1	0
473	14272	C	C_F	1	28	NaN	910.9	92.9	NaN	0	1	0	2	0	2	27.08.2010	1	0	0
473	14403	C	C_F	1	28	NaN	907.4	92.5	NaN	0	1	0	2	0	2	10.09.2010	1	0	0
474	3043	C	C_F	1	18	NaN	594.4	60.6	NaN	0	1	0	2	0	1	19.09.2007	1	1	0
474	3221	C	C_F	1	18	NaN	605.2	61.7	NaN	0	1	0	2	0	2	02.10.2007	1	0	0
474	3355	C	C_F	1	18	NaN	622.1	63.4	NaN	0	1	0	2	0	2	09.10.2007	1	0	0
475	40349	C	C_F	1	63	172	985.2	100.4	46	0	1	0	2	0	2	25.09.2017	1	0	0
476	10784	C	C_F	0	49	NaN	861.7	87.8	NaN	1	1	0	2	0	1	28.08.2009	0	0	1
476	10859	C	C_F	0	49	NaN	860.4	87.7	NaN	1	1	0	2	0	2	08.09.2009	0	0	1
476	10990	C	C_F	0	49	NaN	864.5	88.1	NaN	1	1	1	2	0	2	22.09.2009	0	0	1
476	11065	C	C_F	0	49	NaN	863.2	88	NaN	1	1	1	2	0	2	29.09.2009	0	0	1
476	11153	C	C_F	0	49	NaN	871.4	88.8	NaN	1	1	1	2	0	2	06.10.2009	0	0	1
477	22696	C	C_F	0	49	163	661.2	67.4	38	0	2	0	2	1	3	08.02.2013	1	0	0
477	22763	C	C_F	0	49	163	672.5	68.6	38	0	2	0	2	1	2	14.02.2013	1	0	0
477	22835	C	C_F	0	49	163	656.1	66.9	38	0	1	NaN	2	1	2	21.02.2013	1	0	0
477	22914	C	C_F	0	49	163	658.7	67.1	38	0	2	0	2	1	2	28.02.2013	1	0	0
477	22986	C	C_F	0	49	163	643.2	65.6	38	0	1	NaN	2	1	2	07.03.2013	1	0	0
477	23060	C	C_F	0	49	163	649.2	66.2	38	0	1	NaN	2	1	2	14.03.2013	1	0	0
477	14411	C	C_F	0	47	163	605.7	61.7	38	0	1	NaN	2	0	1	13.09.2010	1	0	0
478	32268	C	C_F	1	36	180	727	74.1	45	0	1	0	2	1	3	02.09.2015	0	0	1
478	32304	C	C_F	1	36	180	743.1	75.7	45	0	1	0	2	1	2	07.09.2015	0	0	1
478	32365	C	C_F	1	36	180	756.6	77.1	45	0	1	0	2	1	2	14.09.2015	0	0	1
478	32457	C	C_F	1	36	180	741.6	75.6	45	0	1	0	2	1	2	22.09.2015	0	0	1
478	32499	C	C_F	1	36	180	754	76.9	45	0	1	0	2	1	2	28.09.2015	0	0	1
478	10797	C	C_F	1	30	180	783.4	79.9	45	0	1	0	2	0	1	01.09.2009	0	0	1
478	10856	C	C_F	1	30	180	778.3	79.3	45	0	1	0	2	0	2	08.09.2009	0	0	1
479	11063	C	C_F	1	52	NaN	931.2	94.9	NaN	0	1	0	2	0	1	29.09.2009	1	1	0
479	11151	C	C_F	1	52	NaN	954.2	97.3	NaN	0	1	0	2	0	2	06.10.2009	1	0	0
479	11202	C	C_F	1	52	NaN	961.4	98	NaN	0	1	0	2	0	2	13.10.2009	1	0	0
480	2798	C	C_F	1	43	NaN	660.5	67.3	NaN	1	1	0	2	0	1	23.08.2007	1	1	0
480	2977	C	C_F	1	43	NaN	683.5	69.7	NaN	1	1	0	2	0	2	12.09.2007	1	0	0
480	3170	C	C_F	1	44	NaN	681.1	69.4	NaN	1	1	0	2	0	2	26.09.2007	1	0	0
481	17554	C	C_F	1	55	NaN	952.8	97.1	NaN	0	1	1	2	0	1	14.09.2011	1	0	0
481	17555	C	C_F	1	55	NaN	951.4	97	NaN	0	1	0	2	0	1	14.09.2011	1	1	0
481	17668	C	C_F	1	56	NaN	954.8	97.3	NaN	0	1	1	2	0	2	28.09.2011	1	0	0
483	28817	C	C_F	1	49	185	740.5	75.5	45	1	1	0	2	0	1	15.10.2014	0	0	1
483	28918	C	C_F	1	49	185	755.2	77	45	1	1	0	2	0	2	22.10.2014	0	0	1
483	28975	C	C_F	1	49	185	772.5	78.7	45	1	1	0	2	0	2	29.10.2014	0	0	1
483	29088	C	C_F	1	49	185	778.3	79.3	45	1	1	0	2	0	2	10.11.2014	0	0	1
483	29158	C	C_F	1	49	185	777.9	79.3	45	1	1	0	2	0	2	17.11.2014	0	0	1
483	29218	C	C_F	1	49	185	782.2	79.7	45	1	1	0	2	0	2	24.11.2014	0	0	1
484	11034	C	C_F	1	51	NaN	1068.4	108.9	NaN	0	1	0	2	0	2	25.09.2009	1	0	0
484	11115	C	C_F	1	51	NaN	1075.4	109.6	NaN	0	1	0	2	0	2	02.10.2009	1	0	0
485	32835	C	C_F	1	41	174	780.1	79.5	42	1	1	0	2	0	2	03.11.2015	1	0	0
485	32997	C	C_F	1	41	174	773	78.8	42	1	1	0	2	0	2	16.11.2015	1	0	0
485	33070	C	C_F	1	41	174	771.1	78.6	42	1	1	0	2	0	2	23.11.2015	1	0	0
487	14406	C	C_F	1	35	NaN	849.6	86.6	NaN	1	1	NaN	2	0	1	10.09.2010	1	0	0
487	14477	C	C_F	1	35	NaN	830.3	84.6	NaN	1	1	NaN	2	0	2	20.09.2010	1	0	0
488	24884	C	C_F	1	43	170	753.7	76.8	42	0	1	0	2	0	1	23.09.2013	1	1	0
488	25018	C	C_F	1	43	170	751.1	76.6	42	0	1	0	2	0	2	07.10.2013	1	0	0
488	25095	C	C_F	1	43	170	744.1	75.9	42	0	1	0	2	0	2	14.10.2013	1	0	0
488	25249	C	C_F	1	43	170	735.8	75	42	0	1	0	2	0	2	28.10.2013	1	0	0
489	14432	C	C_F	0	21	NaN	470.4	48	NaN	0	1	0	2	0	1	14.09.2010	0	0	1
489	14493	C	C_F	0	21	NaN	467.4	47.6	NaN	0	1	0	2	0	2	21.09.2010	0	0	1
490	28652	C	C_F	0	54	165	883.7	90.1	38	0	1	0	2	0	1	30.09.2014	1	1	0
490	28732	C	C_F	0	54	165	868.6	88.5	38	0	1	0	2	0	2	07.10.2014	1	0	0
490	28815	C	C_F	0	54	165	852.4	86.9	38	0	1	0	2	0	2	15.10.2014	1	0	0
491	11208	C	C_F	1	45	NaN	905	92.3	NaN	2	2	0	2	0	1	13.10.2009	1	0	0
491	11265	C	C_F	1	45	NaN	913.2	93.1	NaN	2	2	0	2	0	2	20.10.2009	1	0	0
491	11370	C	C_F	1	45	NaN	899.4	91.7	NaN	2	2	0	2	0	2	03.11.2009	1	0	0
491	11446	C	C_F	1	45	NaN	908.3	92.6	NaN	2	2	0	2	0	2	10.11.2009	1	0	0
492	6992	C	C_F	1	44	NaN	684.7	69.8	NaN	1	0	0	2	0	1	25.08.2008	1	0	0
492	7205	C	C_F	1	44	NaN	705.4	71.9	NaN	1	1	0	2	0	2	10.09.2008	1	0	0
493	28892	C	C_F	1	23	183	867.4	88.4	43	1	1	0	2	0	1	21.10.2014	1	1	0
493	29023	C	C_F	1	24	183	875.3	89.2	43	1	1	0	2	0	2	04.11.2014	1	0	0
495	21382	C	C_F	1	42	170	801.5	81.7	42	0	2	0	2	0	2	03.10.2012	1	0	0
495	21454	C	C_F	1	42	170	812.9	82.9	42	0	2	0	2	0	2	10.10.2012	1	0	0
495	21522	C	C_F	1	42	170	810.7	82.6	42	0	2	0	2	0	2	17.10.2012	1	0	0
496	32671	C	C_F	1	34	182	707.8	72.2	45	1	1	0	2	0	1	15.10.2015	1	1	0
496	32704	C	C_F	1	34	182	713.1	72.7	45	1	1	0	2	0	2	20.10.2015	1	0	0
496	32786	C	C_F	1	34	182	727.5	74.2	45	1	1	0	2	0	2	29.10.2015	1	0	0
496	32833	C	C_F	1	34	182	734.5	74.9	45	1	1	0	2	0	2	03.11.2015	1	0	0
496	32966	C	C_F	1	34	182	727.2	74.1	45	1	1	0	2	0	2	12.11.2015	1	0	0
497	7257	C	C_F	1	46	NaN	777.9	79.3	NaN	1	1	0	2	0	1	15.09.2008	0	0	1
497	7340	C	C_F	1	46	NaN	775	79	NaN	1	1	NaN	2	0	2	22.09.2008	0	0	1
497	7429	C	C_F	1	46	NaN	783.8	79.9	NaN	1	1	NaN	2	0	2	30.09.2008	0	0	1
497	7476	C	C_F	1	46	NaN	777.8	79.3	NaN	1	1	NaN	2	0	2	03.10.2008	0	0	1
497	7567	C	C_F	1	46	NaN	782.6	79.8	NaN	1	1	NaN	2	0	2	10.10.2008	0	0	1
497	7638	C	C_F	1	46	NaN	785.5	80.1	NaN	1	1	NaN	2	0	2	17.10.2008	0	0	1
498	17124	C	C_F	1	27	NaN	932.4	95	NaN	2	2	0	2	1	3	28.07.2011	1	0	0
498	17125	C	C_F	1	27	NaN	928.5	94.6	NaN	2	1	0	2	1	3	28.07.2011	1	0	0
498	17198	C	C_F	1	27	NaN	938.9	95.7	NaN	2	2	0	2	1	2	04.08.2011	1	0	0
498	17279	C	C_F	1	27	NaN	930.7	94.9	NaN	2	2	0	2	1	2	12.08.2011	1	0	0
498	4885	C	C_F	1	24	NaN	910.5	92.8	NaN	2	1	NaN	2	0	1	19.02.2008	1	0	0
498	5246	C	C_F	1	24	NaN	907.5	92.5	NaN	2	1	NaN	2	0	2	19.03.2008	1	0	0
498	5300	C	C_F	1	24	NaN	911.1	92.9	NaN	2	1	NaN	2	0	2	26.03.2008	1	0	0
498	5342	C	C_F	1	24	NaN	923	94.1	NaN	2	2	0	2	0	2	01.04.2008	1	0	0
499	17749	C	C_F	1	60	NaN	937.2	95.5	NaN	1	1	0	2	0	1	07.10.2011	1	1	0
499	17797	C	C_F	1	60	NaN	940	95.8	NaN	1	1	0	2	0	2	14.10.2011	1	0	0
499	17842	C	C_F	1	60	NaN	940	95.8	NaN	1	1	0	2	0	2	20.10.2011	1	0	0
499	17897	C	C_F	1	60	NaN	926.5	94.4	NaN	1	1	0	2	0	2	27.10.2011	1	0	0
499	17942	C	C_F	1	60	NaN	943	96.1	NaN	1	1	0	2	0	2	03.11.2011	1	0	0
500	17703	C	C_F	1	37	NaN	957.4	97.6	NaN	1	1	NaN	2	0	1	03.10.2011	1	0	0
500	17765	C	C_F	1	37	NaN	948.5	96.7	NaN	1	1	NaN	2	0	2	11.10.2011	1	0	0
500	17815	C	C_F	1	37	NaN	954	97.2	NaN	1	1	NaN	2	0	2	18.10.2011	1	0	0
501	40517	C	C_F	1	55	190	714.2	72.8	45	2	1	0	2	0	1	11.10.2017	1	1	0
501	40569	C	C_F	1	55	190	697.8	71.1	45	2	1	0	2	0	2	17.10.2017	1	0	0
501	40649	C	C_F	1	55	190	711.7	72.5	45	2	2	0	2	0	2	24.10.2017	1	0	0
501	40751	C	C_F	1	55	190	708.8	72.3	45	2	2	0	2	0	2	03.11.2017	1	0	0
501	40752	C	C_F	1	55	190	703.4	71.7	45	2	1	0	2	0	2	03.11.2017	1	0	0
501	40806	C	C_F	1	55	190	720.5	73.4	45	2	2	0	2	0	2	10.11.2017	1	0	0
502	11348	C	C_F	1	49	NaN	631	64.3	NaN	1	1	NaN	2	0	1	30.10.2009	1	0	0
502	11415	C	C_F	1	49	NaN	644.6	65.7	NaN	1	1	NaN	2	0	2	06.11.2009	1	0	0
503	17721	C	C_F	1	34	NaN	789.9	80.5	NaN	0	0	0	2	0	1	05.10.2011	1	0	0
503	17769	C	C_F	1	34	NaN	790.3	80.6	NaN	0	1	0	2	0	2	11.10.2011	1	0	0
503	17819	C	C_F	1	34	NaN	798.1	81.4	NaN	0	1	0	2	0	2	18.10.2011	1	0	0
[truncated: 6,972 more rows]
